# Supplementary material for: Whole Genome Resequencing of 20 Accessions of Rice Landraces Reveals Javanica Genomic Structure Variation and Allelic Genotypes of a Grain Weight Gene TGW2
Source: Front Plant Sci. 2022 Apr 25;13:857435. doi: 10.3389/fpls.2022.857435 (PMC9083905; doi:10.3389/fpls.2022.857435)
Supplement: Supplementary file 4 [file Table_1.XLSX]

## Sheet: Sheet1
Subspecies	Sample	Varieties name	Country	SV	Insertion	Deletion	Inversion	Intra-chromosomal translocation	Inter-chromosomal translocation
indica	R01	R752	China	7242	447	4954	192	203	1446
indica	R02	Hefengzhan	China	6796	409	4615	186	223	1363
indica	R03	R458	China	6914	383	4733	187	215	1396
indica	R09	Yuxiangyouzhan	China	7537	442	5094	206	242	1553
indica	R10	Haodali	China	7649	336	5144	222	263	1684
indica	R11	XieqingzaoB	China	7045	397	4750	179	228	1491
indica	R12	R225	China	7478	450	5052	181	231	1564
indica	R16	Guinongzhan	China	6901	364	4659	187	237	1454
indica	R17	YuetaiB	China	8842	456	5475	220	276	2415
indica	R18	Huazhan	China	6827	399	4526	183	228	1491
javanica	R04	Qamuyan	Philippines	3473	311	2190	104	159	709
javanica	R05	13B	Liberia	3317	261	2039	93	130	794
javanica	R06	551	Liberia	3731	316	2110	87	143	1075
javanica	R07	13494	Papua New Guinea	4087	288	2561	137	188	913
javanica	R08	Qipaprt 2	Philippines	3990	421	2406	119	168	876
javanica	R13	Nam mak	Laos	3979	265	2481	120	172	941
javanica	R14	Siew khaw	Laos	4970	423	2483	132	182	1750
javanica	R15	11390	USA	3926	255	2559	122	164	826
javanica	R19	Meqamunin 2	Philippines	4048	199	2340	112	168	1229
javanica	R20	Bugel	Philippines	3906	246	2472	129	185	874
