# Supplementary material for: Whole Genome Resequencing of 20 Accessions of Rice Landraces Reveals Javanica Genomic Structure Variation and Allelic Genotypes of a Grain Weight Gene TGW2
Source: Front Plant Sci. 2022 Apr 25;13:857435. doi: 10.3389/fpls.2022.857435 (PMC9083905; doi:10.3389/fpls.2022.857435)
Supplement: Supplementary file 5 [file Table_2.XLSX]

## Sheet: Sheet1
	Common SNP	Private SNP	Common InDel	Private InDel
Chr1	103373	97084	13706	12917
Chr2	53672	49077	7193	6649
Chr3	53641	45857	7832	6811
Chr4	45472	40426	6140	5282
Chr5	37738	31544	4869	4182
Chr6	56757	51817	6660	6128
Chr7	56760	52232	7318	6748
Chr8	54995	48160	6860	6178
Chr9	49090	46358	5768	5484
Chr10	46713	42443	5635	5211
Chr11	47640	43597	5429	5007
Chr12	44006	35509	5714	4754
Total	649857	584104	83124	75351
