# Supplementary material for: Whole Genome Resequencing of 20 Accessions of Rice Landraces Reveals Javanica Genomic Structure Variation and Allelic Genotypes of a Grain Weight Gene TGW2
Source: Front Plant Sci. 2022 Apr 25;13:857435. doi: 10.3389/fpls.2022.857435 (PMC9083905; doi:10.3389/fpls.2022.857435)
Supplement: Supplementary file 6 [file Table_3.XLSX]

## Sheet: javanica
	Common SNP	Private SNP	Shared SNP	Common InDel	Private InDel	Shared InDel
Chr1	13821	7532	6289	2512	1723	789
Chr2	12405	7810	4595	2316	1592	724
Chr3	16253	8469	7784	2909	1888	1021
Chr4	11898	6852	5046	2300	1442	858
Chr5	13356	7162	6194	1982	1294	688
Chr6	18550	13610	4940	3013	2481	532
Chr7	11247	6719	4528	1918	1348	570
Chr8	18500	11665	6835	2772	2090	682
Chr9	9483	6751	2732	1465	1181	284
Chr10	11310	7040	4270	1520	1096	424
Chr11	11462	7419	4043	1771	1349	422
Chr12	22074	13577	8497	3348	2388	960
Total	170359	104606	65753	27826	19872	7954
