# Supplementary material for: Whole Genome Resequencing of 20 Accessions of Rice Landraces Reveals Javanica Genomic Structure Variation and Allelic Genotypes of a Grain Weight Gene TGW2
Source: Front Plant Sci. 2022 Apr 25;13:857435. doi: 10.3389/fpls.2022.857435 (PMC9083905; doi:10.3389/fpls.2022.857435)
Supplement: Supplementary file 7 [file Table_4.XLSX]

## Sheet: gouninportname
LOC_Os01g02730	NA	NA	LOC_Os01g02730.1
LOC_Os01g02884	Q5ZEC6	Q5ZEC6_ORYSJ	LOC_Os01g02884.1
LOC_Os01g03340	Q5ZCA9	Q5ZCA9_ORYSJ	LOC_Os01g03340.1
LOC_Os01g03890	Q9LG92	Q9LG92_ORYSJ	LOC_Os01g03890.1
LOC_Os01g03900	NA	NA	LOC_Os01g03900.1
LOC_Os01g03960	Q5ZEH4	Q5ZEH4_ORYSJ	LOC_Os01g03960.1
LOC_Os01g03989	NA	NA	LOC_Os01g03989.1
LOC_Os01g04710	Q9AWT3	Q9AWT3_ORYSJ	LOC_Os01g04710.1
LOC_Os01g04720	Q5ZDH7	Q5ZDH7_ORYSJ	LOC_Os01g04720.1
LOC_Os01g04730	Q9AWS9	Q9AWS9_ORYSJ	LOC_Os01g04730.1
LOC_Os01g05760	NA	NA	LOC_Os01g05760.1
LOC_Os01g06000	Q0JQL2	Q0JQL2_ORYSJ	LOC_Os01g06000.1
LOC_Os01g06150	Q5ZCE2	Q5ZCE2_ORYSJ	LOC_Os01g06150.1
LOC_Os01g06220	Q93VD4	Q93VD4_ORYSJ	LOC_Os01g06220.1
LOC_Os01g06240	Q943Q1	Q943Q1_ORYSJ	LOC_Os01g06240.1
LOC_Os01g07770	Q5VR15	Q5VR15_ORYSJ	LOC_Os01g07770.1
LOC_Os01g08160	Q5VRW2	Q5VRW2_ORYSJ	LOC_Os01g08160.1
LOC_Os01g08170	Q5VRW0	Q5VRW0_ORYSJ	LOC_Os01g08170.1
LOC_Os01g08180	Q5VRV9	Q5VRV9_ORYSJ	LOC_Os01g08180.1
LOC_Os01g08190	Q5VRV5	Q5VRV5_ORYSJ	LOC_Os01g08190.1
LOC_Os01g08200	Q5VRV7	Q5VRV7_ORYSJ	LOC_Os01g08200.1
LOC_Os01g08220	Q0JQ78	Q0JQ78_ORYSJ	LOC_Os01g08220.1
LOC_Os01g08400	Q9LGF8	Q9LGF8_ORYSJ	LOC_Os01g08400.1
LOC_Os01g08410	Q5VRC9	Q5VRC9_ORYSJ	LOC_Os01g08410.1
LOC_Os01g08420	Q5VRT8	Q5VRT8_ORYSJ	LOC_Os01g08420.1
LOC_Os01g08430	Q5VRT7	Q5VRT7_ORYSJ	LOC_Os01g08430.1
LOC_Os01g08440	Q5VRT6	Q5VRT6_ORYSJ	LOC_Os01g08440.1
LOC_Os01g08450	NA	NA	LOC_Os01g08450.1
LOC_Os01g08460	Q5VR48	Q5VR48_ORYSJ	LOC_Os01g08460.1
LOC_Os01g08464	C7IXT0	C7IXT0_ORYSJ	LOC_Os01g08464.1
LOC_Os01g08660	Q5VR89	SIP11_ORYSJ	LOC_Os01g08660.1
LOC_Os01g08670	Q5VR88	Q5VR88_ORYSJ	LOC_Os01g08670.1
LOC_Os01g08680	Q5VR75	Q5VR75_ORYSJ	LOC_Os01g08680.1
LOC_Os01g08690	C7IW81	C7IW81_ORYSJ	LOC_Os01g08690.1
LOC_Os01g08700	Q0JQ44	Q0JQ44_ORYSJ	LOC_Os01g08700.1
LOC_Os01g08710	Q0JQ43	Q0JQ43_ORYSJ	LOC_Os01g08710.1
LOC_Os01g08750	Q5VRZ0	Q5VRZ0_ORYSJ	LOC_Os01g08750.1
LOC_Os01g08760	Q0JQ41	Q0JQ41_ORYSJ	LOC_Os01g08760.1
LOC_Os01g08770	Q9LGT2	Q9LGT2_ORYSJ	LOC_Os01g08770.1
LOC_Os01g08780	Q5VRY7	Q5VRY7_ORYSJ	LOC_Os01g08780.1
LOC_Os01g08790	Q5VRY6	Q5VRY6_ORYSJ	LOC_Os01g08790.1
LOC_Os01g08800	Q0JQ37	Q0JQ37_ORYSJ	LOC_Os01g08800.1
LOC_Os01g08810	Q9LGS7	Q9LGS7_ORYSJ	LOC_Os01g08810.1
LOC_Os01g08814	C7IXT3	C7IXT3_ORYSJ	LOC_Os01g08814.1
LOC_Os01g08820	A2ZQ19	A2ZQ19_ORYSJ	LOC_Os01g08820.1
LOC_Os01g08830	Q0JQ35	Q0JQ35_ORYSJ	LOC_Os01g08830.1
LOC_Os01g08840	Q5VRY3	Q5VRY3_ORYSJ	LOC_Os01g08840.1
LOC_Os01g08850	Q5VRY2	Q5VRY2_ORYSJ	LOC_Os01g08850.1
LOC_Os01g08860	Q5VRY1	HSP18_ORYSJ	LOC_Os01g08860.1
LOC_Os01g08880	C7IW99	C7IW99_ORYSJ	LOC_Os01g08880.1
LOC_Os01g08890	NA	NA	LOC_Os01g08890.1
LOC_Os01g08930	Q5VRY0	RH39_ORYSJ	LOC_Os01g08930.1
LOC_Os01g08940	NA	NA	LOC_Os01g08940.1
LOC_Os01g08950	Q0JQ29	Q0JQ29_ORYSJ	LOC_Os01g08950.1
LOC_Os01g08960	Q9LGR1	Q9LGR1_ORYSJ	LOC_Os01g08960.1
LOC_Os01g08970	Q0JQ27	Q0JQ27_ORYSJ	LOC_Os01g08970.1
LOC_Os01g08990	Q9LGQ8	Q9LGQ8_ORYSJ	LOC_Os01g08990.1
LOC_Os01g09000	Q5VRX8	Q5VRX8_ORYSJ	LOC_Os01g09000.1
LOC_Os01g09010	Q9LGQ6	AT9_ORYSJ	LOC_Os01g09010.1
LOC_Os01g09020	Q5VRX6	Q5VRX6_ORYSJ	LOC_Os01g09020.1
LOC_Os01g09030	Q0JQ23	Q0JQ23_ORYSJ	LOC_Os01g09030.1
LOC_Os01g09050	NA	NA	LOC_Os01g09050.1
LOC_Os01g09080	Q5VRX5	Q5VRX5_ORYSJ	LOC_Os01g09080.1
LOC_Os01g09090	Q5VRX4	Q5VRX4_ORYSJ	LOC_Os01g09090.1
LOC_Os01g09130	Q5VRX0	Q5VRX0_ORYSJ	LOC_Os01g09130.1
LOC_Os01g09140	Q9LGP6	Q9LGP6_ORYSJ	LOC_Os01g09140.1
LOC_Os01g09150	Q9LDL1	Q9LDL1_ORYSJ	LOC_Os01g09150.1
LOC_Os01g09180	NA	NA	LOC_Os01g09180.1
LOC_Os01g09190	Q5VRW8	Q5VRW8_ORYSJ	LOC_Os01g09190.1
LOC_Os01g09206	NA	NA	LOC_Os01g09206.1
LOC_Os01g09220	Q0JQ17	Q0JQ17_ORYSJ	LOC_Os01g09220.1
LOC_Os01g09230	Q5SN55	Q5SN55_ORYSJ	LOC_Os01g09230.1
LOC_Os01g09310	NA	NA	LOC_Os01g09310.1
LOC_Os01g09320	Q0JQ07	Q0JQ07_ORYSJ	LOC_Os01g09320.1
LOC_Os01g09330	Q5SND6	Q5SND6_ORYSJ	LOC_Os01g09330.1
LOC_Os01g09340	Q5SND5	Q5SND5_ORYSJ	LOC_Os01g09340.1
LOC_Os01g09350	NA	NA	LOC_Os01g09350.1
LOC_Os01g09360	Q5SNE5	Q5SNE5_ORYSJ	LOC_Os01g09360.1
LOC_Os01g09370	NA	NA	LOC_Os01g09370.1
LOC_Os01g09440	NA	NA	LOC_Os01g09440.1
LOC_Os01g09470	Q9LG84	Q9LG84_ORYSJ	LOC_Os01g09470.1
LOC_Os01g09480	Q9LG81	Q9LG81_ORYSJ	LOC_Os01g09480.1
LOC_Os01g09490	Q0JPZ8	Q0JPZ8_ORYSJ	LOC_Os01g09490.1
LOC_Os01g09500	NA	NA	LOC_Os01g09500.1
LOC_Os01g09690	NA	NA	LOC_Os01g09690.1
LOC_Os01g09800	Q9FDY4	NPR1_ORYSJ	LOC_Os01g09800.1
LOC_Os01g09810	Q5SMY8	Q5SMY8_ORYSJ	LOC_Os01g09810.1
LOC_Os01g09830	Q5SMY5	GRXS2_ORYSJ	LOC_Os01g09830.1
LOC_Os01g09850	Q5SMY2	Q5SMY2_ORYSJ	LOC_Os01g09850.1
LOC_Os01g09860	Q0JPX5	Q0JPX5_ORYSJ	LOC_Os01g09860.1
LOC_Os01g09870	NA	NA	LOC_Os01g09870.1
LOC_Os01g10100	Q5QMM6	Q5QMM6_ORYSJ	LOC_Os01g10100.1
LOC_Os01g10110	Q0JPW3	Q0JPW3_ORYSJ	LOC_Os01g10110.1
LOC_Os01g10150	Q0JPV8	Q0JPV8_ORYSJ	LOC_Os01g10150.1
LOC_Os01g10230	NA	NA	LOC_Os01g10230.1
LOC_Os01g10240	Q5QMF2	Q5QMF2_ORYSJ	LOC_Os01g10240.1
LOC_Os01g10250	Q5JKI8	Q5JKI8_ORYSJ	LOC_Os01g10250.1
LOC_Os01g10260	Q4VWY5	Q4VWY5_ORYSJ	LOC_Os01g10260.1
LOC_Os01g10270	NA	NA	LOC_Os01g10270.1
LOC_Os01g10280	Q5QN02	Q5QN02_ORYSJ	LOC_Os01g10280.1
LOC_Os01g10290	C7J7D1	C7J7D1_ORYSJ	LOC_Os01g10290.1
LOC_Os01g10680	Q9LWP7	Q9LWP7_ORYSJ	LOC_Os01g10680.1
LOC_Os01g12070	Q5NAT0	GUN2_ORYSJ	LOC_Os01g12070.1
LOC_Os01g12310	Q5NAP6	Q5NAP6_ORYSJ	LOC_Os01g12310.1
LOC_Os01g12330	Q5NAP2	Q5NAP2_ORYSJ	LOC_Os01g12330.1
LOC_Os01g12440	Q5NAQ6	Q5NAQ6_ORYSJ	LOC_Os01g12440.1
LOC_Os01g12460	Q0JPG3	Q0JPG3_ORYSJ	LOC_Os01g12460.1
LOC_Os01g12464	Q5NAG7	Q5NAG7_ORYSJ	LOC_Os01g12464.1
LOC_Os01g12540	NA	NA	LOC_Os01g12540.1
LOC_Os01g13030	Q0JPB9	Q0JPB9_ORYSJ	LOC_Os01g13030.1
LOC_Os01g13970	Q94I06	Q94I06_ORYSJ	LOC_Os01g13970.1
LOC_Os01g13990	NA	NA	LOC_Os01g13990.1
LOC_Os01g14430	Q1EHT3	Q1EHT3_ORYSJ	LOC_Os01g14430.1
LOC_Os01g16130	Q0JNT7	Q0JNT7_ORYSJ	LOC_Os01g16130.1
LOC_Os01g16550	NA	NA	LOC_Os01g16550.1
LOC_Os01g16560	NA	NA	LOC_Os01g16560.1
LOC_Os01g16580	NA	NA	LOC_Os01g16580.1
LOC_Os01g16730	C7IXV6	C7IXV6_ORYSJ	LOC_Os01g16730.1
LOC_Os01g16740	NA	NA	LOC_Os01g16740.1
LOC_Os01g16850	Q5NBN9	AGO15_ORYSJ	LOC_Os01g16850.1
LOC_Os01g16950	Q9SDG0	Q9SDG0_ORYSJ	LOC_Os01g16950.1
LOC_Os01g17030	Q5NBJ8	Q5NBJ8_ORYSJ	LOC_Os01g17030.1
LOC_Os01g17360	NA	NA	LOC_Os01g17360.1
LOC_Os01g18320	Q9FW53	Q9FW53_ORYSJ	LOC_Os01g18320.1
LOC_Os01g18330	NA	NA	LOC_Os01g18330.1
LOC_Os01g18340	NA	NA	LOC_Os01g18340.1
LOC_Os01g18350	Q5NB19	Q5NB19_ORYSJ	LOC_Os01g18350.1
LOC_Os01g18510	NA	NA	LOC_Os01g18510.1
LOC_Os01g18520	NA	NA	LOC_Os01g18520.1
LOC_Os01g18560	NA	NA	LOC_Os01g18560.1
LOC_Os01g18790	NA	NA	LOC_Os01g18790.1
LOC_Os01g18920	Q0JNG6	Q0JNG6_ORYSJ	LOC_Os01g18920.1
LOC_Os01g19000	NA	NA	LOC_Os01g19000.1
LOC_Os01g19010	NA	NA	LOC_Os01g19010.1
LOC_Os01g19090	NA	NA	LOC_Os01g19090.1
LOC_Os01g19330	Q93V35	Q93V35_ORYSJ	LOC_Os01g19330.1
LOC_Os01g19480	Q94D04	Q94D04_ORYSJ	LOC_Os01g19480.1
LOC_Os01g19490	Q5JL31	Q5JL31_ORYSJ	LOC_Os01g19490.1
LOC_Os01g19500	NA	NA	LOC_Os01g19500.1
LOC_Os01g19529	Q5JL28	Q5JL28_ORYSJ	LOC_Os01g19529.1
LOC_Os01g19548	Q0INJ5	Q0INJ5_ORYSJ	LOC_Os01g19548.1
LOC_Os01g19600	NA	NA	LOC_Os01g19600.1
LOC_Os01g19610	Q9FP37	Q9FP37_ORYSJ	LOC_Os01g19610.1
LOC_Os01g19680	NA	NA	LOC_Os01g19680.1
LOC_Os01g19694	Q9FP29	KNOS1_ORYSJ	LOC_Os01g19694.1
LOC_Os01g19720	NA	NA	LOC_Os01g19720.1
LOC_Os01g19730	NA	NA	LOC_Os01g19730.1
LOC_Os01g19740	Q9FP25	Q9FP25_ORYSJ	LOC_Os01g19740.1
LOC_Os01g19894	Q0JNC4	Q0JNC4_ORYSJ	LOC_Os01g19894.1
LOC_Os01g20140	NA	NA	LOC_Os01g20140.1
LOC_Os01g20740	NA	NA	LOC_Os01g20740.1
LOC_Os01g21070	C7J289	C7J289_ORYSJ	LOC_Os01g21070.1
LOC_Os01g21120	Q8LQ87	Q8LQ87_ORYSJ	LOC_Os01g21120.1
LOC_Os01g21520	Q655D4	Q655D4_ORYSJ	LOC_Os01g21520.1
LOC_Os01g21536	NA	NA	LOC_Os01g21536.1
LOC_Os01g21990	Q657G7	CAF2P_ORYSJ	LOC_Os01g21990.1
LOC_Os01g22336	NA	NA	LOC_Os01g22336.1
LOC_Os01g22352	Q5U1S8	Q5U1S8_ORYSJ	LOC_Os01g22352.1
LOC_Os01g22440	Q9AS03	Q9AS03_ORYSJ	LOC_Os01g22440.1
LOC_Os01g23100	Q5Z841	Q5Z841_ORYSJ	LOC_Os01g23100.1
LOC_Os01g23144	NA	NA	LOC_Os01g23144.1
LOC_Os01g23210	Q5Z837	Q5Z837_ORYSJ	LOC_Os01g23210.1
LOC_Os01g23290	NA	NA	LOC_Os01g23290.1
LOC_Os01g23320	NA	NA	LOC_Os01g23320.1
LOC_Os01g23330	NA	NA	LOC_Os01g23330.1
LOC_Os01g23420	NA	NA	LOC_Os01g23420.1
LOC_Os01g23850	Q5ZB35	Q5ZB35_ORYSJ	LOC_Os01g23850.1
LOC_Os01g23980	NA	NA	LOC_Os01g23980.1
LOC_Os01g24610	NA	NA	LOC_Os01g24610.1
LOC_Os01g24764	NA	NA	LOC_Os01g24764.1
LOC_Os01g25040	NA	NA	LOC_Os01g25040.1
LOC_Os01g25065	NA	NA	LOC_Os01g25065.1
LOC_Os01g25160	Q5ZAR3	Q5ZAR3_ORYSJ	LOC_Os01g25160.1
LOC_Os01g25189	C7IWD9	C7IWD9_ORYSJ	LOC_Os01g25189.1
LOC_Os01g25250	NA	NA	LOC_Os01g25250.1
LOC_Os01g25280	Q0JMY9	Q0JMY9_ORYSJ	LOC_Os01g25280.1
LOC_Os01g25290	Q5ZCQ8	Q5ZCQ8_ORYSJ	LOC_Os01g25290.1
LOC_Os01g25630	Q5ZBW9	Q5ZBW9_ORYSJ	LOC_Os01g25630.1
LOC_Os01g25650	NA	NA	LOC_Os01g25650.1
LOC_Os01g25670	NA	NA	LOC_Os01g25670.1
LOC_Os01g25710	NA	NA	LOC_Os01g25710.1
LOC_Os01g25720	Q5ZAJ9	Q5ZAJ9_ORYSJ	LOC_Os01g25720.1
LOC_Os01g25730	NA	NA	LOC_Os01g25730.1
LOC_Os01g25740	Q5ZAJ8	Q5ZAJ8_ORYSJ	LOC_Os01g25740.1
LOC_Os01g25760	Q0JMU6	Q0JMU6_ORYSJ	LOC_Os01g25760.1
LOC_Os01g25810	Q5ZAJ3	Q5ZAJ3_ORYSJ	LOC_Os01g25810.1
LOC_Os01g25820	Q5ZAJ0	RBOHB_ORYSJ	LOC_Os01g25820.1
LOC_Os01g25839	NA	NA	LOC_Os01g25839.1
LOC_Os01g26100	Q5ZC30	Q5ZC30_ORYSJ	LOC_Os01g26100.1
LOC_Os01g26300	NA	NA	LOC_Os01g26300.1
LOC_Os01g26370	NA	NA	LOC_Os01g26370.1
LOC_Os01g27700	Q5ZCW1	LAC1_ORYSJ	LOC_Os01g27700.1
LOC_Os01g27790	Q5ZCV0	Q5ZCV0_ORYSJ	LOC_Os01g27790.1
LOC_Os01g27900	NA	NA	LOC_Os01g27900.1
LOC_Os01g27920	NA	NA	LOC_Os01g27920.1
LOC_Os01g27930	NA	NA	LOC_Os01g27930.1
LOC_Os01g28100	Q5VNR9	Q5VNR9_ORYSJ	LOC_Os01g28100.1
LOC_Os01g28130	NA	NA	LOC_Os01g28130.1
LOC_Os01g28140	NA	NA	LOC_Os01g28140.1
LOC_Os01g28160	Q5VNR0	Q5VNR0_ORYSJ	LOC_Os01g28160.1
LOC_Os01g28330	NA	NA	LOC_Os01g28330.1
LOC_Os01g28370	Q5VPY8	Q5VPY8_ORYSJ	LOC_Os01g28370.1
LOC_Os01g28390	NA	NA	LOC_Os01g28390.1
LOC_Os01g28410	Q5VPY4	Q5VPY4_ORYSJ	LOC_Os01g28410.1
LOC_Os01g28474	Q0JMM4	Q0JMM4_ORYSJ	LOC_Os01g28474.1
LOC_Os01g28490	NA	NA	LOC_Os01g28490.1
LOC_Os01g28510	Q5VP13	Q5VP13_ORYSJ	LOC_Os01g28510.1
LOC_Os01g28520	Q5VP12	Q5VP12_ORYSJ	LOC_Os01g28520.1
LOC_Os01g28610	Q5VP17	Q5VP17_ORYSJ	LOC_Os01g28610.1
LOC_Os01g28660	Q5VP04	Q5VP04_ORYSJ	LOC_Os01g28660.1
LOC_Os01g28670	NA	NA	LOC_Os01g28670.1
LOC_Os01g28720	NA	NA	LOC_Os01g28720.1
LOC_Os01g29050	NA	NA	LOC_Os01g29050.1
LOC_Os01g29070	Q5VMQ2	Q5VMQ2_ORYSJ	LOC_Os01g29070.1
LOC_Os01g29120	NA	NA	LOC_Os01g29120.1
LOC_Os01g29180	Q0JML0	Q0JML0_ORYSJ	LOC_Os01g29180.1
LOC_Os01g29330	Q5VNJ6	Q5VNJ6_ORYSJ	LOC_Os01g29330.1
LOC_Os01g29450	NA	NA	LOC_Os01g29450.1
LOC_Os01g29590	NA	NA	LOC_Os01g29590.1
LOC_Os01g29670	NA	NA	LOC_Os01g29670.1
LOC_Os01g29760	NA	NA	LOC_Os01g29760.1
LOC_Os01g29804	NA	NA	LOC_Os01g29804.1
LOC_Os01g29900	NA	NA	LOC_Os01g29900.1
LOC_Os01g30940	NA	NA	LOC_Os01g30940.1
LOC_Os01g30956	NA	NA	LOC_Os01g30956.1
LOC_Os01g30970	C7J7A2	C7J7A2_ORYSJ	LOC_Os01g30970.1
LOC_Os01g30980	NA	NA	LOC_Os01g30980.1
LOC_Os01g30990	NA	NA	LOC_Os01g30990.1
LOC_Os01g31000	NA	NA	LOC_Os01g31000.1
LOC_Os01g31020	NA	NA	LOC_Os01g31020.1
LOC_Os01g31200	NA	NA	LOC_Os01g31200.1
LOC_Os01g31300	Q6YS04	Q6YS04_ORYSJ	LOC_Os01g31300.1
LOC_Os01g31320	NA	NA	LOC_Os01g31320.1
LOC_Os01g31450	Q0JMI8	Q0JMI8_ORYSJ	LOC_Os01g31450.1
LOC_Os01g31590	NA	NA	LOC_Os01g31590.1
LOC_Os01g31650	Q851I2	Q851I2_ORYSJ	LOC_Os01g31650.1
LOC_Os01g31740	NA	NA	LOC_Os01g31740.1
LOC_Os01g32110	NA	NA	LOC_Os01g32110.1
LOC_Os01g32184	Q5QN89	Q5QN89_ORYSJ	LOC_Os01g32184.1
LOC_Os01g32210	NA	NA	LOC_Os01g32210.1
LOC_Os01g32350	Q0JMF9	Q0JMF9_ORYSJ	LOC_Os01g32350.1
LOC_Os01g32400	NA	NA	LOC_Os01g32400.1
LOC_Os01g32550	Q8LMH7	Q8LMH7_ORYSJ	LOC_Os01g32550.1
LOC_Os01g34830	Q5JLH1	Q5JLH1_ORYSJ	LOC_Os01g34830.1
LOC_Os01g34840	NA	NA	LOC_Os01g34840.1
LOC_Os01g34850	Q0JM66	Q0JM66_ORYSJ	LOC_Os01g34850.1
LOC_Os01g34860	Q0JM65	Q0JM65_ORYSJ	LOC_Os01g34860.1
LOC_Os01g34880	Q0JM63	Q0JM63_ORYSJ	LOC_Os01g34880.1
LOC_Os01g34890	NA	NA	LOC_Os01g34890.1
LOC_Os01g34900	NA	NA	LOC_Os01g34900.1
LOC_Os01g34910	Q5JLG5	Q5JLG5_ORYSJ	LOC_Os01g34910.1
LOC_Os01g34930	Q5JLH4	Q5JLH4_ORYSJ	LOC_Os01g34930.1
LOC_Os01g34940	Q5JLI5	Q5JLI5_ORYSJ	LOC_Os01g34940.1
LOC_Os01g34950	NA	NA	LOC_Os01g34950.1
LOC_Os01g34960	NA	NA	LOC_Os01g34960.1
LOC_Os01g34970	Q0JM60	Q0JM60_ORYSJ	LOC_Os01g34970.1
LOC_Os01g34980	Q8S034	Q8S034_ORYSJ	LOC_Os01g34980.1
LOC_Os01g34990	Q8S033	Q8S033_ORYSJ	LOC_Os01g34990.1
LOC_Os01g35000	Q8S032	Q8S032_ORYSJ	LOC_Os01g35000.1
LOC_Os01g35030	C7IX17	C7IX17_ORYSJ	LOC_Os01g35030.1
LOC_Os01g35040	Q5JLH9	Q5JLH9_ORYSJ	LOC_Os01g35040.1
LOC_Os01g35050	Q5JLH8	Q5JLH8_ORYSJ	LOC_Os01g35050.1
LOC_Os01g36250	NA	NA	LOC_Os01g36250.1
LOC_Os01g38040	Q5JMN9	Q5JMN9_ORYSJ	LOC_Os01g38040.1
LOC_Os01g38090	Q5JMN7	Q5JMN7_ORYSJ	LOC_Os01g38090.1
LOC_Os01g38229	Q657L4	Q657L4_ORYSJ	LOC_Os01g38229.1
LOC_Os01g38330	Q657L0	Q657L0_ORYSJ	LOC_Os01g38330.1
LOC_Os01g38340	NA	NA	LOC_Os01g38340.1
LOC_Os01g38359	Q656V1	Q656V1_ORYSJ	LOC_Os01g38359.1
LOC_Os01g38400	NA	NA	LOC_Os01g38400.1
LOC_Os01g38420	NA	NA	LOC_Os01g38420.1
LOC_Os01g38440	Q0D552	Q0D552_ORYSJ	LOC_Os01g38440.1
LOC_Os01g38460	Q75H85	Q75H85_ORYSJ	LOC_Os01g38460.1
LOC_Os01g38550	NA	NA	LOC_Os01g38550.1
LOC_Os01g39120	Q656T0	Q656T0_ORYSJ	LOC_Os01g39120.1
LOC_Os01g39136	C7J9T8	C7J9T8_ORYSJ	LOC_Os01g39136.1
LOC_Os01g39190	Q656S4	Q656S4_ORYSJ	LOC_Os01g39190.1
LOC_Os01g39200	NA	NA	LOC_Os01g39200.1
LOC_Os01g39230	NA	NA	LOC_Os01g39230.1
LOC_Os01g39250	Q656T8	Q656T8_ORYSJ	LOC_Os01g39250.1
LOC_Os01g39340	Q656P6	Q656P6_ORYSJ	LOC_Os01g39340.1
LOC_Os01g39370	NA	NA	LOC_Os01g39370.1
LOC_Os01g39385	Q656P5	Q656P5_ORYSJ	LOC_Os01g39385.1
LOC_Os01g39490	Q656Z9	Q656Z9_ORYSJ	LOC_Os01g39490.1
LOC_Os01g39950	Q8LJ82	Q8LJ82_ORYSJ	LOC_Os01g39950.1
LOC_Os01g40540	Q5ZBP8	Q5ZBP8_ORYSJ	LOC_Os01g40540.1
LOC_Os01g40640	Q5ZC75	Q5ZC75_ORYSJ	LOC_Os01g40640.1
LOC_Os01g40650	Q5ZC74	Q5ZC74_ORYSJ	LOC_Os01g40650.1
LOC_Os01g40730	Q5ZC71	Q5ZC71_ORYSJ	LOC_Os01g40730.1
LOC_Os01g40740	Q5ZC70	Q5ZC70_ORYSJ	LOC_Os01g40740.1
LOC_Os01g40750	Q5ZC69	Q5ZC69_ORYSJ	LOC_Os01g40750.1
LOC_Os01g40830	Q0JLL3	Q0JLL3_ORYSJ	LOC_Os01g40830.1
LOC_Os01g47000	NA	NA	LOC_Os01g47000.1
LOC_Os01g47040	Q8SA25	Q8SA25_ORYSJ	LOC_Os01g47040.1
LOC_Os01g47050	Q5SMS6	Q5SMS6_ORYSJ	LOC_Os01g47050.1
LOC_Os01g47070	Q0JK83	Q0JK83_ORYSJ	LOC_Os01g47070.1
LOC_Os01g47080	Q0JKP1	Q0JKP1_ORYSJ	LOC_Os01g47080.1
LOC_Os01g47090	Q5SMS4	Q5SMS4_ORYSJ	LOC_Os01g47090.1
LOC_Os01g47100	Q5SMS3	Q5SMS3_ORYSJ	LOC_Os01g47100.1
LOC_Os01g47110	Q5SMS2	Q5SMS2_ORYSJ	LOC_Os01g47110.1
LOC_Os01g47130	Q0JKP0	Q0JKP0_ORYSJ	LOC_Os01g47130.1
LOC_Os01g47180	Q6K2J7	Q6K2J7_ORYSJ	LOC_Os01g47180.1
LOC_Os01g47190	Q0JKN8	Q0JKN8_ORYSJ	LOC_Os01g47190.1
LOC_Os01g47256	Q0JKN6	Q0JKN6_ORYSJ	LOC_Os01g47256.1
LOC_Os01g47270	Q5SMR3	Q5SMR3_ORYSJ	LOC_Os01g47270.1
LOC_Os01g47280	Q5SMR2	Q5SMR2_ORYSJ	LOC_Os01g47280.1
LOC_Os01g47300	NA	NA	LOC_Os01g47300.1
LOC_Os01g47360	Q8LR32	Q8LR32_ORYSJ	LOC_Os01g47360.1
LOC_Os01g47370	Q5SN44	Q5SN44_ORYSJ	LOC_Os01g47370.1
LOC_Os01g47380	Q5SN43	Q5SN43_ORYSJ	LOC_Os01g47380.1
LOC_Os01g47400	Q0JKM9	MAN1_ORYSJ	LOC_Os01g47400.1
LOC_Os01g47410	Q0JKM8	Q0JKM8_ORYSJ	LOC_Os01g47410.1
LOC_Os01g47420	Q5SN39	Q5SN39_ORYSJ	LOC_Os01g47420.1
LOC_Os01g47430	Q5SN38	Q5SN38_ORYSJ	LOC_Os01g47430.1
LOC_Os01g47440	Q5SN68	Q5SN68_ORYSJ	LOC_Os01g47440.1
LOC_Os01g47450	Q0JKM5	Q0JKM5_ORYSJ	LOC_Os01g47450.1
LOC_Os01g47460	Q5SN65	Q5SN65_ORYSJ	LOC_Os01g47460.1
LOC_Os01g47470	Q94E23	Q94E23_ORYSJ	LOC_Os01g47470.1
LOC_Os01g47480	NA	NA	LOC_Os01g47480.1
LOC_Os01g47490	Q5SN58	Q5SN58_ORYSJ	LOC_Os01g47490.1
LOC_Os01g47500	Q5SN62	Q5SN62_ORYSJ	LOC_Os01g47500.1
LOC_Os01g47510	NA	NA	LOC_Os01g47510.1
LOC_Os01g47520	NA	NA	LOC_Os01g47520.1
LOC_Os01g47530	Q0JKM0	Q0JKM0_ORYSJ	LOC_Os01g47530.1
LOC_Os01g47540	Q5SN52	Q5SN52_ORYSJ	LOC_Os01g47540.1
LOC_Os01g47550	Q5SN59	Q5SN59_ORYSJ	LOC_Os01g47550.1
LOC_Os01g47700	NA	NA	LOC_Os01g47700.1
LOC_Os01g47710	Q0JKK6	WOX7_ORYSJ	LOC_Os01g47710.1
LOC_Os01g48090	NA	NA	LOC_Os01g48090.1
LOC_Os01g48140	Q5QMQ6	Q5QMQ6_ORYSJ	LOC_Os01g48140.1
LOC_Os01g48150	NA	NA	LOC_Os01g48150.1
LOC_Os01g48230	NA	NA	LOC_Os01g48230.1
LOC_Os01g48260	NA	NA	LOC_Os01g48260.1
LOC_Os01g48270	Q0JKI1	Q0JKI1_ORYSJ	LOC_Os01g48270.1
LOC_Os01g48290	NA	NA	LOC_Os01g48290.1
LOC_Os01g48300	Q5QMQ3	Q5QMQ3_ORYSJ	LOC_Os01g48300.1
LOC_Os01g48310	NA	NA	LOC_Os01g48310.1
LOC_Os01g48320	Q8LJG7	Q8LJG7_ORYSJ	LOC_Os01g48320.1
LOC_Os01g48330	Q5QMK0	Q5QMK0_ORYSJ	LOC_Os01g48330.1
LOC_Os01g48339	NA	NA	LOC_Os01g48339.1
LOC_Os01g48370	Q5QM26	Q5QM26_ORYSJ	LOC_Os01g48370.1
LOC_Os01g48430	Q5QM34	Q5QM34_ORYSJ	LOC_Os01g48430.1
LOC_Os01g48446	Q8LQP7	Q8LQP7_ORYSJ	LOC_Os01g48446.1
LOC_Os01g48470	NA	NA	LOC_Os01g48470.1
LOC_Os01g48520	NA	NA	LOC_Os01g48520.1
LOC_Os01g48525	NA	NA	LOC_Os01g48525.1
LOC_Os01g49529	Q5N7Q7	Q5N7Q7_ORYSJ	LOC_Os01g49529.1
LOC_Os01g49790	NA	NA	LOC_Os01g49790.1
LOC_Os01g49980	NA	NA	LOC_Os01g49980.1
LOC_Os01g50220	Q5N8K9	Q5N8K9_ORYSJ	LOC_Os01g50220.1
LOC_Os01g50230	Q5N8K8	Q5N8K8_ORYSJ	LOC_Os01g50230.1
LOC_Os01g50440	Q943A6	Q943A6_ORYSJ	LOC_Os01g50440.1
LOC_Os01g50510	Q5N8I3	Q5N8I3_ORYSJ	LOC_Os01g50510.1
LOC_Os01g50580	Q5N8H9	Q5N8H9_ORYSJ	LOC_Os01g50580.1
LOC_Os01g50600	NA	NA	LOC_Os01g50600.1
LOC_Os01g50616	Q5N8J4	Q5N8J4_ORYSJ	LOC_Os01g50616.1
LOC_Os01g50622	Q5N8J3	BBD1_ORYSJ	LOC_Os01g50622.1
LOC_Os01g50630	NA	NA	LOC_Os01g50630.1
LOC_Os01g50640	NA	NA	LOC_Os01g50640.1
LOC_Os01g50670	NA	NA	LOC_Os01g50670.1
LOC_Os01g50680	Q0JK21	Q0JK21_ORYSJ	LOC_Os01g50680.1
LOC_Os01g50690	Q5N9R6	Q5N9R6_ORYSJ	LOC_Os01g50690.1
LOC_Os01g50700	Q5N9R5	Q5N9R5_ORYSJ	LOC_Os01g50700.1
LOC_Os01g50720	Q0JK18	Q0JK18_ORYSJ	LOC_Os01g50720.1
LOC_Os01g50740	Q8LR66	Q8LR66_ORYSJ	LOC_Os01g50740.1
LOC_Os01g50750	Q0JK15	Q0JK15_ORYSJ	LOC_Os01g50750.1
LOC_Os01g50760	O04882	O04882_ORYSJ	LOC_Os01g50760.1
LOC_Os01g50770	Q0JK13	Q0JK13_ORYSJ	LOC_Os01g50770.1
LOC_Os01g50790	NA	NA	LOC_Os01g50790.1
LOC_Os01g50800	NA	NA	LOC_Os01g50800.1
LOC_Os01g50830	Q0JK10	Q0JK10_ORYSJ	LOC_Os01g50830.1
LOC_Os01g50840	Q5N9R9	Q5N9R9_ORYSJ	LOC_Os01g50840.1
LOC_Os01g50849	Q0JK08	Q0JK08_ORYSJ	LOC_Os01g50849.1
LOC_Os01g50870	Q5NAD3	Q5NAD3_ORYSJ	LOC_Os01g50870.1
LOC_Os01g50900	Q94JF3	GL12_ORYSJ	LOC_Os01g50900.1
LOC_Os01g50910	Q94JF2	Q94JF2_ORYSJ	LOC_Os01g50910.1
LOC_Os01g50930	Q94JF1	Q94JF1_ORYSJ	LOC_Os01g50930.1
LOC_Os01g50940	Q5N8F6	Q5N8F6_ORYSJ	LOC_Os01g50940.1
LOC_Os01g50950	NA	NA	LOC_Os01g50950.1
LOC_Os01g50960	Q94JE5	Q94JE5_ORYSJ	LOC_Os01g50960.1
LOC_Os01g50970	Q5N8F4	Q5N8F4_ORYSJ	LOC_Os01g50970.1
LOC_Os01g50990	Q8S0P4	Q8S0P4_ORYSJ	LOC_Os01g50990.1
LOC_Os01g51410	Q5N8C7	Q5N8C7_ORYSJ	LOC_Os01g51410.1
LOC_Os01g51430	Q9ASD3	Q9ASD3_ORYSJ	LOC_Os01g51430.1
LOC_Os01g51560	Q8S0H7	Q8S0H7_ORYSJ	LOC_Os01g51560.1
LOC_Os01g51950	NA	NA	LOC_Os01g51950.1
LOC_Os01g52710	Q5JM51	Q5JM51_ORYSJ	LOC_Os01g52710.1
LOC_Os01g52820	NA	NA	LOC_Os01g52820.1
LOC_Os01g54330	Q5JNI9	Q5JNI9_ORYSJ	LOC_Os01g54330.1
LOC_Os01g55080	NA	NA	LOC_Os01g55080.1
LOC_Os01g55094	Q5JMN1	Q5JMN1_ORYSJ	LOC_Os01g55094.1
LOC_Os01g55140	NA	NA	LOC_Os01g55140.1
LOC_Os01g55880	C7IWN8	C7IWN8_ORYSJ	LOC_Os01g55880.1
LOC_Os01g56050	Q5JN06	Q5JN06_ORYSJ	LOC_Os01g56050.1
LOC_Os01g56080	Q5ZAN5	Q5ZAN5_ORYSJ	LOC_Os01g56080.1
LOC_Os01g56130	Q0JJ06	Q0JJ06_ORYSJ	LOC_Os01g56130.1
LOC_Os01g56370	Q0JIY9	Q0JIY9_ORYSJ	LOC_Os01g56370.1
LOC_Os01g56830	NA	NA	LOC_Os01g56830.1
LOC_Os01g56840	Q5ZBY5	Q5ZBY5_ORYSJ	LOC_Os01g56840.1
LOC_Os01g56880	Q8LJ43	Q8LJ43_ORYSJ	LOC_Os01g56880.1
LOC_Os01g56900	Q0JIU6	Q0JIU6_ORYSJ	LOC_Os01g56900.1
LOC_Os01g56910	Q5ZAZ1	Q5ZAZ1_ORYSJ	LOC_Os01g56910.1
LOC_Os01g56930	C7IX82	C7IX82_ORYSJ	LOC_Os01g56930.1
LOC_Os01g56940	Q60GC1	EXO1_ORYSJ	LOC_Os01g56940.1
LOC_Os01g56960	Q0JIU1	Q0JIU1_ORYSJ	LOC_Os01g56960.1
LOC_Os01g56990	Q0JIT9	Q0JIT9_ORYSJ	LOC_Os01g56990.1
LOC_Os01g57004	NA	NA	LOC_Os01g57004.1
LOC_Os01g57160	NA	NA	LOC_Os01g57160.1
LOC_Os01g57240	Q5ZAW0	Q5ZAW0_ORYSJ	LOC_Os01g57240.1
LOC_Os01g57250	Q5ZAV2	Q5ZAV2_ORYSJ	LOC_Os01g57250.1
LOC_Os01g57280	Q8LQR8	Q8LQR8_ORYSJ	LOC_Os01g57280.1
LOC_Os01g57340	Q8LQR6	Q8LQR6_ORYSJ	LOC_Os01g57340.1
LOC_Os01g57350	Q5ZAU4	Q5ZAU4_ORYSJ	LOC_Os01g57350.1
LOC_Os01g57360	Q5ZAU5	Q5ZAU5_ORYSJ	LOC_Os01g57360.1
LOC_Os01g57370	Q5ZAU3	Q5ZAU3_ORYSJ	LOC_Os01g57370.1
LOC_Os01g57570	Q8LQN2	Q8LQN2_ORYSJ	LOC_Os01g57570.1
LOC_Os01g57580	Q5ZAK6	Q5ZAK6_ORYSJ	LOC_Os01g57580.1
LOC_Os01g57590	NA	NA	LOC_Os01g57590.1
LOC_Os01g57599	Q5WMS3	Q5WMS3_ORYSJ	LOC_Os01g57599.1
LOC_Os01g57610	Q0JIP7	Q0JIP7_ORYSJ	LOC_Os01g57610.1
LOC_Os01g57620	Q5ZAM6	Q5ZAM6_ORYSJ	LOC_Os01g57620.1
LOC_Os01g57630	Q8LQM2	Q8LQM2_ORYSJ	LOC_Os01g57630.1
LOC_Os01g57650	Q8LQM0	Q8LQM0_ORYSJ	LOC_Os01g57650.1
LOC_Os01g58240	Q5ZBR8	Q5ZBR8_ORYSJ	LOC_Os01g58240.1
LOC_Os01g58280	Q0JIK5	Q0JIK5_ORYSJ	LOC_Os01g58280.1
LOC_Os01g59360	Q5VQQ5	CDPK2_ORYSJ	LOC_Os01g59360.1
LOC_Os01g59370	NA	NA	LOC_Os01g59370.1
LOC_Os01g59400	Q5VQP9	Q5VQP9_ORYSJ	LOC_Os01g59400.1
LOC_Os01g59410	Q8S202	Q8S202_ORYSJ	LOC_Os01g59410.1
LOC_Os01g60050	C7IXS4	C7IXS4_ORYSJ	LOC_Os01g60050.1
LOC_Os01g60720	NA	NA	LOC_Os01g60720.1
LOC_Os01g61450	Q5QLU0	Q5QLU0_ORYSJ	LOC_Os01g61450.1
LOC_Os01g61490	NA	NA	LOC_Os01g61490.1
LOC_Os01g61590	Q8LPZ7	CDPK3_ORYSJ	LOC_Os01g61590.1
LOC_Os01g61730	NA	NA	LOC_Os01g61730.1
LOC_Os01g62090	NA	NA	LOC_Os01g62090.1
LOC_Os01g63100	NA	NA	LOC_Os01g63100.1
LOC_Os01g63120	NA	NA	LOC_Os01g63120.1
LOC_Os01g63150	Q8S283	Q8S283_ORYSJ	LOC_Os01g63150.1
LOC_Os01g63330	NA	NA	LOC_Os01g63330.1
LOC_Os01g63540	Q5N7U6	Q5N7U6_ORYSJ	LOC_Os01g63540.1
LOC_Os01g63560	NA	NA	LOC_Os01g63560.1
LOC_Os01g63610	Q5N7T6	Q5N7T6_ORYSJ	LOC_Os01g63610.1
LOC_Os01g63630	Q5N7T2	Q5N7T2_ORYSJ	LOC_Os01g63630.1
LOC_Os01g63640	NA	NA	LOC_Os01g63640.1
LOC_Os01g63740	NA	NA	LOC_Os01g63740.1
LOC_Os01g63880	Q5N910	Q5N910_ORYSJ	LOC_Os01g63880.1
LOC_Os01g63970	Q94DD4	STLP1_ORYSJ	LOC_Os01g63970.1
LOC_Os01g64200	NA	NA	LOC_Os01g64200.1
LOC_Os01g66120	Q0JH48	Q0JH48_ORYSJ	LOC_Os01g66120.1
LOC_Os01g66360	Q5N8G1	ISPD_ORYSJ	LOC_Os01g66360.1
LOC_Os01g66580	Q0JH19	Q0JH19_ORYSJ	LOC_Os01g66580.1
LOC_Os01g67680	Q5N6X0	Q5N6X0_ORYSJ	LOC_Os01g67680.1
LOC_Os01g69000	NA	NA	LOC_Os01g69000.1
LOC_Os01g69270	Q5JL26	Q5JL26_ORYSJ	LOC_Os01g69270.1
LOC_Os01g69830	H2CTC2	H2CTC2_9ORYZ	LOC_Os01g69830.1
LOC_Os01g69850	Q9XJ61	MAD51_ORYSJ	LOC_Os01g69850.1
LOC_Os01g69870	Q8RYH1	Q8RYH1_ORYSJ	LOC_Os01g69870.1
LOC_Os01g69890	Q8RYH0	Q8RYH0_ORYSJ	LOC_Os01g69890.1
LOC_Os01g69900	C7IWB6	C7IWB6_ORYSJ	LOC_Os01g69900.1
LOC_Os01g69904	NA	NA	LOC_Os01g69904.1
LOC_Os01g69910	Q5JJP3	Q5JJP3_ORYSJ	LOC_Os01g69910.1
LOC_Os01g69920	C7IWB7	C7IWB7_ORYSJ	LOC_Os01g69920.1
LOC_Os01g69930	Q8RYF9	Q8RYF9_ORYSJ	LOC_Os01g69930.1
LOC_Os01g69940	Q5JJQ2	Q5JJQ2_ORYSJ	LOC_Os01g69940.1
LOC_Os01g69960	Q5JJP9	Q5JJP9_ORYSJ	LOC_Os01g69960.1
LOC_Os01g69970	Q652X1	Q652X1_ORYSJ	LOC_Os01g69970.1
LOC_Os01g69980	Q6H7C7	Q6H7C7_ORYSJ	LOC_Os01g69980.1
LOC_Os01g69990	Q0JGG6	Q0JGG6_ORYSJ	LOC_Os01g69990.1
LOC_Os01g70000	Q8RUX1	Q8RUX1_ORYSJ	LOC_Os01g70000.1
LOC_Os01g70010	Q5JJP5	Q5JJP5_ORYSJ	LOC_Os01g70010.1
LOC_Os01g70020	Q5JKH1	Q5JKH1_ORYSJ	LOC_Os01g70020.1
LOC_Os01g70030	NA	NA	LOC_Os01g70030.1
LOC_Os01g70040	NA	NA	LOC_Os01g70040.1
LOC_Os01g70050	Q5JKG8	Q5JKG8_ORYSJ	LOC_Os01g70050.1
LOC_Os01g70060	Q5JKG7	Q5JKG7_ORYSJ	LOC_Os01g70060.1
LOC_Os01g70080	Q0JGG1	Q0JGG1_ORYSJ	LOC_Os01g70080.1
LOC_Os01g70090	Q8RUL6	Q8RUL6_ORYSJ	LOC_Os01g70090.1
LOC_Os01g70100	Q5JK16	Q5JK16_ORYSJ	LOC_Os01g70100.1
LOC_Os01g70110	Q5JK15	Q5JK15_ORYSJ	LOC_Os01g70110.1
LOC_Os01g70120	Q5JK12	Q5JK12_ORYSJ	LOC_Os01g70120.1
LOC_Os01g70130	Q0JGF6	Q0JGF6_ORYSJ	LOC_Os01g70130.1
LOC_Os01g70140	Q8S1Y5	Q8S1Y5_ORYSJ	LOC_Os01g70140.1
LOC_Os01g70150	NA	NA	LOC_Os01g70150.1
LOC_Os01g70160	Q5JK23	Q5JK23_ORYSJ	LOC_Os01g70160.1
LOC_Os01g70170	Q5JK10	Q5JK10_ORYSJ	LOC_Os01g70170.1
LOC_Os01g70180	Q8S1X9	GT13_ORYSJ	LOC_Os01g70180.1
LOC_Os01g70210	Q8S1X5	Q8S1X5_ORYSJ	LOC_Os01g70210.1
LOC_Os01g70900	NA	NA	LOC_Os01g70900.1
LOC_Os01g71380	Q8S9Q6	Q8S9Q6_ORYSJ	LOC_Os01g71380.1
LOC_Os01g71390	Q5JKL7	Q5JKL7_ORYSJ	LOC_Os01g71390.1
LOC_Os01g71400	Q5JKJ4	Q5JKJ4_ORYSJ	LOC_Os01g71400.1
LOC_Os01g72049	Q5JKX9	Q5JKX9_ORYSJ	LOC_Os01g72049.1
LOC_Os01g72080	Q8RZB7	Q8RZB7_ORYSJ	LOC_Os01g72080.1
LOC_Os01g72090	Q5JKX7	Q5JKX7_ORYSJ	LOC_Os01g72090.1
LOC_Os01g72340	Q5JKZ9	Q5JKZ9_ORYSJ	LOC_Os01g72340.1
LOC_Os01g72370	Q0JFZ0	Q0JFZ0_ORYSJ	LOC_Os01g72370.1
LOC_Os01g72440	Q5JKZ4	Q5JKZ4_ORYSJ	LOC_Os01g72440.1
LOC_Os01g72450	Q941Y9	Q941Y9_ORYSJ	LOC_Os01g72450.1
LOC_Os01g72520	Q8RYK2	Q8RYK2_ORYSJ	LOC_Os01g72520.1
LOC_Os01g72530	Q8RYK0	CML31_ORYSJ	LOC_Os01g72530.1
LOC_Os01g72550	Q8RYJ8	CML19_ORYSJ	LOC_Os01g72550.1
LOC_Os01g72600	Q5JJU1	Q5JJU1_ORYSJ	LOC_Os01g72600.1
LOC_Os01g72630	Q5JJU0	Q5JJU0_ORYSJ	LOC_Os01g72630.1
LOC_Os01g72670	Q5JK54	Q5JK54_ORYSJ	LOC_Os01g72670.1
LOC_Os01g72680	Q0JFX1	Q0JFX1_ORYSJ	LOC_Os01g72680.1
LOC_Os01g72690	Q0JFX0	Q0JFX0_ORYSJ	LOC_Os01g72690.1
LOC_Os01g72710	Q5JK51	Q5JK51_ORYSJ	LOC_Os01g72710.1
LOC_Os01g72720	Q5JK49	Q5JK49_ORYSJ	LOC_Os01g72720.1
LOC_Os01g74130	Q5ZCQ0	Q5ZCQ0_ORYSJ	LOC_Os01g74130.1
LOC_Os01g74140	Q5JM93	Q5JM93_ORYSJ	LOC_Os01g74140.1
LOC_Os01g74146	Q5JM92	Q5JM92_ORYSJ	LOC_Os01g74146.1
LOC_Os01g74152	Q5JM91	Q5JM91_ORYSJ	LOC_Os01g74152.1
LOC_Os01g74160	C7IXP4	C7IXP4_ORYSJ	LOC_Os01g74160.1
LOC_Os01g74170	Q0JFL9	Q0JFL9_ORYSJ	LOC_Os01g74170.1
LOC_Os01g74180	Q0JFL8	Q0JFL8_ORYSJ	LOC_Os01g74180.1
LOC_Os01g74190	Q5JM88	Q5JM88_ORYSJ	LOC_Os01g74190.1
LOC_Os01g74200	Q5JM84	Q5JM84_ORYSJ	LOC_Os01g74200.1
LOC_Os01g74210	Q5JM87	Q5JM87_ORYSJ	LOC_Os01g74210.1
LOC_Os01g74310	Q0JFL1	Q0JFL1_ORYSJ	LOC_Os01g74310.1
LOC_Os01g74330	Q5JL22	Q5JL22_ORYSJ	LOC_Os01g74330.1
LOC_Os01g74350	Q5JL11	Q5JL11_ORYSJ	LOC_Os01g74350.1
LOC_Os01g74370	Q0JFK4	Q0JFK4_ORYSJ	LOC_Os01g74370.1
LOC_Os01g74380	NA	NA	LOC_Os01g74380.1
LOC_Os01g74390	Q75IN3	Q75IN3_ORYSJ	LOC_Os01g74390.1
LOC_Os01g74400	NA	NA	LOC_Os01g74400.1
LOC_Os01g74410	Q0JFK3	Q0JFK3_ORYSJ	LOC_Os01g74410.1
LOC_Os01g74430	Q5JL10	Q5JL10_ORYSJ	LOC_Os01g74430.1
LOC_Os01g74440	Q94CT0	Q94CT0_ORYSJ	LOC_Os01g74440.1
LOC_Os01g74460	Q5JL08	MON1_ORYSJ	LOC_Os01g74460.1
LOC_Os01g74470	Q0JFK0	Q0JFK0_ORYSJ	LOC_Os01g74470.1
LOC_Os01g74480	Q94CS6	Q94CS6_ORYSJ	LOC_Os01g74480.1
LOC_Os01g74500	Q5JL06	Q5JL06_ORYSJ	LOC_Os01g74500.1
LOC_Os01g74510	Q5JNC1	Q5JNC1_ORYSJ	LOC_Os01g74510.1
LOC_Os01g74530	Q5JNC2	Q5JNC2_ORYSJ	LOC_Os01g74530.1
LOC_Os01g74540	Q5JNB8	Q5JNB8_ORYSJ	LOC_Os01g74540.1
LOC_Os01g74550	Q5JNB7	Q5JNB7_ORYSJ	LOC_Os01g74550.1
LOC_Os01g74560	Q84SF3	Q84SF3_ORYSJ	LOC_Os01g74560.1
LOC_Os01g74570	Q84SF2	Q84SF2_ORYSJ	LOC_Os01g74570.1
LOC_Os01g74590	Q84SF0	Q84SF0_ORYSJ	LOC_Os01g74590.1
LOC_Os01g74600	Q5JNB4	Q5JNB4_ORYSJ	LOC_Os01g74600.1
LOC_Os01g74610	Q5JNB3	Q5JNB3_ORYSJ	LOC_Os01g74610.1
LOC_Os01g74620	Q5JNB2	Q5JNB2_ORYSJ	LOC_Os01g74620.1
LOC_Os01g74630	Q5JNB1	Q5JNB1_ORYSJ	LOC_Os01g74630.1
LOC_Os01g74640	Q0JFI8	Q0JFI8_ORYSJ	LOC_Os01g74640.1
LOC_Os01g74650	Q5JNB0	Q5JNB0_ORYSJ	LOC_Os01g74650.1
LOC_Os01g74660	Q84SE2	Q84SE2_ORYSJ	LOC_Os01g74660.1
LOC_Os01g74670	Q5JCU4	Q5JCU4_ORYSJ	LOC_Os01g74670.1
LOC_Os02g01570	NA	NA	LOC_Os02g01570.1
LOC_Os02g04150	NA	NA	LOC_Os02g04150.1
LOC_Os02g04660	Q6YXZ7	ANM5_ORYSJ	LOC_Os02g04660.1
LOC_Os02g04760	NA	NA	LOC_Os02g04760.1
LOC_Os02g04770	Q6Z2X2	Q6Z2X2_ORYSJ	LOC_Os02g04770.1
LOC_Os02g04780	Q6Z2X0	Q6Z2X0_ORYSJ	LOC_Os02g04780.1
LOC_Os02g04790	Q6Z2W9	Q6Z2W9_ORYSJ	LOC_Os02g04790.1
LOC_Os02g04810	Q6Z2W3	ARFE_ORYSJ	LOC_Os02g04810.1
LOC_Os02g04820	NA	NA	LOC_Os02g04820.1
LOC_Os02g04830	NA	NA	LOC_Os02g04830.1
LOC_Os02g04840	Q6YX79	Q6YX79_ORYSJ	LOC_Os02g04840.1
LOC_Os02g04850	Q8RUU7	Q8RUU7_ORYSJ	LOC_Os02g04850.1
LOC_Os02g04910	NA	NA	LOC_Os02g04910.1
LOC_Os02g04940	NA	NA	LOC_Os02g04940.1
LOC_Os02g04945	NA	NA	LOC_Os02g04945.1
LOC_Os02g04960	Q6YWG0	Q6YWG0_ORYSJ	LOC_Os02g04960.1
LOC_Os02g04970	C7IY25	C7IY25_ORYSJ	LOC_Os02g04970.1
LOC_Os02g04980	NA	NA	LOC_Os02g04980.1
LOC_Os02g04990	Q6YWF6	Q6YWF6_ORYSJ	LOC_Os02g04990.1
LOC_Os02g05000	Q6YWG9	Q6YWG9_ORYSJ	LOC_Os02g05000.1
LOC_Os02g05030	Q6YXW6	SPP2_ORYSJ	LOC_Os02g05030.1
LOC_Os02g05040	Q6YXW5	Q6YXW5_ORYSJ	LOC_Os02g05040.1
LOC_Os02g05090	NA	NA	LOC_Os02g05090.1
LOC_Os02g05120	Q6YXV7	Q6YXV7_ORYSJ	LOC_Os02g05120.1
LOC_Os02g05150	NA	NA	LOC_Os02g05150.1
LOC_Os02g05160	NA	NA	LOC_Os02g05160.1
LOC_Os02g05170	NA	NA	LOC_Os02g05170.1
LOC_Os02g05180	NA	NA	LOC_Os02g05180.1
LOC_Os02g05220	NA	NA	LOC_Os02g05220.1
LOC_Os02g05240	Q6YXV2	Q6YXV2_ORYSJ	LOC_Os02g05240.1
LOC_Os02g05260	NA	NA	LOC_Os02g05260.1
LOC_Os02g05270	Q6YXU9	Q6YXU9_ORYSJ	LOC_Os02g05270.1
LOC_Os02g05290	Q6YXU7	Q6YXU7_ORYSJ	LOC_Os02g05290.1
LOC_Os02g05390	NA	NA	LOC_Os02g05390.1
LOC_Os02g05400	NA	NA	LOC_Os02g05400.1
LOC_Os02g05410	Q0E3Z1	Q0E3Z1_ORYSJ	LOC_Os02g05410.1
LOC_Os02g05450	Q6Z441	Q6Z441_ORYSJ	LOC_Os02g05450.1
LOC_Os02g05460	Q6Z440	Q6Z440_ORYSJ	LOC_Os02g05460.1
LOC_Os02g07410	C7IY93	C7IY93_ORYSJ	LOC_Os02g07410.1
LOC_Os02g07420	Q6H712	Q6H712_ORYSJ	LOC_Os02g07420.1
LOC_Os02g07430	Q0E3J6	Q0E3J6_ORYSJ	LOC_Os02g07430.1
LOC_Os02g07440	Q6H709	Q6H709_ORYSJ	LOC_Os02g07440.1
LOC_Os02g07450	Q6H707	Q6H707_ORYSJ	LOC_Os02g07450.1
LOC_Os02g07460	NA	NA	LOC_Os02g07460.1
LOC_Os02g07480	Q6H704	Q6H704_ORYSJ	LOC_Os02g07480.1
LOC_Os02g07490	Q6H703	Q6H703_ORYSJ	LOC_Os02g07490.1
LOC_Os02g07495	NA	NA	LOC_Os02g07495.1
LOC_Os02g07500	Q6H702	Q6H702_ORYSJ	LOC_Os02g07500.1
LOC_Os02g07510	Q6H6Z9	Q6H6Z9_ORYSJ	LOC_Os02g07510.1
LOC_Os02g07520	NA	NA	LOC_Os02g07520.1
LOC_Os02g07540	NA	NA	LOC_Os02g07540.1
LOC_Os02g07575	Q6H6Z7	Q6H6Z7_ORYSJ	LOC_Os02g07575.1
LOC_Os02g07580	Q6H6Z6	Q6H6Z6_ORYSJ	LOC_Os02g07580.1
LOC_Os02g07600	Q6H6Z5	Q6H6Z5_ORYSJ	LOC_Os02g07600.1
LOC_Os02g07610	NA	NA	LOC_Os02g07610.1
LOC_Os02g07624	Q6H6Z3	Q6H6Z3_ORYSJ	LOC_Os02g07624.1
LOC_Os02g07640	Q6H518	Q6H518_ORYSJ	LOC_Os02g07640.1
LOC_Os02g07650	Q6H517	Q6H517_ORYSJ	LOC_Os02g07650.1
LOC_Os02g07670	Q0E3I9	URED_ORYSJ	LOC_Os02g07670.1
LOC_Os02g07730	Q0E3I3	Q0E3I3_ORYSJ	LOC_Os02g07730.1
LOC_Os02g07740	Q6H512	Q6H512_ORYSJ	LOC_Os02g07740.1
LOC_Os02g07750	Q6H511	Q6H511_ORYSJ	LOC_Os02g07750.1
LOC_Os02g07760	B9F3B6	SSDH_ORYSJ	LOC_Os02g07760.1
LOC_Os02g07770	Q6H510	Q6H510_ORYSJ	LOC_Os02g07770.1
LOC_Os02g10910	NA	NA	LOC_Os02g10910.1
LOC_Os02g10920	Q6Z6E6	Q6Z6E6_ORYSJ	LOC_Os02g10920.1
LOC_Os02g10930	Q6Z6E4	Q6Z6E4_ORYSJ	LOC_Os02g10930.1
LOC_Os02g10940	Q6Z6E3	Q6Z6E3_ORYSJ	LOC_Os02g10940.1
LOC_Os02g10950	Q6Z6E2	Q6Z6E2_ORYSJ	LOC_Os02g10950.1
LOC_Os02g10960	Q6Z6E1	Q6Z6E1_ORYSJ	LOC_Os02g10960.1
LOC_Os02g10990	Q0E2Y1	UVR3_ORYSJ	LOC_Os02g10990.1
LOC_Os02g11636	NA	NA	LOC_Os02g11636.1
LOC_Os02g11660	NA	NA	LOC_Os02g11660.1
LOC_Os02g11710	NA	NA	LOC_Os02g11710.1
LOC_Os02g11720	Q0E2W9	Q0E2W9_ORYSJ	LOC_Os02g11720.1
LOC_Os02g11740	Q0E2W7	Q0E2W7_ORYSJ	LOC_Os02g11740.1
LOC_Os02g11820	Q6H8D7	Q6H8D7_ORYSJ	LOC_Os02g11820.1
LOC_Os02g11830	Q6H8D6	COB23_ORYSJ	LOC_Os02g11830.1
LOC_Os02g11940	C7IY51	C7IY51_ORYSJ	LOC_Os02g11940.1
LOC_Os02g12090	Q6H833	Q6H833_ORYSJ	LOC_Os02g12090.1
LOC_Os02g12200	C7IY52	C7IY52_ORYSJ	LOC_Os02g12200.1
LOC_Os02g12240	NA	NA	LOC_Os02g12240.1
LOC_Os02g12380	Q0E2T7	Q0E2T7_ORYSJ	LOC_Os02g12380.1
LOC_Os02g12400	Q6YV01	Q6YV01_ORYSJ	LOC_Os02g12400.1
LOC_Os02g12840	Q6YW39	Q6YW39_ORYSJ	LOC_Os02g12840.1
LOC_Os02g12870	Q0E2Q1	Q0E2Q1_ORYSJ	LOC_Os02g12870.1
LOC_Os02g12960	Q6YVG0	Q6YVG0_ORYSJ	LOC_Os02g12960.1
LOC_Os02g13810	I6PL68	HEI10_ORYSJ	LOC_Os02g13810.1
LOC_Os02g14330	NA	NA	LOC_Os02g14330.1
LOC_Os02g14340	NA	NA	LOC_Os02g14340.1
LOC_Os02g15780	Q6ETP9	Q6ETP9_ORYSJ	LOC_Os02g15780.1
LOC_Os02g15790	NA	NA	LOC_Os02g15790.1
LOC_Os02g15800	Q6ETP6	Q6ETP6_ORYSJ	LOC_Os02g15800.1
LOC_Os02g15810	Q0E2A0	Q0E2A0_ORYSJ	LOC_Os02g15810.1
LOC_Os02g15820	Q6K2T0	Q6K2T0_ORYSJ	LOC_Os02g15820.1
LOC_Os02g15830	NA	NA	LOC_Os02g15830.1
LOC_Os02g15840	Q6K2S8	Q6K2S8_ORYSJ	LOC_Os02g15840.1
LOC_Os02g15850	Q6K251	Q6K251_ORYSJ	LOC_Os02g15850.1
LOC_Os02g15860	Q6K249	Q6K249_ORYSJ	LOC_Os02g15860.1
LOC_Os02g15870	Q0E297	Q0E297_ORYSJ	LOC_Os02g15870.1
LOC_Os02g15880	Q0E296	Q0E296_ORYSJ	LOC_Os02g15880.1
LOC_Os02g15890	NA	NA	LOC_Os02g15890.1
LOC_Os02g15900	Q6K241	Q6K241_ORYSJ	LOC_Os02g15900.1
LOC_Os02g15910	Q6K240	Q6K240_ORYSJ	LOC_Os02g15910.1
LOC_Os02g15920	Q6K239	Q6K239_ORYSJ	LOC_Os02g15920.1
LOC_Os02g15930	Q6K237	Q6K237_ORYSJ	LOC_Os02g15930.1
LOC_Os02g15950	Q0E293	Q0E293_ORYSJ	LOC_Os02g15950.1
LOC_Os02g16030	Q6K2U1	Q6K2U1_ORYSJ	LOC_Os02g16030.1
LOC_Os02g16050	NA	NA	LOC_Os02g16050.1
LOC_Os02g16080	NA	NA	LOC_Os02g16080.1
LOC_Os02g16140	NA	NA	LOC_Os02g16140.1
LOC_Os02g16150	NA	NA	LOC_Os02g16150.1
LOC_Os02g16190	NA	NA	LOC_Os02g16190.1
LOC_Os02g16200	NA	NA	LOC_Os02g16200.1
LOC_Os02g16210	NA	NA	LOC_Os02g16210.1
LOC_Os02g16220	Q6K2T2	Q6K2T2_ORYSJ	LOC_Os02g16220.1
LOC_Os02g16230	Q6ER30	Q6ER30_ORYSJ	LOC_Os02g16230.1
LOC_Os02g16260	Q0E283	Q0E283_ORYSJ	LOC_Os02g16260.1
LOC_Os02g16290	Q6EPC3	Q6EPC3_ORYSJ	LOC_Os02g16290.1
LOC_Os02g16310	Q6EPC1	Q6EPC1_ORYSJ	LOC_Os02g16310.1
LOC_Os02g16320	Q6EPC0	Q6EPC0_ORYSJ	LOC_Os02g16320.1
LOC_Os02g16340	NA	NA	LOC_Os02g16340.1
LOC_Os02g16380	NA	NA	LOC_Os02g16380.1
LOC_Os02g16400	NA	NA	LOC_Os02g16400.1
LOC_Os02g16500	NA	NA	LOC_Os02g16500.1
LOC_Os02g16520	NA	NA	LOC_Os02g16520.1
LOC_Os02g16544	NA	NA	LOC_Os02g16544.1
LOC_Os02g16550	Q6ETY0	Q6ETY0_ORYSJ	LOC_Os02g16550.1
LOC_Os02g16560	Q7Y1K6	Q7Y1K6_ORYSJ	LOC_Os02g16560.1
LOC_Os02g16570	Q6ETX7	Q6ETX7_ORYSJ	LOC_Os02g16570.1
LOC_Os02g16580	NA	NA	LOC_Os02g16580.1
LOC_Os02g16590	NA	NA	LOC_Os02g16590.1
LOC_Os02g16600	Q0E274	Q0E274_ORYSJ	LOC_Os02g16600.1
LOC_Os02g16610	NA	NA	LOC_Os02g16610.1
LOC_Os02g16620	Q6ETX5	Q6ETX5_ORYSJ	LOC_Os02g16620.1
LOC_Os02g16630	Q0E272	Q0E272_ORYSJ	LOC_Os02g16630.1
LOC_Os02g16650	Q6ETX2	Q6ETX2_ORYSJ	LOC_Os02g16650.1
LOC_Os02g16660	Q6ETX1	Q6ETX1_ORYSJ	LOC_Os02g16660.1
LOC_Os02g16670	C7IY54	C7IY54_ORYSJ	LOC_Os02g16670.1
LOC_Os02g16830	Q0E261	Q0E261_ORYSJ	LOC_Os02g16830.1
LOC_Os02g19340	NA	NA	LOC_Os02g19340.1
LOC_Os02g20080	Q7X824	Q7X824_ORYSJ	LOC_Os02g20080.1
LOC_Os02g20260	NA	NA	LOC_Os02g20260.1
LOC_Os02g23820	NA	NA	LOC_Os02g23820.1
LOC_Os02g30660	Q6K789	Q6K789_ORYSJ	LOC_Os02g30660.1
LOC_Os02g32370	Q6H545	IPK2_ORYSJ	LOC_Os02g32370.1
LOC_Os02g33250	NA	NA	LOC_Os02g33250.1
LOC_Os02g33944	Q0E0J8	Q0E0J8_ORYSJ	LOC_Os02g33944.1
LOC_Os02g34070	Q6YWI1	Q6YWI1_ORYSJ	LOC_Os02g34070.1
LOC_Os02g34090	NA	NA	LOC_Os02g34090.1
LOC_Os02g34100	NA	NA	LOC_Os02g34100.1
LOC_Os02g34120	C7J6H2	C7J6H2_ORYSJ	LOC_Os02g34120.1
LOC_Os02g34130	NA	NA	LOC_Os02g34130.1
LOC_Os02g34140	Q6YWH4	Q6YWH4_ORYSJ	LOC_Os02g34140.1
LOC_Os02g34150	NA	NA	LOC_Os02g34150.1
LOC_Os02g34160	NA	NA	LOC_Os02g34160.1
LOC_Os02g34190	Q0E0J5	Q0E0J5_ORYSJ	LOC_Os02g34190.1
LOC_Os02g34200	NA	NA	LOC_Os02g34200.1
LOC_Os02g34240	NA	NA	LOC_Os02g34240.1
LOC_Os02g34390	Q6YYG2	Q6YYG2_ORYSJ	LOC_Os02g34390.1
LOC_Os02g34450	NA	NA	LOC_Os02g34450.1
LOC_Os02g34490	Q6Z103	Q6Z103_ORYSJ	LOC_Os02g34490.1
LOC_Os02g35260	NA	NA	LOC_Os02g35260.1
LOC_Os02g35580	Q6Z7F6	Q6Z7F6_ORYSJ	LOC_Os02g35580.1
LOC_Os02g35630	Q0E0B4	Q0E0B4_ORYSJ	LOC_Os02g35630.1
LOC_Os02g35760	Q6Z7D9	Q6Z7D9_ORYSJ	LOC_Os02g35760.1
LOC_Os02g35790	NA	NA	LOC_Os02g35790.1
LOC_Os02g35910	Q6YTI2	P2C15_ORYSJ	LOC_Os02g35910.1
LOC_Os02g36020	Q6YTF8	Q6YTF8_ORYSJ	LOC_Os02g36020.1
LOC_Os02g36040	Q6YTF4	Q6YTF4_ORYSJ	LOC_Os02g36040.1
LOC_Os02g36050	NA	NA	LOC_Os02g36050.1
LOC_Os02g36060	NA	NA	LOC_Os02g36060.1
LOC_Os02g36100	NA	NA	LOC_Os02g36100.1
LOC_Os02g36110	Q6YTE2	Q6YTE2_ORYSJ	LOC_Os02g36110.1
LOC_Os02g36140	Q0E088	KSL7_ORYSJ	LOC_Os02g36140.1
LOC_Os02g36150	A3A871	C71Z6_ORYSJ	LOC_Os02g36150.1
LOC_Os02g36160	NA	NA	LOC_Os02g36160.1
LOC_Os02g36180	Q6YV89	Q6YV89_ORYSJ	LOC_Os02g36180.1
LOC_Os02g36190	Q6YV88	C71Z7_ORYSJ	LOC_Os02g36190.1
LOC_Os02g36200	Q8H4R0	Q8H4R0_ORYSJ	LOC_Os02g36200.1
LOC_Os02g36210	C7IY39	C7IY39_ORYSJ	LOC_Os02g36210.1
LOC_Os02g36220	Q6Z5J6	KSL5_ORYSJ	LOC_Os02g36220.1
LOC_Os02g36230	NA	NA	LOC_Os02g36230.1
LOC_Os02g36250	NA	NA	LOC_Os02g36250.1
LOC_Os02g36264	Q6Z5I8	Q6Z5I8_ORYSJ	LOC_Os02g36264.1
LOC_Os02g36280	Q6Z5I7	C76M6_ORYSJ	LOC_Os02g36280.1
LOC_Os02g36285	NA	NA	LOC_Os02g36285.1
LOC_Os02g36290	NA	NA	LOC_Os02g36290.1
LOC_Os02g36300	Q6Z5I5	Q6Z5I5_ORYSJ	LOC_Os02g36300.1
LOC_Os02g36320	NA	NA	LOC_Os02g36320.1
LOC_Os02g36330	Q6Z5I2	Q6Z5I2_ORYSJ	LOC_Os02g36330.1
LOC_Os02g36340	Q0E079	RIBA2_ORYSJ	LOC_Os02g36340.1
LOC_Os02g36350	Q6YXC6	Q6YXC6_ORYSJ	LOC_Os02g36350.1
LOC_Os02g36360	Q6YXC5	Q6YXC5_ORYSJ	LOC_Os02g36360.1
LOC_Os02g36370	Q6YXC3	Q6YXC3_ORYSJ	LOC_Os02g36370.1
LOC_Os02g36440	Q0E070	Q0E070_ORYSJ	LOC_Os02g36440.1
LOC_Os02g36470	NA	NA	LOC_Os02g36470.1
LOC_Os02g36500	Q69S88	Q69S88_ORYSJ	LOC_Os02g36500.1
LOC_Os02g36505	NA	NA	LOC_Os02g36505.1
LOC_Os02g36540	Q69S82	Q69S82_ORYSJ	LOC_Os02g36540.1
LOC_Os02g36550	Q69S81	PPCS1_ORYSJ	LOC_Os02g36550.1
LOC_Os02g36560	Q69S80	Q69S80_ORYSJ	LOC_Os02g36560.1
LOC_Os02g36570	Q69S72	Q69S72_ORYSJ	LOC_Os02g36570.1
LOC_Os02g36580	Q69JW9	Q69JW9_ORYSJ	LOC_Os02g36580.1
LOC_Os02g36590	NA	NA	LOC_Os02g36590.1
LOC_Os02g36600	Q69JW7	Q69JW7_ORYSJ	LOC_Os02g36600.1
LOC_Os02g36619	Q69JW6	Q69JW6_ORYSJ	LOC_Os02g36619.1
LOC_Os02g36640	NA	NA	LOC_Os02g36640.1
LOC_Os02g36670	NA	NA	LOC_Os02g36670.1
LOC_Os02g36680	Q69JW4	Q69JW4_ORYSJ	LOC_Os02g36680.1
LOC_Os02g36690	NA	NA	LOC_Os02g36690.1
LOC_Os02g36700	Q69JW3	SUT5_ORYSJ	LOC_Os02g36700.1
LOC_Os02g36720	NA	NA	LOC_Os02g36720.1
LOC_Os02g36740	Q69JV9	Q69JV9_ORYSJ	LOC_Os02g36740.1
LOC_Os02g36760	Q69JV7	Q69JV7_ORYSJ	LOC_Os02g36760.1
LOC_Os02g36780	Q69JV5	Q69JV5_ORYSJ	LOC_Os02g36780.1
LOC_Os02g36790	NA	NA	LOC_Os02g36790.1
LOC_Os02g36800	NA	NA	LOC_Os02g36800.1
LOC_Os02g36810	Q0E052	Q0E052_ORYSJ	LOC_Os02g36810.1
LOC_Os02g36820	Q69JV1	Q69JV1_ORYSJ	LOC_Os02g36820.1
LOC_Os02g36830	Q69JV0	Q69JV0_ORYSJ	LOC_Os02g36830.1
LOC_Os02g36845	Q6EP58	CASP7_ORYSJ	LOC_Os02g36845.1
LOC_Os02g36850	Q6EP57	Q6EP57_ORYSJ	LOC_Os02g36850.1
LOC_Os02g36870	Q6EP55	Q6EP55_ORYSJ	LOC_Os02g36870.1
LOC_Os02g36880	Q6EP52	Q6EP52_ORYSJ	LOC_Os02g36880.1
LOC_Os02g36890	Q6EP51	Q6EP51_ORYSJ	LOC_Os02g36890.1
LOC_Os02g36910	NA	NA	LOC_Os02g36910.1
LOC_Os02g36924	Q7XUV3	Q7XUV3_ORYSJ	LOC_Os02g36924.1
LOC_Os02g36940	Q0JCM6	Q0JCM6_ORYSJ	LOC_Os02g36940.1
LOC_Os02g36950	Q0E042	Q0E042_ORYSJ	LOC_Os02g36950.1
LOC_Os02g36960	Q6EP45	Q6EP45_ORYSJ	LOC_Os02g36960.1
LOC_Os02g36974	Q0E040	Q0E040_ORYSJ	LOC_Os02g36974.1
LOC_Os02g37010	Q6EP39	Q6EP39_ORYSJ	LOC_Os02g37010.1
LOC_Os02g37060	NA	NA	LOC_Os02g37060.1
LOC_Os02g37080	Q0E030	Q0E030_ORYSJ	LOC_Os02g37080.1
LOC_Os02g37100	B7F8J9	B7F8J9_ORYSJ	LOC_Os02g37100.1
LOC_Os02g37120	C7IYS9	C7IYS9_ORYSJ	LOC_Os02g37120.1
LOC_Os02g37270	Q6YY37	Q6YY37_ORYSJ	LOC_Os02g37270.1
LOC_Os02g37330	Q6YY29	Q6YY29_ORYSJ	LOC_Os02g37330.1
LOC_Os02g37540	NA	NA	LOC_Os02g37540.1
LOC_Os02g37570	NA	NA	LOC_Os02g37570.1
LOC_Os02g37990	NA	NA	LOC_Os02g37990.1
LOC_Os02g38050	Q6ZH84	Q6ZH84_ORYSJ	LOC_Os02g38050.1
LOC_Os02g38990	Q6K5G0	Q6K5G0_ORYSJ	LOC_Os02g38990.1
LOC_Os02g39080	NA	NA	LOC_Os02g39080.1
LOC_Os02g39090	Q0DZR2	Q0DZR2_ORYSJ	LOC_Os02g39090.1
LOC_Os02g39130	C7J4Z9	C7J4Z9_ORYSJ	LOC_Os02g39130.1
LOC_Os02g39780	NA	NA	LOC_Os02g39780.1
LOC_Os02g39900	NA	NA	LOC_Os02g39900.1
LOC_Os02g40220	NA	NA	LOC_Os02g40220.1
LOC_Os02g40250	NA	NA	LOC_Os02g40250.1
LOC_Os02g41580	Q6K1R8	Q6K1R8_ORYSJ	LOC_Os02g41580.1
LOC_Os02g41730	Q6K228	Q6K228_ORYSJ	LOC_Os02g41730.1
LOC_Os02g41830	NA	NA	LOC_Os02g41830.1
LOC_Os02g41850	Q6K216	Q6K216_ORYSJ	LOC_Os02g41850.1
LOC_Os02g41860	Q6K215	PIP22_ORYSJ	LOC_Os02g41860.1
LOC_Os02g41890	Q6K213	Q6K213_ORYSJ	LOC_Os02g41890.1
LOC_Os02g41920	Q6K206	Q6K206_ORYSJ	LOC_Os02g41920.1
LOC_Os02g42374	Q0DZA4	Q0DZA4_ORYSJ	LOC_Os02g42374.1
LOC_Os02g42420	C7IYX4	C7IYX4_ORYSJ	LOC_Os02g42420.1
LOC_Os02g42585	Q6H5V2	Q6H5V2_ORYSJ	LOC_Os02g42585.1
LOC_Os02g42980	Q6H665	Q6H665_ORYSJ	LOC_Os02g42980.1
LOC_Os02g43010	Q0DZ62	Q0DZ62_ORYSJ	LOC_Os02g43010.1
LOC_Os02g43030	Q6H658	VITH1_ORYSJ	LOC_Os02g43030.1
LOC_Os02g43050	Q0DZ59	Q0DZ59_ORYSJ	LOC_Os02g43050.1
LOC_Os02g43070	Q6H645	Q6H645_ORYSJ	LOC_Os02g43070.1
LOC_Os02g43080	NA	NA	LOC_Os02g43080.1
LOC_Os02g43090	Q6H643	Q6H643_ORYSJ	LOC_Os02g43090.1
LOC_Os02g43100	Q6H642	Q6H642_ORYSJ	LOC_Os02g43100.1
LOC_Os02g43110	Q6H641	MHX2_ORYSJ	LOC_Os02g43110.1
LOC_Os02g43120	Q6H639	Q6H639_ORYSJ	LOC_Os02g43120.1
LOC_Os02g43130	Q6H638	KN7C_ORYSJ	LOC_Os02g43130.1
LOC_Os02g43140	NA	NA	LOC_Os02g43140.1
LOC_Os02g43150	Q0JBD6	Q0JBD6_ORYSJ	LOC_Os02g43150.1
LOC_Os02g43250	Q6H6X2	Q6H6X2_ORYSJ	LOC_Os02g43250.1
LOC_Os02g44140	NA	NA	LOC_Os02g44140.1
LOC_Os02g44150	NA	NA	LOC_Os02g44150.1
LOC_Os02g44180	NA	NA	LOC_Os02g44180.1
LOC_Os02g44310	Q6H6L9	Q6H6L9_ORYSJ	LOC_Os02g44310.1
LOC_Os02g44470	Q6EUH7	ADF1_ORYSJ	LOC_Os02g44470.1
LOC_Os02g44642	Q6ESH1	Q6ESH1_ORYSJ	LOC_Os02g44642.1
LOC_Os02g44700	Q6EU86	Q6EU86_ORYSJ	LOC_Os02g44700.1
LOC_Os02g45370	NA	NA	LOC_Os02g45370.1
LOC_Os02g45510	NA	NA	LOC_Os02g45510.1
LOC_Os02g46040	NA	NA	LOC_Os02g46040.1
LOC_Os02g46070	C7J9W8	C7J9W8_ORYSJ	LOC_Os02g46070.1
LOC_Os02g46200	NA	NA	LOC_Os02g46200.1
LOC_Os02g46230	NA	NA	LOC_Os02g46230.1
LOC_Os02g46310	Q6ZGZ8	Q6ZGZ8_ORYSJ	LOC_Os02g46310.1
LOC_Os02g47710	Q6Z2G1	Q6Z2G1_ORYSJ	LOC_Os02g47710.1
LOC_Os02g47960	NA	NA	LOC_Os02g47960.1
LOC_Os02g48250	NA	NA	LOC_Os02g48250.1
LOC_Os02g48420	NA	NA	LOC_Os02g48420.1
LOC_Os02g48500	Q6ZHP4	Q6ZHP4_ORYSJ	LOC_Os02g48500.1
LOC_Os02g48510	NA	NA	LOC_Os02g48510.1
LOC_Os02g49150	Q6Z5M2	Q6Z5M2_ORYSJ	LOC_Os02g49150.1
LOC_Os02g49200	Q6Z5L7	Q6Z5L7_ORYSJ	LOC_Os02g49200.1
LOC_Os02g49480	Q6Z339	Q6Z339_ORYSJ	LOC_Os02g49480.1
LOC_Os02g50320	Q6Z746	MP702_ORYSJ	LOC_Os02g50320.1
LOC_Os02g50610	Q6ERF6	Q6ERF6_ORYSJ	LOC_Os02g50610.1
LOC_Os02g50680	Q6Z7T4	Q6Z7T4_ORYSJ	LOC_Os02g50680.1
LOC_Os02g51090	Q6Z2T5	Q6Z2T5_ORYSJ	LOC_Os02g51090.1
LOC_Os02g51130	Q6ZGT9	Q6ZGT9_ORYSJ	LOC_Os02g51130.1
LOC_Os02g51200	Q6YWY4	Q6YWY4_ORYSJ	LOC_Os02g51200.1
LOC_Os02g51230	Q5Z562	Q5Z562_ORYSJ	LOC_Os02g51230.1
LOC_Os02g51260	Q6YUX9	Q6YUX9_ORYSJ	LOC_Os02g51260.1
LOC_Os02g51540	Q6Z8K1	Q6Z8K1_ORYSJ	LOC_Os02g51540.1
LOC_Os02g51640	Q6Z8I6	Q6Z8I6_ORYSJ	LOC_Os02g51640.1
LOC_Os02g51920	NA	NA	LOC_Os02g51920.1
LOC_Os02g51980	NA	NA	LOC_Os02g51980.1
LOC_Os02g52010	Q6Z676	Q6Z676_ORYSJ	LOC_Os02g52010.1
LOC_Os02g52020	NA	NA	LOC_Os02g52020.1
LOC_Os02g52070	NA	NA	LOC_Os02g52070.1
LOC_Os02g52080	NA	NA	LOC_Os02g52080.1
LOC_Os02g52090	NA	NA	LOC_Os02g52090.1
LOC_Os02g52100	NA	NA	LOC_Os02g52100.1
LOC_Os02g52110	Q6L4W1	Q6L4W1_ORYSJ	LOC_Os02g52110.1
LOC_Os02g52220	Q6Z7U2	Q6Z7U2_ORYSJ	LOC_Os02g52220.1
LOC_Os02g52350	NA	NA	LOC_Os02g52350.1
LOC_Os02g52520	NA	NA	LOC_Os02g52520.1
LOC_Os02g52550	Q6Z6F9	Q6Z6F9_ORYSJ	LOC_Os02g52550.1
LOC_Os02g52690	NA	NA	LOC_Os02g52690.1
LOC_Os02g52830	Q6Z307	Q6Z307_ORYSJ	LOC_Os02g52830.1
LOC_Os02g52840	Q6Z306	Q6Z306_ORYSJ	LOC_Os02g52840.1
LOC_Os02g52860	O80414	O80414_ORYSJ	LOC_Os02g52860.1
LOC_Os02g53550	NA	NA	LOC_Os02g53550.1
LOC_Os02g53610	NA	NA	LOC_Os02g53610.1
LOC_Os02g53835	NA	NA	LOC_Os02g53835.1
LOC_Os02g53990	Q6K7F3	Q6K7F3_ORYSJ	LOC_Os02g53990.1
LOC_Os02g53994	C7IZ21	C7IZ21_ORYSJ	LOC_Os02g53994.1
LOC_Os02g54000	Q6K833	MCES2_ORYSJ	LOC_Os02g54000.1
LOC_Os02g54020	Q0DX17	Q0DX17_ORYSJ	LOC_Os02g54020.1
LOC_Os02g54030	Q0DX16	Q0DX16_ORYSJ	LOC_Os02g54030.1
LOC_Os02g54040	Q6K828	Q6K828_ORYSJ	LOC_Os02g54040.1
LOC_Os02g54060	Q6K822	Q6K822_ORYSJ	LOC_Os02g54060.1
LOC_Os02g54090	Q6K820	Q6K820_ORYSJ	LOC_Os02g54090.1
LOC_Os02g54280	Q0DWZ8	Q0DWZ8_ORYSJ	LOC_Os02g54280.1
LOC_Os02g54370	Q6K8V8	Q6K8V8_ORYSJ	LOC_Os02g54370.1
LOC_Os02g54610	NA	NA	LOC_Os02g54610.1
LOC_Os02g54650	Q6K4P5	Q6K4P5_ORYSJ	LOC_Os02g54650.1
LOC_Os02g54920	Q6K9M0	Q6K9M0_ORYSJ	LOC_Os02g54920.1
LOC_Os02g55630	Q0DWR2	Q0DWR2_ORYSJ	LOC_Os02g55630.1
LOC_Os02g55790	NA	NA	LOC_Os02g55790.1
LOC_Os02g55810	Q69IJ0	Q69IJ0_ORYSJ	LOC_Os02g55810.1
LOC_Os02g55840	Q0DWQ5	Q0DWQ5_ORYSJ	LOC_Os02g55840.1
LOC_Os02g55860	NA	NA	LOC_Os02g55860.1
LOC_Os02g56240	NA	NA	LOC_Os02g56240.1
LOC_Os02g56250	NA	NA	LOC_Os02g56250.1
LOC_Os02g56360	NA	NA	LOC_Os02g56360.1
LOC_Os02g56420	Q6K9A8	Q6K9A8_ORYSJ	LOC_Os02g56420.1
LOC_Os02g56700	Q6K3G2	Q6K3G2_ORYSJ	LOC_Os02g56700.1
LOC_Os02g57854	Q0JF69	Q0JF69_ORYSJ	LOC_Os02g57854.1
LOC_Os02g57870	Q6KAA2	Q6KAA2_ORYSJ	LOC_Os02g57870.1
LOC_Os02g57880	Q6KAA1	Q6KAA1_ORYSJ	LOC_Os02g57880.1
LOC_Os02g57890	Q0DW92	Q0DW92_ORYSJ	LOC_Os02g57890.1
LOC_Os02g57900	Q6KA99	Q6KA99_ORYSJ	LOC_Os02g57900.1
LOC_Os02g57960	Q6K7S1	Q6K7S1_ORYSJ	LOC_Os02g57960.1
LOC_Os02g58000	Q6K7R7	Q6K7R7_ORYSJ	LOC_Os02g58000.1
LOC_Os02g58770	Q6EP25	Q6EP25_ORYSJ	LOC_Os02g58770.1
LOC_Os03g01060	Q10T63	Q10T63_ORYSJ	LOC_Os03g01060.1
LOC_Os03g01380	Q10T19	Q10T19_ORYSJ	LOC_Os03g01380.1
LOC_Os03g01410	Q10T16	Q10T16_ORYSJ	LOC_Os03g01410.1
LOC_Os03g01490	Q8H7U4	Q8H7U4_ORYSJ	LOC_Os03g01490.1
LOC_Os03g01850	Q0DVX0	Q0DVX0_ORYSJ	LOC_Os03g01850.1
LOC_Os03g01880	Q8H7U8	LOGL3_ORYSJ	LOC_Os03g01880.1
LOC_Os03g01950	Q8H7V5	Q8H7V5_ORYSJ	LOC_Os03g01950.1
LOC_Os03g01970	Q8H7V7	Q8H7V7_ORYSJ	LOC_Os03g01970.1
LOC_Os03g02130	Q10SS8	Q10SS8_ORYSJ	LOC_Os03g02130.1
LOC_Os03g02150	Q0DVU5	Q0DVU5_ORYSJ	LOC_Os03g02150.1
LOC_Os03g02270	Q10SR2	Q10SR2_ORYSJ	LOC_Os03g02270.1
LOC_Os03g02280	Q8GZX5	Q8GZX5_ORYSJ	LOC_Os03g02280.1
LOC_Os03g02290	Q8GZX4	Q8GZX4_ORYSJ	LOC_Os03g02290.1
LOC_Os03g02300	Q8GZX3	Q8GZX3_ORYSJ	LOC_Os03g02300.1
LOC_Os03g02320	Q8GZX1	Q8GZX1_ORYSJ	LOC_Os03g02320.1
LOC_Os03g02330	Q5ZAR1	Q5ZAR1_ORYSJ	LOC_Os03g02330.1
LOC_Os03g02340	Q8GZW9	Q8GZW9_ORYSJ	LOC_Os03g02340.1
LOC_Os03g02370	Q8GZW7	Q8GZW7_ORYSJ	LOC_Os03g02370.1
LOC_Os03g02380	Q10SP9	Q10SP9_ORYSJ	LOC_Os03g02380.1
LOC_Os03g02390	Q8GZW5	Q8GZW5_ORYSJ	LOC_Os03g02390.1
LOC_Os03g02400	Q0DVS6	Q0DVS6_ORYSJ	LOC_Os03g02400.1
LOC_Os03g02410	Q10SP5	Q10SP5_ORYSJ	LOC_Os03g02410.1
LOC_Os03g02420	Q8GZW2	Q8GZW2_ORYSJ	LOC_Os03g02420.1
LOC_Os03g02430	Q0DVS3	Q0DVS3_ORYSJ	LOC_Os03g02430.1
LOC_Os03g02440	Q8GZW0	Q8GZW0_ORYSJ	LOC_Os03g02440.1
LOC_Os03g02460	Q8GZV9	Q8GZV9_ORYSJ	LOC_Os03g02460.1
LOC_Os03g02650	Q10SM1	Q10SM1_ORYSJ	LOC_Os03g02650.1
LOC_Os03g02660	Q10SM0	Q10SM0_ORYSJ	LOC_Os03g02660.1
LOC_Os03g02670	Q10SL9	Q10SL9_ORYSJ	LOC_Os03g02670.1
LOC_Os03g02680	P29618	CDKA1_ORYSJ	LOC_Os03g02680.1
LOC_Os03g02690	Q8H053	Q8H053_ORYSJ	LOC_Os03g02690.1
LOC_Os03g02700	Q8H052	Q8H052_ORYSJ	LOC_Os03g02700.1
LOC_Os03g02720	Q8H050	Q8H050_ORYSJ	LOC_Os03g02720.1
LOC_Os03g02730	Q8H049	Q8H049_ORYSJ	LOC_Os03g02730.1
LOC_Os03g02740	Q0DVP7	Q0DVP7_ORYSJ	LOC_Os03g02740.1
LOC_Os03g02750	Q8H047	Q8H047_ORYSJ	LOC_Os03g02750.1
LOC_Os03g03034	Q8H8H6	Q8H8H6_ORYSJ	LOC_Os03g03034.1
LOC_Os03g03050	Q10SH9	Q10SH9_ORYSJ	LOC_Os03g03050.1
LOC_Os03g03060	Q8H8H4	Q8H8H4_ORYSJ	LOC_Os03g03060.1
LOC_Os03g03070	Q0DVM3	Q0DVM3_ORYSJ	LOC_Os03g03070.1
LOC_Os03g03080	Q8H8H2	Q8H8H2_ORYSJ	LOC_Os03g03080.1
LOC_Os03g03100	Q8H8H1	Q8H8H1_ORYSJ	LOC_Os03g03100.1
LOC_Os03g03120	Q8H8H0	Q8H8H0_ORYSJ	LOC_Os03g03120.1
LOC_Os03g03210	Q10SG2	Q10SG2_ORYSJ	LOC_Os03g03210.1
LOC_Os03g03220	Q10SG1	Q10SG1_ORYSJ	LOC_Os03g03220.1
LOC_Os03g03240	Q10SF9	Q10SF9_ORYSJ	LOC_Os03g03240.1
LOC_Os03g03330	Q10SF1	Q10SF1_ORYSJ	LOC_Os03g03330.1
LOC_Os03g03340	Q10SF0	Q10SF0_ORYSJ	LOC_Os03g03340.1
LOC_Os03g03350	Q5VS63	Q5VS63_ORYSJ	LOC_Os03g03350.1
LOC_Os03g03360	Q10SE8	Q10SE8_ORYSJ	LOC_Os03g03360.1
LOC_Os03g03370	Q0DVK9	Q0DVK9_ORYSJ	LOC_Os03g03370.1
LOC_Os03g03390	Q10SE5	Q10SE5_ORYSJ	LOC_Os03g03390.1
LOC_Os03g03400	Q10SE4	Q10SE4_ORYSJ	LOC_Os03g03400.1
LOC_Os03g03410	Q0DVK6	Q0DVK6_ORYSJ	LOC_Os03g03410.1
LOC_Os03g03420	Q10SE1	Q10SE1_ORYSJ	LOC_Os03g03420.1
LOC_Os03g03430	Q10SD9	Q10SD9_ORYSJ	LOC_Os03g03430.1
LOC_Os03g03440	Q8S5W6	Q8S5W6_ORYSJ	LOC_Os03g03440.1
LOC_Os03g03450	Q8S5W5	Q8S5W5_ORYSJ	LOC_Os03g03450.1
LOC_Os03g03460	Q0DVK1	Q0DVK1_ORYSJ	LOC_Os03g03460.1
LOC_Os03g03470	Q10SD2	Q10SD2_ORYSJ	LOC_Os03g03470.1
LOC_Os03g03480	Q8S5W2	Q8S5W2_ORYSJ	LOC_Os03g03480.1
LOC_Os03g03490	Q8S5W1	Q8S5W1_ORYSJ	LOC_Os03g03490.1
LOC_Os03g03510	Q10SC7	Q10SC7_ORYSJ	LOC_Os03g03510.1
LOC_Os03g03520	Q8S5V8	Q8S5V8_ORYSJ	LOC_Os03g03520.1
LOC_Os03g03910	Q10S81	Q10S81_ORYSJ	LOC_Os03g03910.1
LOC_Os03g04720	Q10RZ5	Q10RZ5_ORYSJ	LOC_Os03g04720.1
LOC_Os03g04760	Q7XT13	Q7XT13_ORYSJ	LOC_Os03g04760.1
LOC_Os03g04810	Q10RY7	Q10RY7_ORYSJ	LOC_Os03g04810.1
LOC_Os03g04860	Q10RY2	Q10RY2_ORYSJ	LOC_Os03g04860.1
LOC_Os03g05000	Q10RW6	Q10RW6_ORYSJ	LOC_Os03g05000.1
LOC_Os03g05210	Q8H033	Q8H033_ORYSJ	LOC_Os03g05210.1
LOC_Os03g05750	Q10RN8	Q10RN8_ORYSJ	LOC_Os03g05750.1
LOC_Os03g06050	Q0DV17	Q0DV17_ORYSJ	LOC_Os03g06050.1
LOC_Os03g06110	Q8LMQ3	Q8LMQ3_ORYSJ	LOC_Os03g06110.1
LOC_Os03g06260	Q8H8B9	Q8H8B9_ORYSJ	LOC_Os03g06260.1
LOC_Os03g06560	Q8H7Y0	Q8H7Y0_ORYSJ	LOC_Os03g06560.1
LOC_Os03g06700	Q8H7Z0	Q8H7Z0_ORYSJ	LOC_Os03g06700.1
LOC_Os03g07930	Q0DUN7	Q0DUN7_ORYSJ	LOC_Os03g07930.1
LOC_Os03g07940	C7J0A4	C7J0A4_ORYSJ	LOC_Os03g07940.1
LOC_Os03g07960	B9FBM2	B9FBM2_ORYSJ	LOC_Os03g07960.1
LOC_Os03g07970	Q0DUN3	Q0DUN3_ORYSJ	LOC_Os03g07970.1
LOC_Os03g07990	Q10R02	Q10R02_ORYSJ	LOC_Os03g07990.1
LOC_Os03g07994	NA	NA	LOC_Os03g07994.1
LOC_Os03g08000	Q10R01	Q10R01_ORYSJ	LOC_Os03g08000.1
LOC_Os03g08010	Q10QZ6	Q10QZ6_ORYSJ	LOC_Os03g08010.1
LOC_Os03g08020	NA	NA	LOC_Os03g08020.1
LOC_Os03g08030	Q10QZ8	Q10QZ8_ORYSJ	LOC_Os03g08030.1
LOC_Os03g08040	Q10QZ7	Q10QZ7_ORYSJ	LOC_Os03g08040.1
LOC_Os03g08050	Q10QZ5	Q10QZ5_ORYSJ	LOC_Os03g08050.1
LOC_Os03g08070	Q8H028	Q8H028_ORYSJ	LOC_Os03g08070.1
LOC_Os03g08080	Q8H027	Q8H027_ORYSJ	LOC_Os03g08080.1
LOC_Os03g08090	Q8H026	Q8H026_ORYSJ	LOC_Os03g08090.1
LOC_Os03g08100	Q10QY8	Q10QY8_ORYSJ	LOC_Os03g08100.1
LOC_Os03g08110	Q8H024	Q8H024_ORYSJ	LOC_Os03g08110.1
LOC_Os03g08114	C7IZT0	C7IZT0_ORYSJ	LOC_Os03g08114.1
LOC_Os03g08150	Q8H021	GL31_ORYSJ	LOC_Os03g08150.1
LOC_Os03g08180	Q8H018	Q8H018_ORYSJ	LOC_Os03g08180.1
LOC_Os03g08190	Q10QX8	Q10QX8_ORYSJ	LOC_Os03g08190.1
LOC_Os03g08210	Q10QX6	Q10QX6_ORYSJ	LOC_Os03g08210.1
LOC_Os03g08710	Q10QS1	Q10QS1_ORYSJ	LOC_Os03g08710.1
LOC_Os03g08754	Q10QR6	Q10QR6_ORYSJ	LOC_Os03g08754.1
LOC_Os03g08770	Q10QR5	Q10QR5_ORYSJ	LOC_Os03g08770.1
LOC_Os03g08800	C7J0E3	C7J0E3_ORYSJ	LOC_Os03g08800.1
LOC_Os03g08810	Q10QR0	Q10QR0_ORYSJ	LOC_Os03g08810.1
LOC_Os03g08820	Q10QQ9	Q10QQ9_ORYSJ	LOC_Os03g08820.1
LOC_Os03g08830	Q0DUG6	Q0DUG6_ORYSJ	LOC_Os03g08830.1
LOC_Os03g08840	Q10QQ7	Q10QQ7_ORYSJ	LOC_Os03g08840.1
LOC_Os03g08850	Q0DUG4	Q0DUG4_ORYSJ	LOC_Os03g08850.1
LOC_Os03g08860	Q10QQ4	Q10QQ4_ORYSJ	LOC_Os03g08860.1
LOC_Os03g08870	Q8H7P3	Q8H7P3_ORYSJ	LOC_Os03g08870.1
LOC_Os03g08880	Q8H7P2	Q8H7P2_ORYSJ	LOC_Os03g08880.1
LOC_Os03g08890	Q10QQ1	Q10QQ1_ORYSJ	LOC_Os03g08890.1
LOC_Os03g08930	Q10QP6	Q10QP6_ORYSJ	LOC_Os03g08930.1
LOC_Os03g08940	Q8H7N7	Q8H7N7_ORYSJ	LOC_Os03g08940.1
LOC_Os03g09080	Q8H7M6	Q8H7M6_ORYSJ	LOC_Os03g09080.1
LOC_Os03g09100	Q0DUE4	Q0DUE4_ORYSJ	LOC_Os03g09100.1
LOC_Os03g09110	Q10QM8	Q10QM8_ORYSJ	LOC_Os03g09110.1
LOC_Os03g09120	Q10QM7	Q10QM7_ORYSJ	LOC_Os03g09120.1
LOC_Os03g09180	Q10QM0	Q10QM0_ORYSJ	LOC_Os03g09180.1
LOC_Os03g09190	Q0DUD7	Q0DUD7_ORYSJ	LOC_Os03g09190.1
LOC_Os03g09200	Q0DUD6	Q0DUD6_ORYSJ	LOC_Os03g09200.1
LOC_Os03g09210	Q10QL6	Q10QL6_ORYSJ	LOC_Os03g09210.1
LOC_Os03g09220	Q10QL5	BIP2C_ORYSJ	LOC_Os03g09220.1
LOC_Os03g09250	Q10QK7	Q10QK7_ORYSJ	LOC_Os03g09250.1
LOC_Os03g09270	Q0DUD0	Q0DUD0_ORYSJ	LOC_Os03g09270.1
LOC_Os03g09280	Q10QK3	Q10QK3_ORYSJ	LOC_Os03g09280.1
LOC_Os03g09300	Q10QK1	Q10QK1_ORYSJ	LOC_Os03g09300.1
LOC_Os03g09810	Q0DUC7	Q0DUC7_ORYSJ	LOC_Os03g09810.1
LOC_Os03g09900	Q8H7W7	Q8H7W7_ORYSJ	LOC_Os03g09900.1
LOC_Os03g09910	Q6VMN7	ALD1_ORYSJ	LOC_Os03g09910.1
LOC_Os03g09950	Q10QI1	Q10QI1_ORYSJ	LOC_Os03g09950.1
LOC_Os03g09970	Q8H7X3	Q8H7X3_ORYSJ	LOC_Os03g09970.1
LOC_Os03g09980	Q8H7X4	Q8H7X4_ORYSJ	LOC_Os03g09980.1
LOC_Os03g09990	Q8H7X5	Q8H7X5_ORYSJ	LOC_Os03g09990.1
LOC_Os03g10000	Q8H7X6	Q8H7X6_ORYSJ	LOC_Os03g10000.1
LOC_Os03g10010	Q10QH5	Q10QH5_ORYSJ	LOC_Os03g10010.1
LOC_Os03g10030	Q0DUB1	Q0DUB1_ORYSJ	LOC_Os03g10030.1
LOC_Os03g10040	Q10QH2	Q10QH2_ORYSJ	LOC_Os03g10040.1
LOC_Os03g10150	Q10QG0	Q10QG0_ORYSJ	LOC_Os03g10150.1
LOC_Os03g10200	Q10QF3	Q10QF3_ORYSJ	LOC_Os03g10200.1
LOC_Os03g10220	Q10QF1	Q10QF1_ORYSJ	LOC_Os03g10220.1
LOC_Os03g10270	Q10QE6	Q10QE6_ORYSJ	LOC_Os03g10270.1
LOC_Os03g10280	Q6Z698	Q6Z698_ORYSJ	LOC_Os03g10280.1
LOC_Os03g10310	Q10QE2	Q10QE2_ORYSJ	LOC_Os03g10310.1
LOC_Os03g10350	Q0DU84	Q0DU84_ORYSJ	LOC_Os03g10350.1
LOC_Os03g10360	Q10QD6	Q10QD6_ORYSJ	LOC_Os03g10360.1
LOC_Os03g10370	Q10QD5	Q10QD5_ORYSJ	LOC_Os03g10370.1
LOC_Os03g10380	Q10QD4	Q10QD4_ORYSJ	LOC_Os03g10380.1
LOC_Os03g10400	Q10QD1	Q10QD1_ORYSJ	LOC_Os03g10400.1
LOC_Os03g10440	C7J0F1	C7J0F1_ORYSJ	LOC_Os03g10440.1
LOC_Os03g10450	Q0DU76	Q0DU76_ORYSJ	LOC_Os03g10450.1
LOC_Os03g10460	Q10QC4	Q10QC4_ORYSJ	LOC_Os03g10460.1
LOC_Os03g10469	Q10QC2	Q10QC2_ORYSJ	LOC_Os03g10469.1
LOC_Os03g10478	C7J0F2	C7J0F2_ORYSJ	LOC_Os03g10478.1
LOC_Os03g10500	C7J0F3	C7J0F3_ORYSJ	LOC_Os03g10500.1
LOC_Os03g10520	Q10QB5	Q10QB5_ORYSJ	LOC_Os03g10520.1
LOC_Os03g11010	Q10Q65	NRAM2_ORYSJ	LOC_Os03g11010.1
LOC_Os03g11280	Q10Q35	Q10Q35_ORYSJ	LOC_Os03g11280.1
LOC_Os03g11310	Q0DU25	Q0DU25_ORYSJ	LOC_Os03g11310.1
LOC_Os03g11350	C7J0F8	C7J0F8_ORYSJ	LOC_Os03g11350.1
LOC_Os03g11380	Q0DU19	Q0DU19_ORYSJ	LOC_Os03g11380.1
LOC_Os03g11420	Q8L7J2	BGL06_ORYSJ	LOC_Os03g11420.1
LOC_Os03g11430	Q10Q19	Q10Q19_ORYSJ	LOC_Os03g11430.1
LOC_Os03g11450	Q10Q17	Q10Q17_ORYSJ	LOC_Os03g11450.1
LOC_Os03g11460	Q10Q16	Q10Q16_ORYSJ	LOC_Os03g11460.1
LOC_Os03g11480	Q10Q14	Q10Q14_ORYSJ	LOC_Os03g11480.1
LOC_Os03g11570	Q10Q05	Q10Q05_ORYSJ	LOC_Os03g11570.1
LOC_Os03g11590	A3A395	A3A395_ORYSJ	LOC_Os03g11590.1
LOC_Os03g11680	Q10PZ3	Q10PZ3_ORYSJ	LOC_Os03g11680.1
LOC_Os03g11700	Q10PZ0	Q10PZ0_ORYSJ	LOC_Os03g11700.1
LOC_Os03g11790	C7IZU5	C7IZU5_ORYSJ	LOC_Os03g11790.1
LOC_Os03g11830	Q10PX5	Q10PX5_ORYSJ	LOC_Os03g11830.1
LOC_Os03g11860	Q10PX2	Q10PX2_ORYSJ	LOC_Os03g11860.1
LOC_Os03g12350	Q8H7S7	ORR21_ORYSJ	LOC_Os03g12350.1
LOC_Os03g12440	Q8H7R9	Q8H7R9_ORYSJ	LOC_Os03g12440.1
LOC_Os03g12460	Q0DTU0	Q0DTU0_ORYSJ	LOC_Os03g12460.1
LOC_Os03g12470	Q8H7R6	Q8H7R6_ORYSJ	LOC_Os03g12470.1
LOC_Os03g12480	Q8H7R5	Q8H7R5_ORYSJ	LOC_Os03g12480.1
LOC_Os03g12490	Q0DHE6	Q0DHE6_ORYSJ	LOC_Os03g12490.1
LOC_Os03g12500	Q10PQ1	Q10PQ1_ORYSJ	LOC_Os03g12500.1
LOC_Os03g12520	Q8H7R2	Q8H7R2_ORYSJ	LOC_Os03g12520.1
LOC_Os03g12530	Q10PP8	MTP4_ORYSJ	LOC_Os03g12530.1
LOC_Os03g12630	Q10PN6	Q10PN6_ORYSJ	LOC_Os03g12630.1
LOC_Os03g12680	Q0DTS5	Q0DTS5_ORYSJ	LOC_Os03g12680.1
LOC_Os03g15050	Q10NX1	Q10NX1_ORYSJ	LOC_Os03g15050.1
LOC_Os03g15060	Q10NW8	Q10NW8_ORYSJ	LOC_Os03g15060.1
LOC_Os03g15070	Q10NW7	Q10NW7_ORYSJ	LOC_Os03g15070.1
LOC_Os03g15130	Q10NV9	Q10NV9_ORYSJ	LOC_Os03g15130.1
LOC_Os03g16180	Q84JF1	Q84JF1_ORYSJ	LOC_Os03g16180.1
LOC_Os03g16190	Q84J42	Q84J42_ORYSJ	LOC_Os03g16190.1
LOC_Os03g16300	Q84Q64	Q84Q64_ORYSJ	LOC_Os03g16300.1
LOC_Os03g16640	Q10ND4	Q10ND4_ORYSJ	LOC_Os03g16640.1
LOC_Os03g16840	Q10NB1	Q10NB1_ORYSJ	LOC_Os03g16840.1
LOC_Os03g18260	Q5QLE0	Q5QLE0_ORYSJ	LOC_Os03g18260.1
LOC_Os03g18630	Q0DSN4	Q0DSN4_ORYSJ	LOC_Os03g18630.1
LOC_Os03g18640	Q0DSN3	Q0DSN3_ORYSJ	LOC_Os03g18640.1
LOC_Os03g18660	Q10MR7	Q10MR7_ORYSJ	LOC_Os03g18660.1
LOC_Os03g18670	Q10MR6	Q10MR6_ORYSJ	LOC_Os03g18670.1
LOC_Os03g18680	Q10MR5	CSPLN_ORYSJ	LOC_Os03g18680.1
LOC_Os03g18690	Q8W422	Q8W422_ORYSJ	LOC_Os03g18690.1
LOC_Os03g18700	Q10MR3	Q10MR3_ORYSJ	LOC_Os03g18700.1
LOC_Os03g18710	Q10MR2	Q10MR2_ORYSJ	LOC_Os03g18710.1
LOC_Os03g18720	Q10MR0	RU2B_ORYSJ	LOC_Os03g18720.1
LOC_Os03g18729	Q10MQ9	Q10MQ9_ORYSJ	LOC_Os03g18729.1
LOC_Os03g19120	Q10MM2	Q10MM2_ORYSJ	LOC_Os03g19120.1
LOC_Os03g19190	Q10ML5	Q10ML5_ORYSJ	LOC_Os03g19190.1
LOC_Os03g19220	Q10ML2	Q10ML2_ORYSJ	LOC_Os03g19220.1
LOC_Os03g19230	Q10ML1	Q10ML1_ORYSJ	LOC_Os03g19230.1
LOC_Os03g19240	Q0DSJ5	Q0DSJ5_ORYSJ	LOC_Os03g19240.1
LOC_Os03g19250	Q10MK9	Q10MK9_ORYSJ	LOC_Os03g19250.1
LOC_Os03g19260	Q10MK8	Q10MK8_ORYSJ	LOC_Os03g19260.1
LOC_Os03g19270	Q10MK6	Q10MK6_ORYSJ	LOC_Os03g19270.1
LOC_Os03g19280	Q10MK5	Q10MK5_ORYSJ	LOC_Os03g19280.1
LOC_Os03g19300	Q10MK3	Q10MK3_ORYSJ	LOC_Os03g19300.1
LOC_Os03g19320	Q10MK1	Q10MK1_ORYSJ	LOC_Os03g19320.1
LOC_Os03g19330	C7J0P3	GT5_ORYSJ	LOC_Os03g19330.1
LOC_Os03g19340	C7J0P4	C7J0P4_ORYSJ	LOC_Os03g19340.1
LOC_Os03g19350	Q10MJ8	Q10MJ8_ORYSJ	LOC_Os03g19350.1
LOC_Os03g19370	Q10MJ6	Q10MJ6_ORYSJ	LOC_Os03g19370.1
LOC_Os03g19375	NA	NA	LOC_Os03g19375.1
LOC_Os03g19380	Q10MJ5	Q10MJ5_ORYSJ	LOC_Os03g19380.1
LOC_Os03g19390	Q10MJ4	Q10MJ4_ORYSJ	LOC_Os03g19390.1
LOC_Os03g19400	Q10MJ2	Q10MJ2_ORYSJ	LOC_Os03g19400.1
LOC_Os03g19452	Q10MI7	Q10MI7_ORYSJ	LOC_Os03g19452.1
LOC_Os03g19600	Q10MG8	Q10MG8_ORYSJ	LOC_Os03g19600.1
LOC_Os03g19830	Q10ME1	Q10ME1_ORYSJ	LOC_Os03g19830.1
LOC_Os03g19860	Q10MD8	Q10MD8_ORYSJ	LOC_Os03g19860.1
LOC_Os03g19880	Q10MD6	Q10MD6_ORYSJ	LOC_Os03g19880.1
LOC_Os03g20040	Q10MB9	Q10MB9_ORYSJ	LOC_Os03g20040.1
LOC_Os03g20050	Q10MB8	Q10MB8_ORYSJ	LOC_Os03g20050.1
LOC_Os03g20150	Q10MA8	Q10MA8_ORYSJ	LOC_Os03g20150.1
LOC_Os03g20190	C7J0P7	C7J0P7_ORYSJ	LOC_Os03g20190.1
LOC_Os03g20210	Q10MA3	Q10MA3_ORYSJ	LOC_Os03g20210.1
LOC_Os03g20590	Q10M61	Q10M61_ORYSJ	LOC_Os03g20590.1
LOC_Os03g21050	Q8H7M2	Q8H7M2_ORYSJ	LOC_Os03g21050.1
LOC_Os03g21060	Q0DS77	Q0DS77_ORYSJ	LOC_Os03g21060.1
LOC_Os03g21070	Q10M08	Q10M08_ORYSJ	LOC_Os03g21070.1
LOC_Os03g21080	Q0DS76	Q0DS76_ORYSJ	LOC_Os03g21080.1
LOC_Os03g21090	Q8H7L9	Q8H7L9_ORYSJ	LOC_Os03g21090.1
LOC_Os03g21100	Q0DS74	Q0DS74_ORYSJ	LOC_Os03g21100.1
LOC_Os03g21120	Q8H7L6	APY1_ORYSJ	LOC_Os03g21120.1
LOC_Os03g21130	Q8H7L5	Q8H7L5_ORYSJ	LOC_Os03g21130.1
LOC_Os03g21140	Q10M00	C3H22_ORYSJ	LOC_Os03g21140.1
LOC_Os03g21190	Q5VMT7	Q5VMT7_ORYSJ	LOC_Os03g21190.1
LOC_Os03g21780	Q10LT2	Q10LT2_ORYSJ	LOC_Os03g21780.1
LOC_Os03g21830	Q10LS7	Q10LS7_ORYSJ	LOC_Os03g21830.1
LOC_Os03g22830	Q10LG3	Q10LG3_ORYSJ	LOC_Os03g22830.1
LOC_Os03g22840	Q10LG2	Q10LG2_ORYSJ	LOC_Os03g22840.1
LOC_Os03g22850	Q10LG1	Q10LG1_ORYSJ	LOC_Os03g22850.1
LOC_Os03g22860	Q10LG0	Q10LG0_ORYSJ	LOC_Os03g22860.1
LOC_Os03g22870	Q0DRV3	Q0DRV3_ORYSJ	LOC_Os03g22870.1
LOC_Os03g22880	Q10LF8	Q10LF8_ORYSJ	LOC_Os03g22880.1
LOC_Os03g22890	Q10LF7	NUG2_ORYSJ	LOC_Os03g22890.1
LOC_Os03g22900	Q0DRV0	Q0DRV0_ORYSJ	LOC_Os03g22900.1
LOC_Os03g22930	Q10LF3	Q10LF3_ORYSJ	LOC_Os03g22930.1
LOC_Os03g22940	Q10LF2	Q10LF2_ORYSJ	LOC_Os03g22940.1
LOC_Os03g22960	Q10LF0	Q10LF0_ORYSJ	LOC_Os03g22960.1
LOC_Os03g22990	Q0DRU8	Q0DRU8_ORYSJ	LOC_Os03g22990.1
LOC_Os03g23010	Q0DRU7	Q0DRU7_ORYSJ	LOC_Os03g23010.1
LOC_Os03g23020	Q10LE2	Q10LE2_ORYSJ	LOC_Os03g23020.1
LOC_Os03g23030	C7J0Q1	C7J0Q1_ORYSJ	LOC_Os03g23030.1
LOC_Os03g23040	Q10LE0	Q10LE0_ORYSJ	LOC_Os03g23040.1
LOC_Os03g23050	Q10LD9	Q10LD9_ORYSJ	LOC_Os03g23050.1
LOC_Os03g23060	Q65X42	Q65X42_ORYSJ	LOC_Os03g23060.1
LOC_Os03g23080	Q10LD6	Q10LD6_ORYSJ	LOC_Os03g23080.1
LOC_Os03g23090	Q10LD5	Q10LD5_ORYSJ	LOC_Os03g23090.1
LOC_Os03g23200	Q10LC5	Q10LC5_ORYSJ	LOC_Os03g23200.1
LOC_Os03g23250	Q10LC1	Q10LC1_ORYSJ	LOC_Os03g23250.1
LOC_Os03g23860	Q10LB0	Q10LB0_ORYSJ	LOC_Os03g23860.1
LOC_Os03g23880	Q10LA8	Q10LA8_ORYSJ	LOC_Os03g23880.1
LOC_Os03g23890	Q10LA7	Q10LA7_ORYSJ	LOC_Os03g23890.1
LOC_Os03g23940	Q0DRU0	Q0DRU0_ORYSJ	LOC_Os03g23940.1
LOC_Os03g23960	Q10L99	Q10L99_ORYSJ	LOC_Os03g23960.1
LOC_Os03g23970	Q10L98	Q10L98_ORYSJ	LOC_Os03g23970.1
LOC_Os03g23980	Q10L97	Q10L97_ORYSJ	LOC_Os03g23980.1
LOC_Os03g23990	Q10L96	Q10L96_ORYSJ	LOC_Os03g23990.1
LOC_Os03g24000	Q10L95	Q10L95_ORYSJ	LOC_Os03g24000.1
LOC_Os03g24010	Q10L94	Q10L94_ORYSJ	LOC_Os03g24010.1
LOC_Os03g24020	Q10L93	Q10L93_ORYSJ	LOC_Os03g24020.1
LOC_Os03g24030	Q10L92	Q10L92_ORYSJ	LOC_Os03g24030.1
LOC_Os03g24040	Q10L91	Q10L91_ORYSJ	LOC_Os03g24040.1
LOC_Os03g24050	Q10L90	Q10L90_ORYSJ	LOC_Os03g24050.1
LOC_Os03g24060	Q10L89	Q10L89_ORYSJ	LOC_Os03g24060.1
LOC_Os03g24070	C7J0B4	C7J0B4_ORYSJ	LOC_Os03g24070.1
LOC_Os03g24080	Q10L87	Q10L87_ORYSJ	LOC_Os03g24080.1
LOC_Os03g24090	Q10L86	Q10L86_ORYSJ	LOC_Os03g24090.1
LOC_Os03g24100	Q10L85	Q10L85_ORYSJ	LOC_Os03g24100.1
LOC_Os03g24130	Q10L82	Q10L82_ORYSJ	LOC_Os03g24130.1
LOC_Os03g24140	Q10L81	Q10L81_ORYSJ	LOC_Os03g24140.1
LOC_Os03g24160	Q10L79	Q10L79_ORYSJ	LOC_Os03g24160.1
LOC_Os03g24170	C7J0B6	C7J0B6_ORYSJ	LOC_Os03g24170.1
LOC_Os03g24180	C7J0B7	C7J0B7_ORYSJ	LOC_Os03g24180.1
LOC_Os03g24184	Q10L76	Q10L76_ORYSJ	LOC_Os03g24184.1
LOC_Os03g24190	Q7XM08	Q7XM08_ORYSJ	LOC_Os03g24190.1
LOC_Os03g24200	Q10L74	Q10L74_ORYSJ	LOC_Os03g24200.1
LOC_Os03g24210	Q10L73	Q10L73_ORYSJ	LOC_Os03g24210.1
LOC_Os03g24220	Q10L72	Q10L72_ORYSJ	LOC_Os03g24220.1
LOC_Os03g24240	Q33CD9	Q33CD9_ORYSJ	LOC_Os03g24240.1
LOC_Os03g24260	Q10L66	Q10L66_ORYSJ	LOC_Os03g24260.1
LOC_Os03g24300	Q10L62	Q10L62_ORYSJ	LOC_Os03g24300.1
LOC_Os03g24620	Q10L29	Q10L29_ORYSJ	LOC_Os03g24620.1
LOC_Os03g24630	Q10L28	Q10L28_ORYSJ	LOC_Os03g24630.1
LOC_Os03g24690	C7J0Q6	C7J0Q6_ORYSJ	LOC_Os03g24690.1
LOC_Os03g24710	Q10L22	Q10L22_ORYSJ	LOC_Os03g24710.1
LOC_Os03g24750	Q10L18	Q10L18_ORYSJ	LOC_Os03g24750.1
LOC_Os03g24800	Q10L13	Q10L13_ORYSJ	LOC_Os03g24800.1
LOC_Os03g24810	Q10L12	Q10L12_ORYSJ	LOC_Os03g24810.1
LOC_Os03g24950	Q10KZ5	Q10KZ5_ORYSJ	LOC_Os03g24950.1
LOC_Os03g25070	Q10KY3	CAMK1_ORYSJ	LOC_Os03g25070.1
LOC_Os03g25100	Q5ZDK9	Q5ZDK9_ORYSJ	LOC_Os03g25100.1
LOC_Os03g25110	Q0DRP4	Q0DRP4_ORYSJ	LOC_Os03g25110.1
LOC_Os03g25120	Q10KX8	HFB4D_ORYSJ	LOC_Os03g25120.1
LOC_Os03g25130	Q10KX7	Q10KX7_ORYSJ	LOC_Os03g25130.1
LOC_Os03g25140	Q10KX6	Q10KX6_ORYSJ	LOC_Os03g25140.1
LOC_Os03g25150	Q10KX5	Q10KX5_ORYSJ	LOC_Os03g25150.1
LOC_Os03g25170	Q10KX3	Q10KX3_ORYSJ	LOC_Os03g25170.1
LOC_Os03g25190	Q10KX1	Q10KX1_ORYSJ	LOC_Os03g25190.1
LOC_Os03g25200	Q10KX0	Q10KX0_ORYSJ	LOC_Os03g25200.1
LOC_Os03g25220	Q9FRE9	Q9FRE9_ORYSJ	LOC_Os03g25220.1
LOC_Os03g25240	Q10KW7	Q10KW7_ORYSJ	LOC_Os03g25240.1
LOC_Os03g25250	Q10KW6	Q10KW6_ORYSJ	LOC_Os03g25250.1
LOC_Os03g25260	Q0DRP0	Q0DRP0_ORYSJ	LOC_Os03g25260.1
LOC_Os03g25270	Q10KW4	Q10KW4_ORYSJ	LOC_Os03g25270.1
LOC_Os03g25280	Q0DRN8	Q0DRN8_ORYSJ	LOC_Os03g25280.1
LOC_Os03g25289	Q10KW2	Q10KW2_ORYSJ	LOC_Os03g25289.1
LOC_Os03g25300	Q10KW1	Q10KW1_ORYSJ	LOC_Os03g25300.1
LOC_Os03g25304	Q10KW0	Q10KW0_ORYSJ	LOC_Os03g25304.1
LOC_Os03g25310	Q9FRE0	Q9FRE0_ORYSJ	LOC_Os03g25310.1
LOC_Os03g25314	Q10KV8	Q10KV8_ORYSJ	LOC_Os03g25314.1
LOC_Os03g25320	Q0DRN6	Q0DRN6_ORYSJ	LOC_Os03g25320.1
LOC_Os03g25350	Q10KV4	Q10KV4_ORYSJ	LOC_Os03g25350.1
LOC_Os03g25570	Q84TT0	Q84TT0_ORYSJ	LOC_Os03g25570.1
LOC_Os03g25590	Q84TT6	Q84TT6_ORYSJ	LOC_Os03g25590.1
LOC_Os03g25600	Q84TS1	Q84TS1_ORYSJ	LOC_Os03g25600.1
LOC_Os03g25620	Q7Y160	Q7Y160_ORYSJ	LOC_Os03g25620.1
LOC_Os03g26704	Q10KH4	Q10KH4_ORYSJ	LOC_Os03g26704.1
LOC_Os03g28190	Q94LE8	Q94LE8_ORYSJ	LOC_Os03g28190.1
LOC_Os03g28260	Q0DRA9	Q0DRA9_ORYSJ	LOC_Os03g28260.1
LOC_Os03g29790	Q10JR0	Q10JR0_ORYSJ	LOC_Os03g29790.1
LOC_Os03g30170	Q75IX0	Q75IX0_ORYSJ	LOC_Os03g30170.1
LOC_Os03g30880	Q84MF3	Q84MF3_ORYSJ	LOC_Os03g30880.1
LOC_Os03g30980	Q84MF9	Q84MF9_ORYSJ	LOC_Os03g30980.1
LOC_Os03g36660	Q94I61	Q94I61_ORYSJ	LOC_Os03g36660.1
LOC_Os03g37750	Q84MS5	Q84MS5_ORYSJ	LOC_Os03g37750.1
LOC_Os03g38390	Q84NW9	Q84NW9_ORYSJ	LOC_Os03g38390.1
LOC_Os03g38570	Q75IC9	Q75IC9_ORYSJ	LOC_Os03g38570.1
LOC_Os03g38580	Q0DQL5	Q0DQL5_ORYSJ	LOC_Os03g38580.1
LOC_Os03g39210	Q7EY51	Q7EY51_ORYSJ	LOC_Os03g39210.1
LOC_Os03g39220	Q5W6J9	Q5W6J9_ORYSJ	LOC_Os03g39220.1
LOC_Os03g39284	Q75H36	Q75H36_ORYSJ	LOC_Os03g39284.1
LOC_Os03g41990	Q6ATV0	Q6ATV0_ORYSJ	LOC_Os03g41990.1
LOC_Os03g42070	Q0DQA9	CCD51_ORYSJ	LOC_Os03g42070.1
LOC_Os03g42790	Q75LV3	Q75LV3_ORYSJ	LOC_Os03g42790.1
LOC_Os03g42799	NA	NA	LOC_Os03g42799.1
LOC_Os03g42810	Q75LV1	Q75LV1_ORYSJ	LOC_Os03g42810.1
LOC_Os03g42820	Q8W5D0	Q8W5D0_ORYSJ	LOC_Os03g42820.1
LOC_Os03g42830	Q75LU9	Q75LU9_ORYSJ	LOC_Os03g42830.1
LOC_Os03g43250	Q60DB4	Q60DB4_ORYSJ	LOC_Os03g43250.1
LOC_Os03g43280	Q10GE2	Q10GE2_ORYSJ	LOC_Os03g43280.1
LOC_Os03g43790	Q6AUE6	Q6AUE6_ORYSJ	LOC_Os03g43790.1
LOC_Os03g43800	Q0DQ40	Q0DQ40_ORYSJ	LOC_Os03g43800.1
LOC_Os03g43810	Q6AUE8	Q6AUE8_ORYSJ	LOC_Os03g43810.1
LOC_Os03g44360	Q10G32	Q10G32_ORYSJ	LOC_Os03g44360.1
LOC_Os03g44390	Q10G29	Q10G29_ORYSJ	LOC_Os03g44390.1
LOC_Os03g44460	Q10G22	Q10G22_ORYSJ	LOC_Os03g44460.1
LOC_Os03g47210	Q9FRG1	Q9FRG1_ORYSJ	LOC_Os03g47210.1
LOC_Os03g47290	Q9FRF3	Q9FRF3_ORYSJ	LOC_Os03g47290.1
LOC_Os03g47430	Q10F82	Q10F82_ORYSJ	LOC_Os03g47430.1
LOC_Os03g47480	Q84SX5	Q84SX5_ORYSJ	LOC_Os03g47480.1
LOC_Os03g47490	Q84SX2	Q84SX2_ORYSJ	LOC_Os03g47490.1
LOC_Os03g47500	Q84SW9	Q84SW9_ORYSJ	LOC_Os03g47500.1
LOC_Os03g47510	Q10F75	Q10F75_ORYSJ	LOC_Os03g47510.1
LOC_Os03g47530	Q84SY6	Q84SY6_ORYSJ	LOC_Os03g47530.1
LOC_Os03g47540	Q84SY3	Q84SY3_ORYSJ	LOC_Os03g47540.1
LOC_Os03g47550	Q84SX9	Q84SX9_ORYSJ	LOC_Os03g47550.1
LOC_Os03g47560	Q0DPM9	Q0DPM9_ORYSJ	LOC_Os03g47560.1
LOC_Os03g47564	Q84SX3	Q84SX3_ORYSJ	LOC_Os03g47564.1
LOC_Os03g47570	Q84SX0	Q84SX0_ORYSJ	LOC_Os03g47570.1
LOC_Os03g47574	Q84SW7	Q84SW7_ORYSJ	LOC_Os03g47574.1
LOC_Os03g47580	Q9AUL4	Q9AUL4_ORYSJ	LOC_Os03g47580.1
LOC_Os03g47584	Q6AU61	Q6AU61_ORYSJ	LOC_Os03g47584.1
LOC_Os03g47590	Q9AUL5	Q9AUL5_ORYSJ	LOC_Os03g47590.1
LOC_Os03g47600	Q9AUL6	Q9AUL6_ORYSJ	LOC_Os03g47600.1
LOC_Os03g47610	Q9AUL7	Q9AUL7_ORYSJ	LOC_Os03g47610.1
LOC_Os03g47614	Q10F61	Q10F61_ORYSJ	LOC_Os03g47614.1
LOC_Os03g47620	Q0DPM4	Q0DPM4_ORYSJ	LOC_Os03g47620.1
LOC_Os03g47629	Q10F59	Q10F59_ORYSJ	LOC_Os03g47629.1
LOC_Os03g47640	Q9AUM0	Q9AUM0_ORYSJ	LOC_Os03g47640.1
LOC_Os03g47650	Q9AYD0	Q9AYD0_ORYSJ	LOC_Os03g47650.1
LOC_Os03g47670	Q9AYD2	Q9AYD2_ORYSJ	LOC_Os03g47670.1
LOC_Os03g47686	Q9AYD4	Q9AYD4_ORYSJ	LOC_Os03g47686.1
LOC_Os03g47693	Q9AYD5	Q9AYD5_ORYSJ	LOC_Os03g47693.1
LOC_Os03g47720	Q9AUM5	Q9AUM5_ORYSJ	LOC_Os03g47720.1
LOC_Os03g47730	Q9AYD8	Q9AYD8_ORYSJ	LOC_Os03g47730.1
LOC_Os03g47740	Q10F49	Q10F49_ORYSJ	LOC_Os03g47740.1
LOC_Os03g48580	Q6AV47	Q6AV47_ORYSJ	LOC_Os03g48580.1
LOC_Os03g48590	Q6AV46	Q6AV46_ORYSJ	LOC_Os03g48590.1
LOC_Os03g49000	Q851D2	Q851D2_ORYSJ	LOC_Os03g49000.1
LOC_Os03g49090	Q851C3	Q851C3_ORYSJ	LOC_Os03g49090.1
LOC_Os03g51780	Q10DK0	Q10DK0_ORYSJ	LOC_Os03g51780.1
LOC_Os03g51790	Q0DNY0	Q0DNY0_ORYSJ	LOC_Os03g51790.1
LOC_Os03g53800	Q10CU9	Q10CU9_ORYSJ	LOC_Os03g53800.1
LOC_Os03g53810	Q8W2Z7	Q8W2Z7_ORYSJ	LOC_Os03g53810.1
LOC_Os03g53845	NA	NA	LOC_Os03g53845.1
LOC_Os03g55094	Q10CK3	Q10CK3_ORYSJ	LOC_Os03g55094.1
LOC_Os03g55350	Q94H95	Q94H95_ORYSJ	LOC_Os03g55350.1
LOC_Os03g56110	Q10ED2	KNOS8_ORYSJ	LOC_Os03g56110.1
LOC_Os03g56300	Q7XZW1	Q7XZW1_ORYSJ	LOC_Os03g56300.1
LOC_Os03g56750	Q9AY80	Q9AY80_ORYSJ	LOC_Os03g56750.1
LOC_Os03g57020	Q10CG8	Q10CG8_ORYSJ	LOC_Os03g57020.1
LOC_Os03g57260	Q10CE1	Q10CE1_ORYSJ	LOC_Os03g57260.1
LOC_Os03g57470	Q6F3A4	Q6F3A4_ORYSJ	LOC_Os03g57470.1
LOC_Os03g57520	Q852N5	Q852N5_ORYSJ	LOC_Os03g57520.1
LOC_Os03g57540	Q852N4	Q852N4_ORYSJ	LOC_Os03g57540.1
LOC_Os03g57580	Q10CA1	Q10CA1_ORYSJ	LOC_Os03g57580.1
LOC_Os03g57600	Q852N0	Q852N0_ORYSJ	LOC_Os03g57600.1
LOC_Os03g57720	Q10C89	Q10C89_ORYSJ	LOC_Os03g57720.1
LOC_Os03g57780	Q10C82	Q10C82_ORYSJ	LOC_Os03g57780.1
LOC_Os03g57808	Q10C77	Q10C77_ORYSJ	LOC_Os03g57808.1
LOC_Os03g57890	F4MG34	F4MG34_ORYSJ	LOC_Os03g57890.1
LOC_Os03g57910	Q852K7	Q852K7_ORYSJ	LOC_Os03g57910.1
LOC_Os03g57940	Q10C64	Q10C64_ORYSJ	LOC_Os03g57940.1
LOC_Os03g58050	Q8H590	Q8H590_ORYSJ	LOC_Os03g58050.1
LOC_Os03g58670	Q0DMN3	Q0DMN3_ORYSJ	LOC_Os03g58670.1
LOC_Os03g59500	Q6ATQ5	Q6ATQ5_ORYSJ	LOC_Os03g59500.1
LOC_Os03g59850	Q75HG9	Q75HG9_ORYSJ	LOC_Os03g59850.1
LOC_Os03g60050	Q10BK0	Q10BK0_ORYSJ	LOC_Os03g60050.1
LOC_Os03g60350	Q84TW8	Q84TW8_ORYSJ	LOC_Os03g60350.1
LOC_Os03g60419	NA	NA	LOC_Os03g60419.1
LOC_Os03g60890	Q852B6	Q852B6_ORYSJ	LOC_Os03g60890.1
LOC_Os03g60992	Q94GD9	Q94GD9_ORYSJ	LOC_Os03g60992.1
LOC_Os03g61070	Q10BA2	Q10BA2_ORYSJ	LOC_Os03g61070.1
LOC_Os03g61130	Q0DM59	Q0DM59_ORYSJ	LOC_Os03g61130.1
LOC_Os03g61380	Q850X6	Q850X6_ORYSJ	LOC_Os03g61380.1
LOC_Os03g61410	Q850Y0	Q850Y0_ORYSJ	LOC_Os03g61410.1
LOC_Os03g62480	Q0DLX2	Q0DLX2_ORYSJ	LOC_Os03g62480.1
LOC_Os03g62730	Q75LC7	Q75LC7_ORYSJ	LOC_Os03g62730.1
LOC_Os03g62740	Q75LC6	Q75LC6_ORYSJ	LOC_Os03g62740.1
LOC_Os03g62760	Q75LC3	Q75LC3_ORYSJ	LOC_Os03g62760.1
LOC_Os03g62770	Q75LC2	Q75LC2_ORYSJ	LOC_Os03g62770.1
LOC_Os03g62780	Q75LC1	Q75LC1_ORYSJ	LOC_Os03g62780.1
LOC_Os03g62790	Q10AP7	Q10AP7_ORYSJ	LOC_Os03g62790.1
LOC_Os03g62800	Q75LB8	Q75LB8_ORYSJ	LOC_Os03g62800.1
LOC_Os03g62810	Q75LB7	Q75LB7_ORYSJ	LOC_Os03g62810.1
LOC_Os03g62820	Q75LB6	Q75LB6_ORYSJ	LOC_Os03g62820.1
LOC_Os03g62830	C7IZL1	C7IZL1_ORYSJ	LOC_Os03g62830.1
LOC_Os03g62850	Q84SP0	Q84SP0_ORYSJ	LOC_Os03g62850.1
LOC_Os03g62860	Q84SP3	Q84SP3_ORYSJ	LOC_Os03g62860.1
LOC_Os03g62870	Q84SP5	Q84SP5_ORYSJ	LOC_Os03g62870.1
LOC_Os03g62880	Q84SQ0	Q84SQ0_ORYSJ	LOC_Os03g62880.1
LOC_Os03g62900	Q84SQ1	Q84SQ1_ORYSJ	LOC_Os03g62900.1
LOC_Os03g62910	Q84SM9	Q84SM9_ORYSJ	LOC_Os03g62910.1
LOC_Os03g62920	Q84SN2	Q84SN2_ORYSJ	LOC_Os03g62920.1
LOC_Os03g62950	Q10AN1	Q10AN1_ORYSJ	LOC_Os03g62950.1
LOC_Os03g62974	Q84SP4	Q84SP4_ORYSJ	LOC_Os03g62974.1
LOC_Os03g63000	Q84SP8	Q84SP8_ORYSJ	LOC_Os03g63000.1
LOC_Os03g63010	Q10AM8	Q10AM8_ORYSJ	LOC_Os03g63010.1
LOC_Os03g63030	Q84SN6	Q84SN6_ORYSJ	LOC_Os03g63030.1
LOC_Os03g63040	Q84SN9	Q84SN9_ORYSJ	LOC_Os03g63040.1
LOC_Os03g63060	Q84JT2	Q84JT2_ORYSJ	LOC_Os03g63060.1
LOC_Os03g63110	Q852C6	Q852C6_ORYSJ	LOC_Os03g63110.1
LOC_Os03g63140	Q852C9	Q852C9_ORYSJ	LOC_Os03g63140.1
LOC_Os03g63150	Q852D0	Q852D0_ORYSJ	LOC_Os03g63150.1
LOC_Os03g63240	Q852D9	Q852D9_ORYSJ	LOC_Os03g63240.1
LOC_Os03g63250	Q84LH7	Q84LH7_ORYSJ	LOC_Os03g63250.1
LOC_Os03g63260	Q0DLS5	Q0DLS5_ORYSJ	LOC_Os03g63260.1
LOC_Os03g63270	Q852E1	Q852E1_ORYSJ	LOC_Os03g63270.1
LOC_Os03g63280	Q852E2	Q852E2_ORYSJ	LOC_Os03g63280.1
LOC_Os03g63290	Q851Z7	Q851Z7_ORYSJ	LOC_Os03g63290.1
LOC_Os03g63300	Q84K83	Q84K83_ORYSJ	LOC_Os03g63300.1
LOC_Os03g63330	Q0DLR8	Q0DLR8_ORYSJ	LOC_Os03g63330.1
LOC_Os03g63370	Q851Z2	Q851Z2_ORYSJ	LOC_Os03g63370.1
LOC_Os03g63470	Q0DLQ8	Q0DLQ8_ORYSJ	LOC_Os03g63470.1
LOC_Os03g63670	Q84T85	Q84T85_ORYSJ	LOC_Os03g63670.1
LOC_Os04g01320	Q7XXJ5	Q7XXJ5_ORYSJ	LOC_Os04g01320.1
LOC_Os04g01380	Q7XXJ3	Q7XXJ3_ORYSJ	LOC_Os04g01380.1
LOC_Os04g01439	Q7XXJ0	Q7XXJ0_ORYSJ	LOC_Os04g01439.1
LOC_Os04g01460	NA	NA	LOC_Os04g01460.1
LOC_Os04g02210	Q8S6U9	Q8S6U9_ORYSJ	LOC_Os04g02210.1
LOC_Os04g02220	NA	NA	LOC_Os04g02220.1
LOC_Os04g02230	Q7X7B4	Q7X7B4_ORYSJ	LOC_Os04g02230.1
LOC_Os04g02390	Q7XXK9	Q7XXK9_ORYSJ	LOC_Os04g02390.1
LOC_Os04g02410	NA	NA	LOC_Os04g02410.1
LOC_Os04g02530	C7J0S4	C7J0S4_ORYSJ	LOC_Os04g02530.1
LOC_Os04g02690	Q7XT11	Q7XT11_ORYSJ	LOC_Os04g02690.1
LOC_Os04g02980	C7J1I9	C7J1I9_ORYSJ	LOC_Os04g02980.1
LOC_Os04g03050	Q0JFA2	Q0JFA2_ORYSJ	LOC_Os04g03050.1
LOC_Os04g03350	Q6MWB6	Q6MWB6_ORYSJ	LOC_Os04g03350.1
LOC_Os04g03910	Q7XP32	Q7XP32_ORYSJ	LOC_Os04g03910.1
LOC_Os04g03940	Q7XP29	Q7XP29_ORYSJ	LOC_Os04g03940.1
LOC_Os04g04860	Q7X6L3	Q7X6L3_ORYSJ	LOC_Os04g04860.1
LOC_Os04g04870	Q8S835	Q8S835_ORYSJ	LOC_Os04g04870.1
LOC_Os04g05050	Q0JF70	Q0JF70_ORYSJ	LOC_Os04g05050.1
LOC_Os04g05650	Q7XRV9	Q7XRV9_ORYSJ	LOC_Os04g05650.1
LOC_Os04g05710	Q7XRV6	Q7XRV6_ORYSJ	LOC_Os04g05710.1
LOC_Os04g05720	NA	NA	LOC_Os04g05720.1
LOC_Os04g05960	NA	NA	LOC_Os04g05960.1
LOC_Os04g06660	Q7XMN2	Q7XMN2_ORYSJ	LOC_Os04g06660.1
LOC_Os04g06900	Q7XMW7	Q7XMW7_ORYSJ	LOC_Os04g06900.1
LOC_Os04g07020	Q7XQL8	Q7XQL8_ORYSJ	LOC_Os04g07020.1
LOC_Os04g07040	Q7XQM0	Q7XQM0_ORYSJ	LOC_Os04g07040.1
LOC_Os04g07990	NA	NA	LOC_Os04g07990.1
LOC_Os04g08170	Q7XQW1	Q7XQW1_ORYSJ	LOC_Os04g08170.1
LOC_Os04g08800	Q0JF27	Q0JF27_ORYSJ	LOC_Os04g08800.1
LOC_Os04g11160	Q7XP09	Q7XP09_ORYSJ	LOC_Os04g11160.1
LOC_Os04g12000	Q7XPB1	Q7XPB1_ORYSJ	LOC_Os04g12000.1
LOC_Os04g12030	Q7XPA9	Q7XPA9_ORYSJ	LOC_Os04g12030.1
LOC_Os04g12110	Q5JQV5	Q5JQV5_ORYSJ	LOC_Os04g12110.1
LOC_Os04g12130	Q5JQU4	Q5JQU4_ORYSJ	LOC_Os04g12130.1
LOC_Os04g12170	Q5JQT9	Q5JQT9_ORYSJ	LOC_Os04g12170.1
LOC_Os04g12190	Q5JQV0	Q5JQV0_ORYSJ	LOC_Os04g12190.1
LOC_Os04g12230	Q5JQU5	Q5JQU5_ORYSJ	LOC_Os04g12230.1
LOC_Os04g12240	Q5JQV1	Q5JQV1_ORYSJ	LOC_Os04g12240.1
LOC_Os04g12290	Q7XR42	Q7XR42_ORYSJ	LOC_Os04g12290.1
LOC_Os04g12300	Q7XR41	Q7XR41_ORYSJ	LOC_Os04g12300.1
LOC_Os04g12310	Q7XR40	Q7XR40_ORYSJ	LOC_Os04g12310.1
LOC_Os04g12320	Q7XR39	Q7XR39_ORYSJ	LOC_Os04g12320.1
LOC_Os04g12340	Q7XR37	Q7XR37_ORYSJ	LOC_Os04g12340.1
LOC_Os04g12360	Q7XR35	Q7XR35_ORYSJ	LOC_Os04g12360.1
LOC_Os04g12370	Q7XR34	Q7XR34_ORYSJ	LOC_Os04g12370.1
LOC_Os04g12390	Q7XSN2	Q7XSN2_ORYSJ	LOC_Os04g12390.1
LOC_Os04g12410	Q7XR30	Q7XR30_ORYSJ	LOC_Os04g12410.1
LOC_Os04g12420	Q7XR29	Q7XR29_ORYSJ	LOC_Os04g12420.1
LOC_Os04g12440	Q7XR27	Q7XR27_ORYSJ	LOC_Os04g12440.1
LOC_Os04g12460	Q7X8N4	Q7X8N4_ORYSJ	LOC_Os04g12460.1
LOC_Os04g13790	Q7XP77	Q7XP77_ORYSJ	LOC_Os04g13790.1
LOC_Os04g14010	Q5JPW1	Q5JPW1_ORYSJ	LOC_Os04g14010.1
LOC_Os04g14060	Q7X8T3	Q7X8T3_ORYSJ	LOC_Os04g14060.1
LOC_Os04g14090	Q7XX40	Q7XX40_ORYSJ	LOC_Os04g14090.1
LOC_Os04g14180	Q7XX38	Q7XX38_ORYSJ	LOC_Os04g14180.1
LOC_Os04g14520	Q7XWN7	Q7XWN7_ORYSJ	LOC_Os04g14520.1
LOC_Os04g14580	Q7XQZ3	Q7XQZ3_ORYSJ	LOC_Os04g14580.1
LOC_Os04g14870	Q7F9H8	Q7F9H8_ORYSJ	LOC_Os04g14870.1
LOC_Os04g14900	NA	NA	LOC_Os04g14900.1
LOC_Os04g15580	Q0JEP1	Q0JEP1_ORYSJ	LOC_Os04g15580.1
LOC_Os04g16330	Q7FA41	Q7FA41_ORYSJ	LOC_Os04g16330.1
LOC_Os04g16660	NA	NA	LOC_Os04g16660.1
LOC_Os04g17550	NA	NA	LOC_Os04g17550.1
LOC_Os04g17660	Q0JEL3	Q0JEL3_ORYSJ	LOC_Os04g17660.1
LOC_Os04g18244	Q7XQ58	Q7XQ58_ORYSJ	LOC_Os04g18244.1
LOC_Os04g18350	NA	NA	LOC_Os04g18350.1
LOC_Os04g18730	Q5VMZ1	Q5VMZ1_ORYSJ	LOC_Os04g18730.1
LOC_Os04g18740	Q7XWM0	Q7XWM0_ORYSJ	LOC_Os04g18740.1
LOC_Os04g18850	Q7XRK3	Q7XRK3_ORYSJ	LOC_Os04g18850.1
LOC_Os04g18860	Q7XRK2	Q7XRK2_ORYSJ	LOC_Os04g18860.1
LOC_Os04g18930	Q7XRJ6	Q7XRJ6_ORYSJ	LOC_Os04g18930.1
LOC_Os04g18980	Q7XRJ2	Q7XRJ2_ORYSJ	LOC_Os04g18980.1
LOC_Os04g19000	Q7F9K2	Q7F9K2_ORYSJ	LOC_Os04g19000.1
LOC_Os04g19050	NA	NA	LOC_Os04g19050.1
LOC_Os04g19060	Q7X8W7	Q7X8W7_ORYSJ	LOC_Os04g19060.1
LOC_Os04g19370	Q7XWC6	Q7XWC6_ORYSJ	LOC_Os04g19370.1
LOC_Os04g19390	Q7XRF9	Q7XRF9_ORYSJ	LOC_Os04g19390.1
LOC_Os04g19400	Q7XWC7	Q7XWC7_ORYSJ	LOC_Os04g19400.1
LOC_Os04g19430	Q7XWD0	Q7XWD0_ORYSJ	LOC_Os04g19430.1
LOC_Os04g19880	Q7XLA9	Q7XLA9_ORYSJ	LOC_Os04g19880.1
LOC_Os04g19900	Q7XLA7	Q7XLA7_ORYSJ	LOC_Os04g19900.1
LOC_Os04g20164	Q7XWW0	Q7XWW0_ORYSJ	LOC_Os04g20164.1
LOC_Os04g20300	Q7XSZ3	Q7XSZ3_ORYSJ	LOC_Os04g20300.1
LOC_Os04g20320	Q7XSZ1	Q7XSZ1_ORYSJ	LOC_Os04g20320.1
LOC_Os04g20330	Q7XSZ0	Q7XSZ0_ORYSJ	LOC_Os04g20330.1
LOC_Os04g20340	Q7XSY9	Q7XSY9_ORYSJ	LOC_Os04g20340.1
LOC_Os04g20350	Q7XSY8	Q7XSY8_ORYSJ	LOC_Os04g20350.1
LOC_Os04g20360	Q7XSY7	Q7XSY7_ORYSJ	LOC_Os04g20360.1
LOC_Os04g20424	NA	NA	LOC_Os04g20424.1
LOC_Os04g20430	Q7XSY2	Q7XSY2_ORYSJ	LOC_Os04g20430.1
LOC_Os04g20450	NA	NA	LOC_Os04g20450.1
LOC_Os04g20460	NA	NA	LOC_Os04g20460.1
LOC_Os04g20474	Q7XSX9	Q7XSX9_ORYSJ	LOC_Os04g20474.1
LOC_Os04g20490	NA	NA	LOC_Os04g20490.1
LOC_Os04g20500	Q7XSX8	Q7XSX8_ORYSJ	LOC_Os04g20500.1
LOC_Os04g20520	NA	NA	LOC_Os04g20520.1
LOC_Os04g20610	Q7XRW1	Q7XRW1_ORYSJ	LOC_Os04g20610.1
LOC_Os04g20640	Q7XWW9	Q7XWW9_ORYSJ	LOC_Os04g20640.1
LOC_Os04g20670	Q7XWW7	Q7XWW7_ORYSJ	LOC_Os04g20670.1
LOC_Os04g20680	Q7XWW6	Q7XWW6_ORYSJ	LOC_Os04g20680.1
LOC_Os04g20860	NA	NA	LOC_Os04g20860.1
LOC_Os04g20900	NA	NA	LOC_Os04g20900.1
LOC_Os04g21100	Q7XX09	Q7XX09_ORYSJ	LOC_Os04g21100.1
LOC_Os04g21320	Q0JEF7	CSPLA_ORYSJ	LOC_Os04g21320.1
LOC_Os04g21330	Q7X8K8	Q7X8K8_ORYSJ	LOC_Os04g21330.1
LOC_Os04g21340	Q7XX26	Q7XX26_ORYSJ	LOC_Os04g21340.1
LOC_Os04g21350	Q0JEF5	FLP4_ORYSJ	LOC_Os04g21350.1
LOC_Os04g21360	Q7XX24	Q7XX24_ORYSJ	LOC_Os04g21360.1
LOC_Os04g21370	Q7XX23	Q7XX23_ORYSJ	LOC_Os04g21370.1
LOC_Os04g21380	Q7XX22	Q7XX22_ORYSJ	LOC_Os04g21380.1
LOC_Os04g21390	Q7XX21	Q7XX21_ORYSJ	LOC_Os04g21390.1
LOC_Os04g21400	Q7XX20	Q7XX20_ORYSJ	LOC_Os04g21400.1
LOC_Os04g21410	Q7XX19	Q7XX19_ORYSJ	LOC_Os04g21410.1
LOC_Os04g21430	NA	NA	LOC_Os04g21430.1
LOC_Os04g21450	Q7XX16	Q7XX16_ORYSJ	LOC_Os04g21450.1
LOC_Os04g21460	NA	NA	LOC_Os04g21460.1
LOC_Os04g21470	Q7FA02	Q7FA02_ORYSJ	LOC_Os04g21470.1
LOC_Os04g21480	Q7X6R8	Q7X6R8_ORYSJ	LOC_Os04g21480.1
LOC_Os04g21500	Q7X7N4	Q7X7N4_ORYSJ	LOC_Os04g21500.1
LOC_Os04g21510	Q7XW87	Q7XW87_ORYSJ	LOC_Os04g21510.1
LOC_Os04g21520	Q7XW86	Q7XW86_ORYSJ	LOC_Os04g21520.1
LOC_Os04g21530	Q7XW85	Q7XW85_ORYSJ	LOC_Os04g21530.1
LOC_Os04g21560	Q7XW84	Q7XW84_ORYSJ	LOC_Os04g21560.1
LOC_Os04g21570	Q7XW83	Q7XW83_ORYSJ	LOC_Os04g21570.1
LOC_Os04g21580	Q0JEF4	Q0JEF4_ORYSJ	LOC_Os04g21580.1
LOC_Os04g21590	Q7XW81	Q7XW81_ORYSJ	LOC_Os04g21590.1
LOC_Os04g21600	NA	NA	LOC_Os04g21600.1
LOC_Os04g21610	Q7XW79	Q7XW79_ORYSJ	LOC_Os04g21610.1
LOC_Os04g21620	Q7XW78	Q7XW78_ORYSJ	LOC_Os04g21620.1
LOC_Os04g21640	NA	NA	LOC_Os04g21640.1
LOC_Os04g21650	Q0JEF0	Q0JEF0_ORYSJ	LOC_Os04g21650.1
LOC_Os04g21660	Q7XW77	Q7XW77_ORYSJ	LOC_Os04g21660.1
LOC_Os04g21670	NA	NA	LOC_Os04g21670.1
LOC_Os04g21705	Q7XW73	Q7XW73_ORYSJ	LOC_Os04g21705.1
LOC_Os04g21710	Q0JEE8	Q0JEE8_ORYSJ	LOC_Os04g21710.1
LOC_Os04g21750	Q7XNI8	Q7XNI8_ORYSJ	LOC_Os04g21750.1
LOC_Os04g21800	Q7XNI4	Q7XNI4_ORYSJ	LOC_Os04g21800.1
LOC_Os04g21810	NA	NA	LOC_Os04g21810.1
LOC_Os04g21870	Q7XNH9	Q7XNH9_ORYSJ	LOC_Os04g21870.1
LOC_Os04g21930	Q7XVV2	Q7XVV2_ORYSJ	LOC_Os04g21930.1
LOC_Os04g22050	Q7XVW3	Q7XVW3_ORYSJ	LOC_Os04g22050.1
LOC_Os04g22110	Q7X7Y2	Q7X7Y2_ORYSJ	LOC_Os04g22110.1
LOC_Os04g22150	NA	NA	LOC_Os04g22150.1
LOC_Os04g22160	Q7XW52	Q7XW52_ORYSJ	LOC_Os04g22160.1
LOC_Os04g22180	Q7XW53	Q7XW53_ORYSJ	LOC_Os04g22180.1
LOC_Os04g22200	NA	NA	LOC_Os04g22200.1
LOC_Os04g22270	Q7XW59	Q7XW59_ORYSJ	LOC_Os04g22270.1
LOC_Os04g22350	NA	NA	LOC_Os04g22350.1
LOC_Os04g22370	Q7XRQ6	Q7XRQ6_ORYSJ	LOC_Os04g22370.1
LOC_Os04g22390	Q7XMT4	Q7XMT4_ORYSJ	LOC_Os04g22390.1
LOC_Os04g22400	Q7XMT3	Q7XMT3_ORYSJ	LOC_Os04g22400.1
LOC_Os04g22490	Q7XMS4	Q7XMS4_ORYSJ	LOC_Os04g22490.1
LOC_Os04g22510	Q7XMS2	Q7XMS2_ORYSJ	LOC_Os04g22510.1
LOC_Os04g22520	Q7XMS1	Q7XMS1_ORYSJ	LOC_Os04g22520.1
LOC_Os04g22550	Q7XMR9	Q7XMR9_ORYSJ	LOC_Os04g22550.1
LOC_Os04g22590	Q7XMR5	Q7XMR5_ORYSJ	LOC_Os04g22590.1
LOC_Os04g22600	Q7XMR4	Q7XMR4_ORYSJ	LOC_Os04g22600.1
LOC_Os04g22610	Q7X7F1	Q7X7F1_ORYSJ	LOC_Os04g22610.1
LOC_Os04g22630	Q7XMR3	Q7XMR3_ORYSJ	LOC_Os04g22630.1
LOC_Os04g22640	NA	NA	LOC_Os04g22640.1
LOC_Os04g22680	NA	NA	LOC_Os04g22680.1
LOC_Os04g22690	NA	NA	LOC_Os04g22690.1
LOC_Os04g22760	NA	NA	LOC_Os04g22760.1
LOC_Os04g22770	NA	NA	LOC_Os04g22770.1
LOC_Os04g22780	NA	NA	LOC_Os04g22780.1
LOC_Os04g22790	NA	NA	LOC_Os04g22790.1
LOC_Os04g22800	NA	NA	LOC_Os04g22800.1
LOC_Os04g22810	NA	NA	LOC_Os04g22810.1
LOC_Os04g22820	NA	NA	LOC_Os04g22820.1
LOC_Os04g22830	NA	NA	LOC_Os04g22830.1
LOC_Os04g22840	NA	NA	LOC_Os04g22840.1
LOC_Os04g22850	NA	NA	LOC_Os04g22850.1
LOC_Os04g22980	Q7X7N7	Q7X7N7_ORYSJ	LOC_Os04g22980.1
LOC_Os04g23030	Q7X7S0	Q7X7S0_ORYSJ	LOC_Os04g23030.1
LOC_Os04g23200	NA	NA	LOC_Os04g23200.1
LOC_Os04g23300	NA	NA	LOC_Os04g23300.1
LOC_Os04g23330	Q7XW17	Q7XW17_ORYSJ	LOC_Os04g23330.1
LOC_Os04g23340	Q7XW16	Q7XW16_ORYSJ	LOC_Os04g23340.1
LOC_Os04g23350	Q7XW15	Q7XW15_ORYSJ	LOC_Os04g23350.1
LOC_Os04g23360	Q7XW14	Q7XW14_ORYSJ	LOC_Os04g23360.1
LOC_Os04g23380	Q7XW13	Q7XW13_ORYSJ	LOC_Os04g23380.1
LOC_Os04g23420	Q7XKP6	Q7XKP6_ORYSJ	LOC_Os04g23420.1
LOC_Os04g23480	Q5JPY9	Q5JPY9_ORYSJ	LOC_Os04g23480.1
LOC_Os04g23530	NA	NA	LOC_Os04g23530.1
LOC_Os04g24400	Q7XNQ7	Q7XNQ7_ORYSJ	LOC_Os04g24400.1
LOC_Os04g24510	Q7XXL3	Q7XXL3_ORYSJ	LOC_Os04g24510.1
LOC_Os04g24750	Q7XW01	Q7XW01_ORYSJ	LOC_Os04g24750.1
LOC_Os04g24770	Q7XRX5	Q7XRX5_ORYSJ	LOC_Os04g24770.1
LOC_Os04g25270	NA	NA	LOC_Os04g25270.1
LOC_Os04g25280	Q7XVQ6	Q7XVQ6_ORYSJ	LOC_Os04g25280.1
LOC_Os04g25300	Q7XQB0	Q7XQB0_ORYSJ	LOC_Os04g25300.1
LOC_Os04g25780	Q7XPW2	Q7XPW2_ORYSJ	LOC_Os04g25780.1
LOC_Os04g34900	Q0JD70	Q0JD70_ORYSJ	LOC_Os04g34900.1
LOC_Os04g35390	NA	NA	LOC_Os04g35390.1
LOC_Os04g35410	Q0JD36	Q0JD36_ORYSJ	LOC_Os04g35410.1
LOC_Os04g35420	Q0JD35	Q0JD35_ORYSJ	LOC_Os04g35420.1
LOC_Os04g35430	Q7XQB5	Q7XQB5_ORYSJ	LOC_Os04g35430.1
LOC_Os04g35440	Q7FAJ3	Q7FAJ3_ORYSJ	LOC_Os04g35440.1
LOC_Os04g35450	Q7X6I5	Q7X6I5_ORYSJ	LOC_Os04g35450.1
LOC_Os04g35460	Q7XUZ5	Q7XUZ5_ORYSJ	LOC_Os04g35460.1
LOC_Os04g35470	Q7X7C3	Q7X7C3_ORYSJ	LOC_Os04g35470.1
LOC_Os04g35480	Q0JD33	Q0JD33_ORYSJ	LOC_Os04g35480.1
LOC_Os04g35510	B9FFA3	KN7E_ORYSJ	LOC_Os04g35510.1
LOC_Os04g39460	Q7XQN2	Q7XQN2_ORYSJ	LOC_Os04g39460.1
LOC_Os04g39520	Q7XQM8	Q7XQM8_ORYSJ	LOC_Os04g39520.1
LOC_Os04g39580	Q7XQM3	Q7XQM3_ORYSJ	LOC_Os04g39580.1
LOC_Os04g39680	Q7XR21	Q7XR21_ORYSJ	LOC_Os04g39680.1
LOC_Os04g39740	Q7XR15	Q7XR15_ORYSJ	LOC_Os04g39740.1
LOC_Os04g39910	Q7XKV1	Q7XKV1_ORYSJ	LOC_Os04g39910.1
LOC_Os04g40020	Q0JCE7	Q0JCE7_ORYSJ	LOC_Os04g40020.1
LOC_Os04g40120	Q7XK40	Q7XK40_ORYSJ	LOC_Os04g40120.1
LOC_Os04g40340	Q7XK20	Q7XK20_ORYSJ	LOC_Os04g40340.1
LOC_Os04g40470	C7J100	C7J100_ORYSJ	LOC_Os04g40470.1
LOC_Os04g40550	Q0JCB2	Q0JCB2_ORYSJ	LOC_Os04g40550.1
LOC_Os04g40910	Q7X920	Q7X920_ORYSJ	LOC_Os04g40910.1
LOC_Os04g40930	Q7XUC2	Q7XUC2_ORYSJ	LOC_Os04g40930.1
LOC_Os04g41100	Q7XUF4	CDKG2_ORYSJ	LOC_Os04g41100.1
LOC_Os04g41130	Q7XUF1	Q7XUF1_ORYSJ	LOC_Os04g41130.1
LOC_Os04g41160	Q7XUE9	Q7XUE9_ORYSJ	LOC_Os04g41160.1
LOC_Os04g41180	Q7XSB0	Q7XSB0_ORYSJ	LOC_Os04g41180.1
LOC_Os04g41270	Q7X8Y4	Q7X8Y4_ORYSJ	LOC_Os04g41270.1
LOC_Os04g41280	Q0JC61	Q0JC61_ORYSJ	LOC_Os04g41280.1
LOC_Os04g41490	Q7X881	Q7X881_ORYSJ	LOC_Os04g41490.1
LOC_Os04g41550	Q7XSB6	Q7XSB6_ORYSJ	LOC_Os04g41550.1
LOC_Os04g41570	Q7X7U7	Q7X7U7_ORYSJ	LOC_Os04g41570.1
LOC_Os04g41599	Q7XT50	Q7XT50_ORYSJ	LOC_Os04g41599.1
LOC_Os04g41630	NA	NA	LOC_Os04g41630.1
LOC_Os04g41660	Q7XT49	Q7XT49_ORYSJ	LOC_Os04g41660.1
LOC_Os04g41670	Q7XT48	Q7XT48_ORYSJ	LOC_Os04g41670.1
LOC_Os04g41690	Q7XU62	Q7XU62_ORYSJ	LOC_Os04g41690.1
LOC_Os04g41800	Q0JC31	Q0JC31_ORYSJ	LOC_Os04g41800.1
LOC_Os04g41880	NA	NA	LOC_Os04g41880.1
LOC_Os04g41890	NA	NA	LOC_Os04g41890.1
LOC_Os04g42110	Q0JC08	Q0JC08_ORYSJ	LOC_Os04g42110.1
LOC_Os04g42230	NA	NA	LOC_Os04g42230.1
LOC_Os04g42330	Q0JBZ2	Q0JBZ2_ORYSJ	LOC_Os04g42330.1
LOC_Os04g42730	Q7XUM5	Q7XUM5_ORYSJ	LOC_Os04g42730.1
LOC_Os04g42810	Q7X704	Q7X704_ORYSJ	LOC_Os04g42810.1
LOC_Os04g42850	Q7X7Z7	Q7X7Z7_ORYSJ	LOC_Os04g42850.1
LOC_Os04g42860	Q7X6N0	Q7X6N0_ORYSJ	LOC_Os04g42860.1
LOC_Os04g43060	Q7XQ13	Q7XQ13_ORYSJ	LOC_Os04g43060.1
LOC_Os04g45960	Q0JBB7	Q0JBB7_ORYSJ	LOC_Os04g45960.1
LOC_Os04g46370	Q0JB91	Q0JB91_ORYSJ	LOC_Os04g46370.1
LOC_Os04g46500	Q7XP99	Q7XP99_ORYSJ	LOC_Os04g46500.1
LOC_Os04g46670	Q0JB69	Q0JB69_ORYSJ	LOC_Os04g46670.1
LOC_Os04g46910	Q7XSN9	ADF6_ORYSJ	LOC_Os04g46910.1
LOC_Os04g46920	Q7XU06	Q7XU06_ORYSJ	LOC_Os04g46920.1
LOC_Os04g46930	Q7XSN8	SRR_ORYSJ	LOC_Os04g46930.1
LOC_Os04g46990	Q7XU02	Q7XU02_ORYSJ	LOC_Os04g46990.1
LOC_Os04g47059	Q0JB42	Q0JB42_ORYSJ	LOC_Os04g47059.1
LOC_Os04g47100	Q7XPS2	Q7XPS2_ORYSJ	LOC_Os04g47100.1
LOC_Os04g47210	NA	NA	LOC_Os04g47210.1
LOC_Os04g47350	Q7XUR5	Q7XUR5_ORYSJ	LOC_Os04g47350.1
LOC_Os04g48080	Q7XUB2	Q7XUB2_ORYSJ	LOC_Os04g48080.1
LOC_Os04g48094	Q7XRX0	Q7XRX0_ORYSJ	LOC_Os04g48094.1
LOC_Os04g48130	Q7XRW9	Q7XRW9_ORYSJ	LOC_Os04g48130.1
LOC_Os04g48180	Q7XU39	Q7XU39_ORYSJ	LOC_Os04g48180.1
LOC_Os04g48190	Q7XU40	Q7XU40_ORYSJ	LOC_Os04g48190.1
LOC_Os04g48240	Q7XU43	Q7XU43_ORYSJ	LOC_Os04g48240.1
LOC_Os04g48320	Q7XU51	Q7XU51_ORYSJ	LOC_Os04g48320.1
LOC_Os04g48375	NA	NA	LOC_Os04g48375.1
LOC_Os04g48450	Q7XTY5	Q7XTY5_ORYSJ	LOC_Os04g48450.1
LOC_Os04g48470	Q7XTY3	Q7XTY3_ORYSJ	LOC_Os04g48470.1
LOC_Os04g48540	Q7XPB5	Q7XPB5_ORYSJ	LOC_Os04g48540.1
LOC_Os04g48570	Q7XTX4	Q7XTX4_ORYSJ	LOC_Os04g48570.1
LOC_Os04g48580	Q7XTX3	Q7XTX3_ORYSJ	LOC_Os04g48580.1
LOC_Os04g48600	Q7FAS5	Q7FAS5_ORYSJ	LOC_Os04g48600.1
LOC_Os04g48630	NA	NA	LOC_Os04g48630.1
LOC_Os04g48640	Q7X825	Q7X825_ORYSJ	LOC_Os04g48640.1
LOC_Os04g48650	NA	NA	LOC_Os04g48650.1
LOC_Os04g48660	Q7XUI0	Q7XUI0_ORYSJ	LOC_Os04g48660.1
LOC_Os04g48680	Q7XUH8	Q7XUH8_ORYSJ	LOC_Os04g48680.1
LOC_Os04g49050	NA	NA	LOC_Os04g49050.1
LOC_Os04g49150	Q0JAS4	Q0JAS4_ORYSJ	LOC_Os04g49150.1
LOC_Os04g49160	Q7XUN1	Q7XUN1_ORYSJ	LOC_Os04g49160.1
LOC_Os04g49170	Q7XSR3	Q7XSR3_ORYSJ	LOC_Os04g49170.1
LOC_Os04g49180	NA	NA	LOC_Os04g49180.1
LOC_Os04g49194	Q7FAL4	Q7FAL4_ORYSJ	LOC_Os04g49194.1
LOC_Os04g49220	NA	NA	LOC_Os04g49220.1
LOC_Os04g49340	C7J1S0	C7J1S0_ORYSJ	LOC_Os04g49340.1
LOC_Os04g49394	Q7XUD1	Q7XUD1_ORYSJ	LOC_Os04g49394.1
LOC_Os04g49440	Q7F9W0	Q7F9W0_ORYSJ	LOC_Os04g49440.1
LOC_Os04g49480	Q7XUC6	Q7XUC6_ORYSJ	LOC_Os04g49480.1
LOC_Os04g49500	Q7XND9	Q7XND9_ORYSJ	LOC_Os04g49500.1
LOC_Os04g49800	Q7XN22	Q7XN22_ORYSJ	LOC_Os04g49800.1
LOC_Os04g49840	Q7XN18	Q7XN18_ORYSJ	LOC_Os04g49840.1
LOC_Os04g49870	Q7XN15	Q7XN15_ORYSJ	LOC_Os04g49870.1
LOC_Os04g50200	Q5VSW0	Q5VSW0_ORYSJ	LOC_Os04g50200.1
LOC_Os04g51390	C7J170	C7J170_ORYSJ	LOC_Os04g51390.1
LOC_Os04g51830	Q0JAB3	Q0JAB3_ORYSJ	LOC_Os04g51830.1
LOC_Os04g51840	Q7XPF6	Q7XPF6_ORYSJ	LOC_Os04g51840.1
LOC_Os04g51860	NA	NA	LOC_Os04g51860.1
LOC_Os04g51870	Q7XPF3	Q7XPF3_ORYSJ	LOC_Os04g51870.1
LOC_Os04g51880	Q0JAB2	Q0JAB2_ORYSJ	LOC_Os04g51880.1
LOC_Os04g51890	Q7XPF1	Q7XPF1_ORYSJ	LOC_Os04g51890.1
LOC_Os04g51900	Q0JAB0	Q0JAB0_ORYSJ	LOC_Os04g51900.1
LOC_Os04g51910	Q0JAA9	Q0JAA9_ORYSJ	LOC_Os04g51910.1
LOC_Os04g51920	Q7XPE8	NRX3_ORYSJ	LOC_Os04g51920.1
LOC_Os04g52340	NA	NA	LOC_Os04g52340.1
LOC_Os04g52520	Q0JA54	Q0JA54_ORYSJ	LOC_Os04g52520.1
LOC_Os04g52530	Q0JA53	Q0JA53_ORYSJ	LOC_Os04g52530.1
LOC_Os04g52540	Q7XTS4	AGO2_ORYSJ	LOC_Os04g52540.1
LOC_Os04g52550	Q7XTS3	AGO3_ORYSJ	LOC_Os04g52550.1
LOC_Os04g52560	Q0JA50	Q0JA50_ORYSJ	LOC_Os04g52560.1
LOC_Os04g52570	Q7XTS1	Q7XTS1_ORYSJ	LOC_Os04g52570.1
LOC_Os04g52580	Q7XTS0	Q7XTS0_ORYSJ	LOC_Os04g52580.1
LOC_Os04g52590	Q7XTR9	Q7XTR9_ORYSJ	LOC_Os04g52590.1
LOC_Os04g52600	Q7XTP5	Q7XTP5_ORYSJ	LOC_Os04g52600.1
LOC_Os04g52614	Q7XTP4	Q7XTP4_ORYSJ	LOC_Os04g52614.1
LOC_Os04g52630	Q0JA43	Q0JA43_ORYSJ	LOC_Os04g52630.1
LOC_Os04g52640	Q7XTP2	Q7XTP2_ORYSJ	LOC_Os04g52640.1
LOC_Os04g52650	Q7XTP1	Q7XTP1_ORYSJ	LOC_Os04g52650.1
LOC_Os04g52660	Q7XTP0	Q7XTP0_ORYSJ	LOC_Os04g52660.1
LOC_Os04g52670	Q7XTN9	Q7XTN9_ORYSJ	LOC_Os04g52670.1
LOC_Os04g52725	B9FCJ4	B9FCJ4_ORYSJ	LOC_Os04g52725.1
LOC_Os04g52780	Q7XS37	Q7XS37_ORYSJ	LOC_Os04g52780.1
LOC_Os04g52800	Q7XTU4	Q7XTU4_ORYSJ	LOC_Os04g52800.1
LOC_Os04g52820	NA	NA	LOC_Os04g52820.1
LOC_Os04g53050	Q7XTR2	Q7XTR2_ORYSJ	LOC_Os04g53050.1
LOC_Os04g53310	Q7XPQ4	Q7XPQ4_ORYSJ	LOC_Os04g53310.1
LOC_Os04g53330	Q7XPQ3	Q7XPQ3_ORYSJ	LOC_Os04g53330.1
LOC_Os04g53360	Q7XPQ0	Q7XPQ0_ORYSJ	LOC_Os04g53360.1
LOC_Os04g53380	Q0J9Y4	Q0J9Y4_ORYSJ	LOC_Os04g53380.1
LOC_Os04g53390	Q7XPP7	Q7XPP7_ORYSJ	LOC_Os04g53390.1
LOC_Os04g53400	Q7XPP6	Q7XPP6_ORYSJ	LOC_Os04g53400.1
LOC_Os04g53530	Q0J9X3	Q0J9X3_ORYSJ	LOC_Os04g53530.1
LOC_Os04g53544	Q7XM82	Q7XM82_ORYSJ	LOC_Os04g53544.1
LOC_Os04g54002	Q0J9T3	Q0J9T3_ORYSJ	LOC_Os04g54002.1
LOC_Os04g54010	Q0J9T2	Q0J9T2_ORYSJ	LOC_Os04g54010.1
LOC_Os04g54020	C7J132	C7J132_ORYSJ	LOC_Os04g54020.1
LOC_Os04g54050	Q7XQU5	Q7XQU5_ORYSJ	LOC_Os04g54050.1
LOC_Os04g54090	NA	NA	LOC_Os04g54090.1
LOC_Os04g54190	C7J137	C7J137_ORYSJ	LOC_Os04g54190.1
LOC_Os04g54390	Q7XND5	Q7XND5_ORYSJ	LOC_Os04g54390.1
LOC_Os04g54650	Q7XPH3	Q7XPH3_ORYSJ	LOC_Os04g54650.1
LOC_Os04g55510	Q7XTV7	HIP1_ORYSJ	LOC_Os04g55510.1
LOC_Os04g57730	Q4JF19	Q4JF19_ORYSJ	LOC_Os04g57730.1
LOC_Os04g59090	Q7XTL4	Q7XTL4_ORYSJ	LOC_Os04g59090.1
LOC_Os04g59110	Q7XTL2	Q7XTL2_ORYSJ	LOC_Os04g59110.1
LOC_Os05g01150	Q5KQE4	Q5KQE4_ORYSJ	LOC_Os05g01150.1
LOC_Os05g01160	Q9FW30	Q9FW30_ORYSJ	LOC_Os05g01160.1
LOC_Os05g01630	C7J2K7	C7J2K7_ORYSJ	LOC_Os05g01630.1
LOC_Os05g01650	Q65X33	Q65X33_ORYSJ	LOC_Os05g01650.1
LOC_Os05g01660	Q65X32	Q65X32_ORYSJ	LOC_Os05g01660.1
LOC_Os05g01670	NA	NA	LOC_Os05g01670.1
LOC_Os05g01675	C7IXC6	C7IXC6_ORYSJ	LOC_Os05g01675.1
LOC_Os05g01680	NA	NA	LOC_Os05g01680.1
LOC_Os05g01700	Q65X28	Q65X28_ORYSJ	LOC_Os05g01700.1
LOC_Os05g01810	Q7XBA4	Q7XBA4_ORYSJ	LOC_Os05g01810.1
LOC_Os05g02340	NA	NA	LOC_Os05g02340.1
LOC_Os05g02450	Q65XA8	Q65XA8_ORYSJ	LOC_Os05g02450.1
LOC_Os05g02840	Q0DL72	Q0DL72_ORYSJ	LOC_Os05g02840.1
LOC_Os05g03560	NA	NA	LOC_Os05g03560.1
LOC_Os05g03574	Q75IM0	Q75IM0_ORYSJ	LOC_Os05g03574.1
LOC_Os05g03590	Q0DL29	Q0DL29_ORYSJ	LOC_Os05g03590.1
LOC_Os05g03600	Q75IL9	Q75IL9_ORYSJ	LOC_Os05g03600.1
LOC_Os05g03670	Q75IL3	Q75IL3_ORYSJ	LOC_Os05g03670.1
LOC_Os05g03690	Q75IL2	Q75IL2_ORYSJ	LOC_Os05g03690.1
LOC_Os05g03800	C7J2T3	C7J2T3_ORYSJ	LOC_Os05g03800.1
LOC_Os05g04820	Q688D6	Q688D6_ORYSJ	LOC_Os05g04820.1
LOC_Os05g04930	Q75KH0	Q75KH0_ORYSJ	LOC_Os05g04930.1
LOC_Os05g05570	NA	NA	LOC_Os05g05570.1
LOC_Os05g06060	Q65XQ0	Q65XQ0_ORYSJ	LOC_Os05g06060.1
LOC_Os05g06190	C7J2V1	C7J2V1_ORYSJ	LOC_Os05g06190.1
LOC_Os05g06200	Q0DKM8	Q0DKM8_ORYSJ	LOC_Os05g06200.1
LOC_Os05g06220	NA	NA	LOC_Os05g06220.1
LOC_Os05g06590	NA	NA	LOC_Os05g06590.1
LOC_Os05g08140	NA	NA	LOC_Os05g08140.1
LOC_Os05g08150	Q65WZ9	Q65WZ9_ORYSJ	LOC_Os05g08150.1
LOC_Os05g08310	Q65WZ2	Q65WZ2_ORYSJ	LOC_Os05g08310.1
LOC_Os05g16420	NA	NA	LOC_Os05g16420.1
LOC_Os05g18230	Q60DZ9	Q60DZ9_ORYSJ	LOC_Os05g18230.1
LOC_Os05g19410	Q6ATD6	Q6ATD6_ORYSJ	LOC_Os05g19410.1
LOC_Os05g24470	NA	NA	LOC_Os05g24470.1
LOC_Os05g24601	NA	NA	LOC_Os05g24601.1
LOC_Os05g24610	C7J262	C7J262_ORYSJ	LOC_Os05g24610.1
LOC_Os05g24620	NA	NA	LOC_Os05g24620.1
LOC_Os05g24630	NA	NA	LOC_Os05g24630.1
LOC_Os05g24640	NA	NA	LOC_Os05g24640.1
LOC_Os05g24650	Q0DJ98	Q0DJ98_ORYSJ	LOC_Os05g24650.1
LOC_Os05g24730	NA	NA	LOC_Os05g24730.1
LOC_Os05g24840	NA	NA	LOC_Os05g24840.1
LOC_Os05g25110	Q5WMS6	Q5WMS6_ORYSJ	LOC_Os05g25110.1
LOC_Os05g25120	NA	NA	LOC_Os05g25120.1
LOC_Os05g26180	NA	NA	LOC_Os05g26180.1
LOC_Os05g26440	Q5W695	Q5W695_ORYSJ	LOC_Os05g26440.1
LOC_Os05g29174	NA	NA	LOC_Os05g29174.1
LOC_Os05g29740	Q6L4M7	Q6L4M7_ORYSJ	LOC_Os05g29740.1
LOC_Os05g29750	NA	NA	LOC_Os05g29750.1
LOC_Os05g29760	Q0DIV0	HEMH2_ORYSJ	LOC_Os05g29760.1
LOC_Os05g29850	Q6L4L9	Q6L4L9_ORYSJ	LOC_Os05g29850.1
LOC_Os05g31940	NA	NA	LOC_Os05g31940.1
LOC_Os05g34980	Q60EP1	Q60EP1_ORYSJ	LOC_Os05g34980.1
LOC_Os05g35110	Q60EC4	Q60EC4_ORYSJ	LOC_Os05g35110.1
LOC_Os05g36400	NA	NA	LOC_Os05g36400.1
LOC_Os05g36980	NA	NA	LOC_Os05g36980.1
LOC_Os05g37040	Q6F2M5	Q6F2M5_ORYSJ	LOC_Os05g37040.1
LOC_Os05g37050	NA	NA	LOC_Os05g37050.1
LOC_Os05g37060	Q6F2M6	Q6F2M6_ORYSJ	LOC_Os05g37060.1
LOC_Os05g37290	NA	NA	LOC_Os05g37290.1
LOC_Os05g37300	Q65WT6	Q65WT6_ORYSJ	LOC_Os05g37300.1
LOC_Os05g37480	NA	NA	LOC_Os05g37480.1
LOC_Os05g37600	Q0DHR3	Q0DHR3_ORYSJ	LOC_Os05g37600.1
LOC_Os05g37800	Q0DHQ5	Q0DHQ5_ORYSJ	LOC_Os05g37800.1
LOC_Os05g37810	NA	NA	LOC_Os05g37810.1
LOC_Os05g38360	Q65XG2	Q65XG2_ORYSJ	LOC_Os05g38360.1
LOC_Os05g38390	Q0DHL5	LAC11_ORYSJ	LOC_Os05g38390.1
LOC_Os05g38450	NA	NA	LOC_Os05g38450.1
LOC_Os05g38460	Q0DHL1	Q0DHL1_ORYSJ	LOC_Os05g38460.1
LOC_Os05g38570	NA	NA	LOC_Os05g38570.1
LOC_Os05g38610	Q9MAX5	COPZ1_ORYSJ	LOC_Os05g38610.1
LOC_Os05g38640	Q6L500	H2A4_ORYSJ	LOC_Os05g38640.1
LOC_Os05g38660	NA	NA	LOC_Os05g38660.1
LOC_Os05g38680	Q6L4Z7	Q6L4Z7_ORYSJ	LOC_Os05g38680.1
LOC_Os05g38740	NA	NA	LOC_Os05g38740.1
LOC_Os05g38750	NA	NA	LOC_Os05g38750.1
LOC_Os05g38790	Q60EQ8	Q60EQ8_ORYSJ	LOC_Os05g38790.1
LOC_Os05g38810	Q60EQ5	Q60EQ5_ORYSJ	LOC_Os05g38810.1
LOC_Os05g38840	Q60EQ2	Q60EQ2_ORYSJ	LOC_Os05g38840.1
LOC_Os05g38890	NA	NA	LOC_Os05g38890.1
LOC_Os05g38930	NA	NA	LOC_Os05g38930.1
LOC_Os05g38950	Q6I5K0	Q6I5K0_ORYSJ	LOC_Os05g38950.1
LOC_Os05g38960	Q6I5J9	Q6I5J9_ORYSJ	LOC_Os05g38960.1
LOC_Os05g38980	Q6I5U1	Q6I5U1_ORYSJ	LOC_Os05g38980.1
LOC_Os05g39020	NA	NA	LOC_Os05g39020.1
LOC_Os05g39040	Q6I5J3	Q6I5J3_ORYSJ	LOC_Os05g39040.1
LOC_Os05g39090	Q0JI08	Q0JI08_ORYSJ	LOC_Os05g39090.1
LOC_Os05g39190	Q6I5S0	Q6I5S0_ORYSJ	LOC_Os05g39190.1
LOC_Os05g39280	Q6I5R2	Q6I5R2_ORYSJ	LOC_Os05g39280.1
LOC_Os05g39300	Q6I5R1	Q6I5R1_ORYSJ	LOC_Os05g39300.1
LOC_Os05g39374	NA	NA	LOC_Os05g39374.1
LOC_Os05g39430	NA	NA	LOC_Os05g39430.1
LOC_Os05g39440	NA	NA	LOC_Os05g39440.1
LOC_Os05g39450	Q6ATX0	Q6ATX0_ORYSJ	LOC_Os05g39450.1
LOC_Os05g39460	NA	NA	LOC_Os05g39460.1
LOC_Os05g39470	NA	NA	LOC_Os05g39470.1
LOC_Os05g39490	Q6ATW7	Q6ATW7_ORYSJ	LOC_Os05g39490.1
LOC_Os05g39500	Q6ATW6	G1L8_ORYSJ	LOC_Os05g39500.1
LOC_Os05g39580	Q65WX2	Q65WX2_ORYSJ	LOC_Os05g39580.1
LOC_Os05g39730	Q65WW0	Q65WW0_ORYSJ	LOC_Os05g39730.1
LOC_Os05g39830	Q0DHC6	Q0DHC6_ORYSJ	LOC_Os05g39830.1
LOC_Os05g39890	NA	NA	LOC_Os05g39890.1
LOC_Os05g40020	Q75GN1	Q75GN1_ORYSJ	LOC_Os05g40020.1
LOC_Os05g44450	NA	NA	LOC_Os05g44450.1
LOC_Os05g47442	Q5KQD4	Q5KQD4_ORYSJ	LOC_Os05g47442.1
LOC_Os05g47446	Q6ITC5	Q6ITC5_ORYSJ	LOC_Os05g47446.1
LOC_Os05g48250	NA	NA	LOC_Os05g48250.1
LOC_Os06g01110	NA	NA	LOC_Os06g01110.1
LOC_Os06g01770	Q9LWX9	Q9LWX9_ORYSJ	LOC_Os06g01770.1
LOC_Os06g03250	NA	NA	LOC_Os06g03250.1
LOC_Os06g03320	NA	NA	LOC_Os06g03320.1
LOC_Os06g04310	Q5VNV7	Q5VNV7_ORYSJ	LOC_Os06g04310.1
LOC_Os06g04399	NA	NA	LOC_Os06g04399.1
LOC_Os06g04830	Q0DEQ9	Q0DEQ9_ORYSJ	LOC_Os06g04830.1
LOC_Os06g06014	Q5VMN6	Q5VMN6_ORYSJ	LOC_Os06g06014.1
LOC_Os06g06100	Q5VMP2	Q5VMP2_ORYSJ	LOC_Os06g06100.1
LOC_Os06g07710	Q5SNB2	Q5SNB2_ORYSJ	LOC_Os06g07710.1
LOC_Os06g08930	Q69KK7	Q69KK7_ORYSJ	LOC_Os06g08930.1
LOC_Os06g08960	Q69KK6	Q69KK6_ORYSJ	LOC_Os06g08960.1
LOC_Os06g08970	Q69KK4	Q69KK4_ORYSJ	LOC_Os06g08970.1
LOC_Os06g08980	NA	NA	LOC_Os06g08980.1
LOC_Os06g08990	Q69KK3	Q69KK3_ORYSJ	LOC_Os06g08990.1
LOC_Os06g09000	NA	NA	LOC_Os06g09000.1
LOC_Os06g09010	NA	NA	LOC_Os06g09010.1
LOC_Os06g09020	Q69KK0	Q69KK0_ORYSJ	LOC_Os06g09020.1
LOC_Os06g09840	Q69K62	Q69K62_ORYSJ	LOC_Os06g09840.1
LOC_Os06g09940	Q69K51	Q69K51_ORYSJ	LOC_Os06g09940.1
LOC_Os06g10109	Q69SR5	Q69SR5_ORYSJ	LOC_Os06g10109.1
LOC_Os06g11960	NA	NA	LOC_Os06g11960.1
LOC_Os06g13240	Q67VD7	BURP9_ORYSJ	LOC_Os06g13240.1
LOC_Os06g13270	Q0DD95	Q0DD95_ORYSJ	LOC_Os06g13270.1
LOC_Os06g13350	Q0DD90	Q0DD90_ORYSJ	LOC_Os06g13350.1
LOC_Os06g13380	NA	NA	LOC_Os06g13380.1
LOC_Os06g13490	Q67VG2	Q67VG2_ORYSJ	LOC_Os06g13490.1
LOC_Os06g13500	NA	NA	LOC_Os06g13500.1
LOC_Os06g13570	Q654G7	Q654G7_ORYSJ	LOC_Os06g13570.1
LOC_Os06g14180	Q652W5	Q652W5_ORYSJ	LOC_Os06g14180.1
LOC_Os06g14190	Q0DD61	Q0DD61_ORYSJ	LOC_Os06g14190.1
LOC_Os06g14200	Q652W2	Q652W2_ORYSJ	LOC_Os06g14200.1
LOC_Os06g14210	NA	NA	LOC_Os06g14210.1
LOC_Os06g14230	NA	NA	LOC_Os06g14230.1
LOC_Os06g14240	Q652V8	HSP16_ORYSJ	LOC_Os06g14240.1
LOC_Os06g14250	Q5JQE6	Q5JQE6_ORYSJ	LOC_Os06g14250.1
LOC_Os06g14260	Q652V6	Q652V6_ORYSJ	LOC_Os06g14260.1
LOC_Os06g14270	NA	NA	LOC_Os06g14270.1
LOC_Os06g14280	Q652V2	Q652V2_ORYSJ	LOC_Os06g14280.1
LOC_Os06g14290	NA	NA	LOC_Os06g14290.1
LOC_Os06g14300	Q652V0	Q652V0_ORYSJ	LOC_Os06g14300.1
LOC_Os06g14310	Q652U9	KAT4_ORYSJ	LOC_Os06g14310.1
LOC_Os06g14324	Q0DD57	Q0DD57_ORYSJ	LOC_Os06g14324.1
LOC_Os06g14340	NA	NA	LOC_Os06g14340.1
LOC_Os06g14350	Q652U5	Q652U5_ORYSJ	LOC_Os06g14350.1
LOC_Os06g14370	Q652U4	Q652U4_ORYSJ	LOC_Os06g14370.1
LOC_Os06g14379	NA	NA	LOC_Os06g14379.1
LOC_Os06g14390	Q652U1	Q652U1_ORYSJ	LOC_Os06g14390.1
LOC_Os06g14400	Q656N1	Q656N1_ORYSJ	LOC_Os06g14400.1
LOC_Os06g14406	Q656M9	Q656M9_ORYSJ	LOC_Os06g14406.1
LOC_Os06g14420	Q656M7	Q656M7_ORYSJ	LOC_Os06g14420.1
LOC_Os06g14430	NA	NA	LOC_Os06g14430.1
LOC_Os06g14440	C7J5M6	C7J5M6_ORYSJ	LOC_Os06g14440.1
LOC_Os06g14450	Q0DD48	Q0DD48_ORYSJ	LOC_Os06g14450.1
LOC_Os06g14460	Q652G8	Q652G8_ORYSJ	LOC_Os06g14460.1
LOC_Os06g14470	Q652G7	Q652G7_ORYSJ	LOC_Os06g14470.1
LOC_Os06g14480	NA	NA	LOC_Os06g14480.1
LOC_Os06g14490	Q0D6G7	Q0D6G7_ORYSJ	LOC_Os06g14490.1
LOC_Os06g14500	NA	NA	LOC_Os06g14500.1
LOC_Os06g14510	Q0DD43	Q0DD43_ORYSJ	LOC_Os06g14510.1
LOC_Os06g14520	NA	NA	LOC_Os06g14520.1
LOC_Os06g14530	Q652G0	Q652G0_ORYSJ	LOC_Os06g14530.1
LOC_Os06g14540	Q652F9	GUN17_ORYSJ	LOC_Os06g14540.1
LOC_Os06g14550	Q652F6	Q652F6_ORYSJ	LOC_Os06g14550.1
LOC_Os06g14620	C7J3K0	C7J3K0_ORYSJ	LOC_Os06g14620.1
LOC_Os06g14630	Q652E9	Q652E9_ORYSJ	LOC_Os06g14630.1
LOC_Os06g14640	Q652E8	Q652E8_ORYSJ	LOC_Os06g14640.1
LOC_Os06g14650	NA	NA	LOC_Os06g14650.1
LOC_Os06g14660	Q652E7	Q652E7_ORYSJ	LOC_Os06g14660.1
LOC_Os06g14680	Q7XL25	Q7XL25_ORYSJ	LOC_Os06g14680.1
LOC_Os06g14700	Q652S7	Q652S7_ORYSJ	LOC_Os06g14700.1
LOC_Os06g14710	Q652S6	Q652S6_ORYSJ	LOC_Os06g14710.1
LOC_Os06g14720	Q652S4	Q652S4_ORYSJ	LOC_Os06g14720.1
LOC_Os06g14730	C7J3M2	C7J3M2_ORYSJ	LOC_Os06g14730.1
LOC_Os06g14740	Q652S0	Q652S0_ORYSJ	LOC_Os06g14740.1
LOC_Os06g14750	Q0DD35	Q0DD35_ORYSJ	LOC_Os06g14750.1
LOC_Os06g14770	Q652R3	Q652R3_ORYSJ	LOC_Os06g14770.1
LOC_Os06g14780	Q0DD34	Q0DD34_ORYSJ	LOC_Os06g14780.1
LOC_Os06g14790	Q5Z7F3	Q5Z7F3_ORYSJ	LOC_Os06g14790.1
LOC_Os06g14800	Q5Z7F1	Q5Z7F1_ORYSJ	LOC_Os06g14800.1
LOC_Os06g14810	Q5Z7E7	Q5Z7E7_ORYSJ	LOC_Os06g14810.1
LOC_Os06g14820	Q5Z7E6	Q5Z7E6_ORYSJ	LOC_Os06g14820.1
LOC_Os06g14830	NA	NA	LOC_Os06g14830.1
LOC_Os06g14840	NA	NA	LOC_Os06g14840.1
LOC_Os06g14850	NA	NA	LOC_Os06g14850.1
LOC_Os06g14870	Q5Z7E2	Q5Z7E2_ORYSJ	LOC_Os06g14870.1
LOC_Os06g14890	NA	NA	LOC_Os06g14890.1
LOC_Os06g14910	NA	NA	LOC_Os06g14910.1
LOC_Os06g14920	NA	NA	LOC_Os06g14920.1
LOC_Os06g14930	NA	NA	LOC_Os06g14930.1
LOC_Os06g14960	NA	NA	LOC_Os06g14960.1
LOC_Os06g14970	NA	NA	LOC_Os06g14970.1
LOC_Os06g14980	NA	NA	LOC_Os06g14980.1
LOC_Os06g14990	NA	NA	LOC_Os06g14990.1
LOC_Os06g15010	Q5Z7C9	Q5Z7C9_ORYSJ	LOC_Os06g15010.1
LOC_Os06g15020	Q5Z7C8	Q5Z7C8_ORYSJ	LOC_Os06g15020.1
LOC_Os06g15030	NA	NA	LOC_Os06g15030.1
LOC_Os06g15040	NA	NA	LOC_Os06g15040.1
LOC_Os06g15050	NA	NA	LOC_Os06g15050.1
LOC_Os06g15060	NA	NA	LOC_Os06g15060.1
LOC_Os06g15080	Q5Z7W4	Q5Z7W4_ORYSJ	LOC_Os06g15080.1
LOC_Os06g15090	NA	NA	LOC_Os06g15090.1
LOC_Os06g15100	NA	NA	LOC_Os06g15100.1
LOC_Os06g15110	NA	NA	LOC_Os06g15110.1
LOC_Os06g15120	NA	NA	LOC_Os06g15120.1
LOC_Os06g15130	Q5Z6S6	Q5Z6S6_ORYSJ	LOC_Os06g15130.1
LOC_Os06g15140	NA	NA	LOC_Os06g15140.1
LOC_Os06g15150	NA	NA	LOC_Os06g15150.1
LOC_Os06g15170	Q5Z6S3	Q5Z6S3_ORYSJ	LOC_Os06g15170.1
LOC_Os06g15180	NA	NA	LOC_Os06g15180.1
LOC_Os06g15190	NA	NA	LOC_Os06g15190.1
LOC_Os06g15200	NA	NA	LOC_Os06g15200.1
LOC_Os06g15220	Q5Z6S0	Q5Z6S0_ORYSJ	LOC_Os06g15220.1
LOC_Os06g15230	NA	NA	LOC_Os06g15230.1
LOC_Os06g15240	Q5Z6R9	Q5Z6R9_ORYSJ	LOC_Os06g15240.1
LOC_Os06g15250	Q5Z6R6	Q5Z6R6_ORYSJ	LOC_Os06g15250.1
LOC_Os06g15260	NA	NA	LOC_Os06g15260.1
LOC_Os06g15270	NA	NA	LOC_Os06g15270.1
LOC_Os06g15280	Q5Z6R1	Q5Z6R1_ORYSJ	LOC_Os06g15280.1
LOC_Os06g15310	NA	NA	LOC_Os06g15310.1
LOC_Os06g15320	NA	NA	LOC_Os06g15320.1
LOC_Os06g15330	Q0DD26	Q0DD26_ORYSJ	LOC_Os06g15330.1
LOC_Os06g15340	NA	NA	LOC_Os06g15340.1
LOC_Os06g15350	NA	NA	LOC_Os06g15350.1
LOC_Os06g15360	Q5Z6P9	Q5Z6P9_ORYSJ	LOC_Os06g15360.1
LOC_Os06g15370	Q5Z6P7	Q5Z6P7_ORYSJ	LOC_Os06g15370.1
LOC_Os06g15400	Q5Z6P4	Q5Z6P4_ORYSJ	LOC_Os06g15400.1
LOC_Os06g15410	Q5Z6P3	Q5Z6P3_ORYSJ	LOC_Os06g15410.1
LOC_Os06g15420	Q43011	ASNS2_ORYSJ	LOC_Os06g15420.1
LOC_Os06g15430	Q0DD18	Q0DD18_ORYSJ	LOC_Os06g15430.1
LOC_Os06g15440	Q5Z6P0	Q5Z6P0_ORYSJ	LOC_Os06g15440.1
LOC_Os06g15450	NA	NA	LOC_Os06g15450.1
LOC_Os06g15460	NA	NA	LOC_Os06g15460.1
LOC_Os06g15470	NA	NA	LOC_Os06g15470.1
LOC_Os06g15480	Q8S7D0	Q8S7D0_ORYSJ	LOC_Os06g15480.1
LOC_Os06g15490	Q5Z6N8	Q5Z6N8_ORYSJ	LOC_Os06g15490.1
LOC_Os06g15570	Q0DD14	Q0DD14_ORYSJ	LOC_Os06g15570.1
LOC_Os06g15600	Q5Z6N2	Q5Z6N2_ORYSJ	LOC_Os06g15600.1
LOC_Os06g15610	NA	NA	LOC_Os06g15610.1
LOC_Os06g15620	Q5Z6N0	Q5Z6N0_ORYSJ	LOC_Os06g15620.1
LOC_Os06g15680	Q5Z9V4	Q5Z9V4_ORYSJ	LOC_Os06g15680.1
LOC_Os06g15740	Q5Z9U7	Q5Z9U7_ORYSJ	LOC_Os06g15740.1
LOC_Os06g15800	Q5Z6M2	Q5Z6M2_ORYSJ	LOC_Os06g15800.1
LOC_Os06g15810	Q0DD04	Q0DD04_ORYSJ	LOC_Os06g15810.1
LOC_Os06g15830	Q5Z6L7	Q5Z6L7_ORYSJ	LOC_Os06g15830.1
LOC_Os06g15870	NA	NA	LOC_Os06g15870.1
LOC_Os06g15880	NA	NA	LOC_Os06g15880.1
LOC_Os06g15900	Q5Z6L2	Q5Z6L2_ORYSJ	LOC_Os06g15900.1
LOC_Os06g15910	Q5Z6K9	HAK24_ORYSJ	LOC_Os06g15910.1
LOC_Os06g15990	Q9FRX7	Q9FRX7_ORYSJ	LOC_Os06g15990.1
LOC_Os06g16170	Q5VQ36	Q5VQ36_ORYSJ	LOC_Os06g16170.1
LOC_Os06g16180	Q5VQ35	Q5VQ35_ORYSJ	LOC_Os06g16180.1
LOC_Os06g16280	Q0DCY6	Q0DCY6_ORYSJ	LOC_Os06g16280.1
LOC_Os06g16290	Q9FP19	Q9FP19_ORYSJ	LOC_Os06g16290.1
LOC_Os06g16340	Q8H2H3	Q8H2H3_ORYSJ	LOC_Os06g16340.1
LOC_Os06g16360	Q8H2H1	Q8H2H1_ORYSJ	LOC_Os06g16360.1
LOC_Os06g16370	Q9FDX8	HD1_ORYSJ	LOC_Os06g16370.1
LOC_Os06g16500	NA	NA	LOC_Os06g16500.1
LOC_Os06g16590	Q5VPV7	Q5VPV7_ORYSJ	LOC_Os06g16590.1
LOC_Os06g16600	NA	NA	LOC_Os06g16600.1
LOC_Os06g16630	NA	NA	LOC_Os06g16630.1
LOC_Os06g16670	NA	NA	LOC_Os06g16670.1
LOC_Os06g16700	Q6EPH2	Q6EPH2_ORYSJ	LOC_Os06g16700.1
LOC_Os06g16730	Q5VPT9	Q5VPT9_ORYSJ	LOC_Os06g16730.1
LOC_Os06g16890	NA	NA	LOC_Os06g16890.1
LOC_Os06g16970	Q5VMY5	Q5VMY5_ORYSJ	LOC_Os06g16970.1
LOC_Os06g17000	Q5VN46	BURPA_ORYSJ	LOC_Os06g17000.1
LOC_Os06g17020	Q5VN44	Q5VN44_ORYSJ	LOC_Os06g17020.1
LOC_Os06g17300	Q5VMR3	Q5VMR3_ORYSJ	LOC_Os06g17300.1
LOC_Os06g17320	NA	NA	LOC_Os06g17320.1
LOC_Os06g17950	NA	NA	LOC_Os06g17950.1
[truncated: 2,582 more rows]

## Sheet: GO
GO term	Ontology	Description	Number in input list	Number in BG/Ref	p-value	FDR
GO:0006259	P	DNA metabolic process	521	4515	3.3e-16	5e-13
GO:0006278	P	RNA-dependent DNA replication	345	2826	2.7e-13	2.1e-10
GO:0006260	P	DNA replication	351	2898	4.2e-13	2.1e-10
GO:0015074	P	DNA integration	367	3168	2.3e-11	8.8e-09
GO:0006807	P	nitrogen compound metabolic process	700	7073	4.4e-09	1.1e-06
GO:0006139	P	nucleobase, nucleoside, nucleotide and nucleic acid metabolic process	668	6695	3.8e-09	1.1e-06
GO:0043170	P	macromolecule metabolic process	945	10433	2e-05	0.0043
GO:0044260	P	cellular macromolecule metabolic process	851	9350	4.5e-05	0.0086
GO:0044237	P	cellular metabolic process	958	10696	9.3e-05	0.016
GO:0034645	P	cellular macromolecule biosynthetic process	500	5248	0.00011	0.016
GO:0009059	P	macromolecule biosynthetic process	500	5252	0.00011	0.016
GO:0044249	P	cellular biosynthetic process	553	5890	0.00016	0.02
GO:0044238	P	primary metabolic process	1057	11969	0.00022	0.025
GO:0006333	P	chromatin assembly or disassembly	113	982	0.00039	0.043
GO:0006325	P	chromatin organization	116	1018	0.00046	0.047
GO:0034061	F	DNA polymerase activity	348	2851	2.1e-13	1.3e-10
GO:0003964	F	RNA-directed DNA polymerase activity	345	2826	2.7e-13	1.3e-10
GO:0016779	F	nucleotidyltransferase activity	354	2981	3.4e-12	1.1e-09
GO:0003723	F	RNA binding	369	3190	2.4e-11	5.8e-09
GO:0003676	F	nucleic acid binding	813	8251	1.4e-10	2.7e-08
GO:0016772	F	transferase activity, transferring phosphorus-containing groups	492	4781	3.9e-08	6.3e-06
GO:0005488	F	binding	1482	16823	4.8e-08	6.6e-06
GO:0003677	F	DNA binding	504	5059	1.1e-06	0.00013
GO:0008270	F	zinc ion binding	401	3939	3.1e-06	0.00034
GO:0004523	F	ribonuclease H activity	142	1194	1.7e-05	0.0017
GO:0004521	F	endoribonuclease activity	144	1221	2.2e-05	0.0019
GO:0004519	F	endonuclease activity	147	1253	2.3e-05	0.0019
GO:0016891	F	endoribonuclease activity, producing 5'-phosphomonoesters	142	1210	3.1e-05	0.0023
GO:0016893	F	endonuclease activity, active with either ribo- or deoxyribonucleic acids and producing 5'-phosphomonoesters	142	1214	3.6e-05	0.0025
GO:0016740	F	transferase activity	585	6190	4.6e-05	0.0028
GO:0004518	F	nuclease activity	153	1337	4.9e-05	0.0028
GO:0004540	F	ribonuclease activity	144	1241	4.5e-05	0.0028
GO:0003682	F	chromatin binding	109	913	0.00014	0.0078
GO:0043169	F	cation binding	531	5696	0.00043	0.022
GO:0043167	F	ion binding	531	5700	0.00046	0.022
GO:0016788	F	hydrolase activity, acting on ester bonds	202	1949	0.00054	0.025
GO:0046914	F	transition metal ion binding	459	4875	0.00059	0.026
GO:0046872	F	metal ion binding	507	5476	0.0011	0.045
GO:0044427	C	chromosomal part	114	989	0.00035	0.037
GO:0000785	C	chromatin	113	973	0.00029	0.037
GO:0005694	C	chromosome	115	1018	0.00064	0.046

## Sheet: KEGG
ID	Description	GeneRatio	BgRatio	pvalue	p.adjust	qvalue	geneID	Count
dosa00904	Diterpenoid biosynthesis	9/325	41/4616	0.00177871	0.177871	0.177871	Os01t0177400-01/Os02t0569900-01/Os02t0570400-01/Os02t0570500-01/Os02t0570700-01/Os02t0571300-01/Os02t0571800-00/Os02t0571900-01/Os06t0599200-01	9
dosa00790	Folate biosynthesis	6/325	27/4616	0.00972125	0.486063	0.486063	Os02t0258900-01/Os02t0572400-01/Os05t0460600-01/Os06t0154600-00/Os07t0618500-01/Os12t0507000-01	6
dosa00261	Monobactam biosynthesis	3/325	11/4616	0.037342	0.881175	0.881175	Os03t0850400-01/Os04t0574800-00/Os07t0300900-01	3
