# Supplementary material for: Whole Genome Resequencing of 20 Accessions of Rice Landraces Reveals Javanica Genomic Structure Variation and Allelic Genotypes of a Grain Weight Gene TGW2
Source: Front Plant Sci. 2022 Apr 25;13:857435. doi: 10.3389/fpls.2022.857435 (PMC9083905; doi:10.3389/fpls.2022.857435)
Supplement: Supplementary file 8 [file Table_5.XLSX]

## Sheet: Sheet1
Chromosome	Start	End	N_snp
Chr8	9560000	9570000	1	1	1
Chr6	28700000	28710000	142	0.977398	0.952801
Chr7	10750000	10760000	123	0.952622	0.912085
Chr2	8610000	8620000	123	0.957857	0.909548
Chr9	16560000	16570000	99	0.942357	0.902354
Chr12	8090000	8100000	34	0.938175	0.896524
Chr12	8670000	8680000	44	0.941164	0.895888
Chr1	12590000	12600000	116	0.940946	0.890907
Chr7	11270000	11280000	120	0.927613	0.873839
