# Supplementary material for: Whole Genome Resequencing of 20 Accessions of Rice Landraces Reveals Javanica Genomic Structure Variation and Allelic Genotypes of a Grain Weight Gene TGW2
Source: Front Plant Sci. 2022 Apr 25;13:857435. doi: 10.3389/fpls.2022.857435 (PMC9083905; doi:10.3389/fpls.2022.857435)
Supplement: Supplementary file 9 [file Table_6.XLSX]

## Sheet: Sheet1
Chr3	700000	710000	111	0.998647	0.998578
Chr12	1450000	1460000	46	0.996728	0.996568
Chr3	1400000	1410000	61	0.996302	0.99607
Chr9	21860000	21870000	71	0.995606	0.995359
Chr4	34320000	34330000	117	0.995541	0.995126
Chr4	29520000	29530000	63	0.995132	0.994883
Chr4	23860000	23870000	188	0.995041	0.994492
Chr3	32080000	32090000	35	0.994173	0.993905
Chr4	23610000	23620000	91	0.994108	0.993712
Chr3	670000	680000	76	0.993868	0.993558
Chr7	6800000	6810000	48	0.993653	0.993363
Chr1	27000000	27010000	38	0.993303	0.992847
Chr1	32920000	32930000	47	0.992445	0.991873
Chr1	38480000	38490000	58	0.992085	0.991546
Chr12	5160000	5170000	64	0.993176	0.991502
Chr3	5280000	5290000	36	0.991526	0.991143
Chr8	1520000	1530000	34	0.991475	0.990736
Chr2	4270000	4280000	68	0.991019	0.990626
Chr6	28910000	28920000	232	0.99507	0.99029
Chr1	38670000	38680000	73	0.992657	0.988747
Chr9	13710000	13720000	77	0.988807	0.98806
Chr5	17340000	17350000	69	0.993818	0.987954
Chr1	37720000	37730000	38	0.988016	0.987535
Chr2	33500000	33510000	37	0.987618	0.987115
Chr8	22860000	22870000	41	0.987654	0.986878
Chr4	28710000	28720000	89	0.987774	0.98679
Chr1	39930000	39940000	34	0.986587	0.985724
Chr6	7460000	7470000	226	0.992218	0.985595
Chr3	5130000	5140000	90	0.992895	0.984829
Chr1	38500000	38510000	44	0.985393	0.984074
Chr4	31090000	31100000	165	0.995357	0.983972
Chr7	6870000	6880000	129	0.986867	0.983948
Chr9	12980000	12990000	176	0.989421	0.983134
Chr11	10000000	10010000	10	0.983404	0.982587
Chr5	21040000	21050000	78	0.994101	0.982353
Chr4	34350000	34360000	116	0.991584	0.982033
Chr1	40720000	40730000	42	0.986279	0.981899
Chr4	23850000	23860000	117	0.993461	0.981864
Chr4	35070000	35080000	113	0.990594	0.981558
Chr9	18810000	18820000	67	0.994647	0.981101
Chr3	560000	570000	143	0.994178	0.981001
Chr3	4930000	4940000	128	0.988462	0.980497
Chr1	10350000	10360000	62	0.985778	0.980459
Chr6	28340000	28350000	78	0.992385	0.980445
Chr3	4820000	4830000	69	0.990693	0.980127
Chr4	35040000	35050000	90	0.98887	0.979922
Chr1	40960000	40970000	84	0.994202	0.979602
Chr3	3260000	3270000	110	0.988158	0.979438
Chr4	28540000	28550000	124	0.993879	0.979374
Chr8	2160000	2170000	80	0.990021	0.979345
Chr9	18550000	18560000	89	0.990811	0.978564
Chr11	7670000	7680000	84	0.989525	0.978478
Chr4	27270000	27280000	70	0.991066	0.97797
Chr7	5810000	5820000	59	0.990467	0.977951
Chr6	22950000	22960000	110	0.980344	0.977943
Chr6	28130000	28140000	77	0.990575	0.977751
Chr9	17860000	17870000	49	0.991972	0.977375
Chr3	17250000	17260000	134	0.988897	0.977345
Chr3	5110000	5120000	90	0.988505	0.977343
Chr4	25100000	25110000	63	0.992537	0.977155
Chr8	22130000	22140000	133	0.98299	0.976593
Chr7	5240000	5250000	47	0.991666	0.976476
Chr2	34200000	34210000	35	0.978369	0.975983
Chr1	28960000	28970000	148	0.988314	0.975896
Chr6	13740000	13750000	87	0.994386	0.975869
Chr12	7800000	7810000	129	0.986214	0.975662
Chr8	22940000	22950000	86	0.990219	0.975575
Chr1	27670000	27680000	47	0.995588	0.975298
Chr8	2140000	2150000	141	0.994588	0.975215
Chr3	5680000	5690000	42	0.992015	0.975077
Chr3	35760000	35770000	57	0.990978	0.975015
Chr8	1700000	1710000	60	0.990264	0.975007
Chr7	22690000	22700000	60	0.989718	0.97451
Chr4	28650000	28660000	99	0.990088	0.973148
Chr1	27310000	27320000	59	0.988313	0.973087
Chr8	2310000	2320000	86	0.989709	0.972766
Chr3	5240000	5250000	164	0.990025	0.972246
Chr6	7340000	7350000	219	0.988591	0.97184
Chr9	12700000	12710000	54	0.988545	0.971678
Chr4	24430000	24440000	39	0.994737	0.97166
Chr1	31050000	31060000	113	0.989351	0.971591
Chr4	25190000	25200000	52	0.989638	0.971584
Chr3	5180000	5190000	94	0.988862	0.971478
Chr4	28740000	28750000	56	0.987115	0.971302
Chr6	25670000	25680000	41	0.987834	0.971274
Chr5	21930000	21940000	131	0.98676	0.971125
Chr1	37650000	37660000	52	0.973668	0.970949
Chr8	1540000	1550000	140	0.989476	0.970882
Chr5	20760000	20770000	94	0.990136	0.970852
Chr9	12970000	12980000	120	0.985998	0.970748
Chr3	5160000	5170000	69	0.985641	0.970601
Chr3	1420000	1430000	98	0.988454	0.970372
Chr9	17450000	17460000	106	0.990517	0.97005
Chr3	4800000	4810000	112	0.987491	0.969579
Chr7	5820000	5830000	49	0.970588	0.969447
Chr12	3180000	3190000	44	0.985315	0.969032
Chr12	5380000	5390000	119	0.98592	0.969015
Chr7	22820000	22830000	68	0.987316	0.968761
Chr9	17920000	17930000	84	0.992029	0.968479
Chr1	41080000	41090000	35	0.994044	0.968333
Chr8	1680000	1690000	38	0.987052	0.968298
Chr1	39200000	39210000	96	0.994574	0.968198
Chr5	20890000	20900000	78	0.991227	0.968172
Chr3	35770000	35780000	21	0.969071	0.968013
Chr4	29490000	29500000	48	0.987735	0.967693
Chr11	1390000	1400000	75	0.991241	0.967577
Chr7	27720000	27730000	150	0.98618	0.967572
Chr1	9650000	9660000	91	0.984007	0.967564
Chr1	14220000	14230000	184	0.981597	0.967395
Chr7	24020000	24030000	47	0.986842	0.967152
Chr9	18580000	18590000	75	0.988927	0.96694
Chr7	24560000	24570000	161	0.984749	0.966913
Chr8	22990000	23000000	71	0.976602	0.966625
Chr9	12910000	12920000	52	0.984224	0.966584
Chr8	23250000	23260000	131	0.984434	0.966537
Chr4	24460000	24470000	80	0.98505	0.966228
Chr4	24490000	24500000	56	0.975356	0.966191
Chr10	22200000	22210000	70	0.991894	0.966165
Chr7	22960000	22970000	199	0.987609	0.966119
Chr9	12830000	12840000	84	0.985667	0.965915
Chr8	23320000	23330000	91	0.986089	0.965909
Chr1	29140000	29150000	120	0.987943	0.965906
Chr1	31300000	31310000	126	0.985278	0.96587
Chr7	24790000	24800000	64	0.99105	0.965726
Chr12	1360000	1370000	48	0.984681	0.965583
Chr11	1540000	1550000	71	0.988658	0.965564
Chr6	28230000	28240000	46	0.985236	0.965474
Chr1	27710000	27720000	99	0.987512	0.965344
Chr9	12220000	12230000	130	0.982763	0.965322
Chr9	18740000	18750000	101	0.983485	0.965163
Chr2	20260000	20270000	44	0.981742	0.965159
Chr8	17380000	17390000	146	0.985588	0.965113
Chr6	28900000	28910000	77	0.982695	0.96505
Chr1	29190000	29200000	75	0.984328	0.964843
Chr1	30290000	30300000	106	0.98427	0.964724
Chr5	22990000	23000000	92	0.992922	0.964555
Chr4	34290000	34300000	131	0.9926	0.964402
Chr1	38540000	38550000	98	0.991117	0.964317
Chr5	23430000	23440000	73	0.982688	0.964312
Chr5	20660000	20670000	97	0.983421	0.964026
Chr1	30370000	30380000	108	0.983287	0.963877
Chr5	20810000	20820000	79	0.987204	0.963831
Chr8	22120000	22130000	149	0.980973	0.963746
Chr5	23420000	23430000	45	0.983908	0.963743
Chr10	21360000	21370000	113	0.988876	0.963658
Chr3	32170000	32180000	63	0.990241	0.963587
Chr8	2200000	2210000	80	0.984627	0.963391
Chr6	25790000	25800000	116	0.986701	0.96327
Chr4	28830000	28840000	66	0.98533	0.963182
Chr3	4830000	4840000	117	0.98708	0.963165
Chr6	13650000	13660000	125	0.987583	0.963044
Chr5	23250000	23260000	78	0.984464	0.963032
Chr9	22860000	22870000	98	0.978286	0.962993
Chr5	21050000	21060000	72	0.987748	0.962889
Chr1	10360000	10370000	67	0.989793	0.96282
Chr9	13660000	13670000	92	0.99006	0.962814
Chr11	1400000	1410000	58	0.992911	0.962792
Chr10	21310000	21320000	31	0.985625	0.962747
Chr1	10430000	10440000	117	0.990364	0.962708
Chr12	1630000	1640000	90	0.985553	0.962651
Chr3	5580000	5590000	53	0.987976	0.962504
Chr8	23080000	23090000	74	0.979436	0.962349
Chr5	22970000	22980000	61	0.984801	0.962276
Chr6	13730000	13740000	121	0.982562	0.962256
Chr1	27830000	27840000	72	0.985092	0.962229
Chr1	40000000	40010000	126	0.985123	0.961581
Chr1	31160000	31170000	100	0.987363	0.961415
Chr3	1330000	1340000	93	0.984409	0.961072
Chr9	21760000	21770000	168	0.986165	0.961028
Chr4	24420000	24430000	95	0.980044	0.960958
Chr8	22140000	22150000	177	0.991027	0.960863
Chr6	12250000	12260000	112	0.985464	0.960773
Chr5	21220000	21230000	81	0.979707	0.960262
Chr9	12660000	12670000	58	0.991055	0.960073
Chr8	22970000	22980000	58	0.982043	0.959997
Chr8	11100000	11110000	56	0.976835	0.959984
Chr1	31280000	31290000	81	0.985826	0.95975
Chr9	12740000	12750000	101	0.988603	0.959713
Chr1	37740000	37750000	97	0.988118	0.959445
Chr12	2390000	2400000	62	0.989853	0.959042
Chr8	22660000	22670000	77	0.991673	0.958982
Chr11	7730000	7740000	139	0.977955	0.958927
Chr9	17640000	17650000	43	0.987174	0.958857
Chr5	23270000	23280000	84	0.984629	0.958778
Chr1	28920000	28930000	111	0.979415	0.958745
Chr8	23550000	23560000	91	0.984858	0.958606
Chr8	2360000	2370000	104	0.987904	0.958593
Chr4	28610000	28620000	71	0.984298	0.958498
Chr6	25690000	25700000	56	0.977667	0.958191
Chr7	6890000	6900000	133	0.985574	0.958124
Chr1	30440000	30450000	60	0.979864	0.957935
Chr7	6840000	6850000	81	0.975875	0.957819
Chr2	3870000	3880000	84	0.984796	0.957743
Chr9	18750000	18760000	138	0.98212	0.957569
Chr1	28830000	28840000	87	0.981139	0.957421
Chr8	2390000	2400000	75	0.989128	0.957349
Chr6	28190000	28200000	64	0.985366	0.957237
Chr5	23450000	23460000	112	0.98395	0.957132
Chr1	38660000	38670000	131	0.979906	0.956779
Chr12	1370000	1380000	81	0.990821	0.956172
Chr3	6570000	6580000	76	0.988506	0.956171
Chr10	20840000	20850000	76	0.984083	0.95591
Chr5	23300000	23310000	108	0.987615	0.955909
Chr10	21140000	21150000	96	0.984184	0.955758
Chr9	18000000	18010000	82	0.988574	0.955659
Chr10	1080000	1090000	27	0.981778	0.955638
Chr1	27840000	27850000	98	0.982832	0.955253
Chr5	20800000	20810000	75	0.986104	0.9552
Chr4	35050000	35060000	82	0.984909	0.955099
Chr6	28330000	28340000	93	0.983833	0.954969
Chr5	23480000	23490000	77	0.984914	0.954926
Chr6	12430000	12440000	66	0.986919	0.954779
Chr4	25220000	25230000	60	0.989092	0.954776
Chr2	33430000	33440000	60	0.985481	0.954742
Chr4	28860000	28870000	63	0.982118	0.954507
Chr8	2260000	2270000	142	0.981256	0.95445
Chr7	22870000	22880000	71	0.991422	0.954447
Chr1	27260000	27270000	29	0.985612	0.954426
Chr1	29270000	29280000	113	0.986481	0.954395
Chr3	6760000	6770000	102	0.988445	0.954288
Chr3	1610000	1620000	63	0.984783	0.954239
Chr3	620000	630000	55	0.983651	0.954058
Chr2	220000	230000	82	0.987637	0.953928
Chr1	35830000	35840000	50	0.985881	0.953818
Chr4	24780000	24790000	113	0.981228	0.953581
Chr1	39010000	39020000	45	0.980665	0.953216
Chr9	16470000	16480000	65	0.987169	0.952854
Chr1	37640000	37650000	111	0.989596	0.952523
Chr5	23240000	23250000	113	0.967809	0.952221
Chr9	12650000	12660000	94	0.990485	0.952164
Chr9	17830000	17840000	64	0.988925	0.952115
Chr9	17780000	17790000	77	0.979313	0.951752
Chr12	19600000	19610000	149	0.981915	0.951701
Chr6	28100000	28110000	105	0.983819	0.951086
Chr9	22010000	22020000	122	0.987577	0.950858
Chr6	13550000	13560000	166	0.98919	0.950848
Chr8	22200000	22210000	61	0.975591	0.95082
Chr5	21660000	21670000	29	0.976334	0.950797
Chr9	17980000	17990000	121	0.98768	0.950785
Chr1	37540000	37550000	111	0.983017	0.950488
Chr9	12870000	12880000	149	0.980403	0.950447
Chr3	6160000	6170000	40	0.986038	0.950292
Chr4	29340000	29350000	173	0.987199	0.950222
Chr6	23130000	23140000	206	0.97449	0.950221
Chr3	1020000	1030000	44	0.976643	0.950058
Chr1	37960000	37970000	65	0.990894	0.949729
Chr9	16810000	16820000	78	0.971142	0.949659
Chr8	23120000	23130000	114	0.979009	0.949573
Chr6	28260000	28270000	100	0.976104	0.949489
Chr8	22490000	22500000	64	0.988079	0.949105
Chr1	38640000	38650000	63	0.982763	0.94899
Chr7	27730000	27740000	113	0.988854	0.948989
Chr1	37680000	37690000	49	0.987706	0.948901
Chr2	170000	180000	45	0.988476	0.948429
Chr3	4750000	4760000	90	0.97864	0.94837
Chr5	23320000	23330000	52	0.976775	0.948276
Chr3	4990000	5000000	65	0.986638	0.948268
Chr9	12730000	12740000	82	0.981962	0.948238
Chr5	23310000	23320000	42	0.97233	0.948017
Chr6	12690000	12700000	93	0.985925	0.94788
Chr8	22690000	22700000	117	0.984722	0.947667
Chr1	37390000	37400000	71	0.985606	0.94765
Chr9	18500000	18510000	73	0.984147	0.947424
Chr9	12710000	12720000	122	0.982132	0.94742
Chr6	25780000	25790000	143	0.980029	0.947167
Chr3	35780000	35790000	36	0.95841	0.947163
Chr7	6760000	6770000	86	0.989256	0.947076
Chr1	32880000	32890000	87	0.980692	0.947059
Chr1	9850000	9860000	101	0.98461	0.947001
Chr5	21100000	21110000	145	0.972099	0.946965
Chr6	23650000	23660000	96	0.981475	0.946947
Chr6	13760000	13770000	60	0.98588	0.946686
Chr5	20990000	21000000	76	0.99091	0.946666
Chr6	28880000	28890000	90	0.979265	0.946614
Chr1	38940000	38950000	142	0.987118	0.946566
Chr7	4780000	4790000	28	0.967173	0.946513
Chr9	13700000	13710000	96	0.977979	0.946278
Chr6	28520000	28530000	125	0.987312	0.946084
Chr1	29100000	29110000	114	0.979626	0.945919
Chr8	1730000	1740000	76	0.974115	0.945472
Chr8	23050000	23060000	100	0.982575	0.945406
Chr9	12810000	12820000	135	0.980683	0.945351
Chr7	6900000	6910000	128	0.977434	0.944997
Chr1	10290000	10300000	78	0.980433	0.944981
Chr12	1420000	1430000	97	0.986446	0.944613
Chr1	30510000	30520000	150	0.98255	0.94453
Chr4	24660000	24670000	81	0.975152	0.944475
Chr8	22840000	22850000	206	0.987171	0.944345
Chr3	1530000	1540000	90	0.990946	0.944237
Chr8	22460000	22470000	48	0.981241	0.943983
Chr5	20730000	20740000	86	0.987276	0.943968
Chr11	7700000	7710000	84	0.977761	0.943686
Chr8	22740000	22750000	143	0.975138	0.943607
Chr6	25850000	25860000	113	0.984423	0.943437
Chr2	32840000	32850000	152	0.985245	0.943255
Chr9	18540000	18550000	67	0.984908	0.943076
Chr8	22720000	22730000	109	0.978535	0.943034
Chr5	23280000	23290000	96	0.978291	0.942963
Chr4	11260000	11270000	98	0.975156	0.942922
Chr5	23440000	23450000	127	0.980339	0.942851
Chr1	35900000	35910000	54	0.970465	0.942832
Chr4	34360000	34370000	129	0.983117	0.942779
Chr1	31250000	31260000	109	0.969701	0.942586
Chr4	24650000	24660000	112	0.981735	0.942458
Chr6	26000000	26010000	47	0.9705	0.942446
Chr4	29550000	29560000	65	0.98088	0.94233
Chr6	13660000	13670000	123	0.98468	0.942216
Chr4	28850000	28860000	110	0.986244	0.942105
Chr9	18880000	18890000	79	0.978009	0.942092
Chr9	12960000	12970000	65	0.983472	0.941892
Chr3	5530000	5540000	61	0.980443	0.941884
Chr11	3230000	3240000	111	0.982639	0.941671
Chr12	3150000	3160000	71	0.974413	0.941503
Chr3	6130000	6140000	30	0.981612	0.941239
Chr3	5030000	5040000	97	0.978786	0.941137
Chr7	4140000	4150000	87	0.985004	0.941087
Chr1	37240000	37250000	168	0.985596	0.940862
Chr1	37340000	37350000	91	0.975404	0.940297
Chr7	21700000	21710000	260	0.978837	0.940242
Chr3	6240000	6250000	103	0.990579	0.939976
Chr1	27490000	27500000	70	0.976966	0.939777
Chr12	3210000	3220000	52	0.971705	0.939595
Chr9	17950000	17960000	96	0.987128	0.939489
Chr5	23130000	23140000	155	0.979014	0.939417
Chr3	4730000	4740000	82	0.983515	0.939396
Chr8	2130000	2140000	85	0.980425	0.938921
Chr8	22750000	22760000	105	0.983948	0.938861
Chr8	22790000	22800000	174	0.978572	0.938837
Chr1	10440000	10450000	207	0.982925	0.938466
Chr1	38060000	38070000	100	0.983297	0.938114
Chr5	21230000	21240000	112	0.981728	0.937264
Chr4	28900000	28910000	87	0.984031	0.937235
Chr1	10470000	10480000	89	0.982572	0.937214
Chr2	32890000	32900000	111	0.984309	0.937015
Chr12	19650000	19660000	105	0.973342	0.936972
Chr8	22030000	22040000	69	0.987126	0.936925
Chr8	22620000	22630000	37	0.982333	0.936917
Chr10	20880000	20890000	122	0.986166	0.93667
Chr1	42940000	42950000	62	0.98087	0.936623
Chr7	24500000	24510000	156	0.972268	0.936445
Chr5	21130000	21140000	66	0.982014	0.935414
Chr1	31060000	31070000	91	0.982568	0.935334
Chr3	3080000	3090000	75	0.981628	0.935295
Chr5	23460000	23470000	105	0.972291	0.934648
Chr8	23200000	23210000	168	0.984253	0.9346
Chr8	23420000	23430000	89	0.97482	0.934487
Chr7	24490000	24500000	156	0.95565	0.934289
Chr3	2790000	2800000	128	0.986409	0.934059
Chr6	25700000	25710000	65	0.985895	0.933844
Chr10	22170000	22180000	61	0.938984	0.933492
Chr1	40760000	40770000	81	0.979559	0.933294
Chr12	2280000	2290000	63	0.977889	0.933135
Chr1	37430000	37440000	215	0.978638	0.933054
Chr10	22110000	22120000	61	0.988082	0.932696
Chr3	5640000	5650000	33	0.975925	0.932608
Chr4	24800000	24810000	68	0.981172	0.931962
Chr4	24850000	24860000	52	0.973172	0.931564
Chr8	28270000	28280000	85	0.984013	0.931162
Chr6	12670000	12680000	100	0.973135	0.930867
Chr5	21000000	21010000	65	0.982719	0.930779
Chr6	28270000	28280000	67	0.958418	0.930433
Chr12	2380000	2390000	97	0.973453	0.930154
Chr6	25940000	25950000	62	0.972373	0.929734
Chr5	21080000	21090000	55	0.97913	0.929724
Chr4	24540000	24550000	18	0.979066	0.92967
Chr1	9760000	9770000	82	0.979019	0.929366
Chr12	27470000	27480000	63	0.982896	0.928852
Chr8	22150000	22160000	116	0.97805	0.928603
Chr9	18800000	18810000	69	0.968882	0.928285
Chr8	22040000	22050000	37	0.975437	0.928251
Chr8	2120000	2130000	53	0.983779	0.928195
Chr6	7400000	7410000	98	0.98448	0.928159
Chr2	22070000	22080000	148	0.984905	0.927935
Chr8	22340000	22350000	118	0.964776	0.927464
Chr10	21300000	21310000	45	0.982491	0.927306
Chr12	2220000	2230000	108	0.974717	0.9273
Chr7	22750000	22760000	55	0.986649	0.927268
Chr1	35910000	35920000	76	0.982314	0.927218
Chr7	25420000	25430000	75	0.971382	0.926954
Chr11	10070000	10080000	228	0.97908	0.926813
Chr8	2090000	2100000	30	0.97381	0.926316
Chr3	6260000	6270000	63	0.967261	0.926149
Chr9	18770000	18780000	100	0.970928	0.926017
Chr1	35520000	35530000	72	0.97659	0.925813
Chr11	1600000	1610000	58	0.983878	0.925696
Chr8	23240000	23250000	156	0.979933	0.925649
Chr9	22060000	22070000	92	0.980896	0.924506
Chr12	8820000	8830000	155	0.956967	0.924186
Chr9	17140000	17150000	100	0.981315	0.923851
Chr6	28290000	28300000	67	0.964005	0.923627
Chr5	23290000	23300000	31	0.982639	0.923599
Chr7	24440000	24450000	51	0.987045	0.923367
Chr8	23110000	23120000	80	0.980673	0.923246
Chr12	2290000	2300000	90	0.967856	0.923057
Chr7	5350000	5360000	119	0.974456	0.922785
Chr9	17200000	17210000	27	0.970675	0.92266
Chr10	21710000	21720000	99	0.983812	0.922379
Chr7	24040000	24050000	207	0.970026	0.922265
Chr3	4040000	4050000	52	0.965706	0.921648
Chr4	29020000	29030000	85	0.959349	0.921415
Chr8	28380000	28390000	77	0.988349	0.921324
Chr3	2750000	2760000	90	0.981991	0.921316
Chr1	9560000	9570000	62	0.966576	0.920791
Chr12	19700000	19710000	87	0.97773	0.920773
Chr9	17680000	17690000	89	0.980177	0.920713
Chr12	2430000	2440000	128	0.969311	0.920609
Chr9	21710000	21720000	74	0.97661	0.920556
Chr1	5000000	5010000	72	0.971433	0.920231
Chr7	24530000	24540000	195	0.977423	0.920084
Chr1	28930000	28940000	76	0.974631	0.919798
Chr5	23410000	23420000	91	0.981155	0.91945
Chr4	29030000	29040000	112	0.967588	0.91924
Chr6	12710000	12720000	129	0.983816	0.919026
Chr12	2360000	2370000	67	0.959866	0.918772
Chr7	4790000	4800000	82	0.971213	0.918764
Chr2	3960000	3970000	156	0.946848	0.918579
Chr1	21740000	21750000	112	0.956042	0.918133
Chr2	3850000	3860000	80	0.985461	0.918119
Chr1	42950000	42960000	48	0.965346	0.917491
Chr4	34400000	34410000	71	0.971819	0.917355
Chr5	4540000	4550000	81	0.97968	0.917314
Chr4	35190000	35200000	62	0.977355	0.917263
Chr9	17700000	17710000	65	0.95698	0.916991
Chr12	2340000	2350000	108	0.965066	0.916763
Chr4	34340000	34350000	40	0.97361	0.916596
Chr1	10220000	10230000	64	0.988423	0.916328
Chr6	25890000	25900000	96	0.970432	0.916143
Chr12	7620000	7630000	79	0.96446	0.91602
Chr8	22600000	22610000	90	0.975555	0.916001
Chr12	5110000	5120000	91	0.976332	0.915892
Chr6	13810000	13820000	130	0.982105	0.91585
Chr8	23000000	23010000	126	0.97431	0.915095
Chr8	23040000	23050000	53	0.968643	0.914935
Chr4	35000000	35010000	134	0.976515	0.914414
Chr8	1970000	1980000	92	0.977221	0.91401
Chr3	3000000	3010000	80	0.972509	0.913689
Chr10	21650000	21660000	64	0.974065	0.913672
Chr5	21150000	21160000	110	0.97897	0.913549
Chr1	37360000	37370000	53	0.980544	0.913443
Chr9	12770000	12780000	119	0.975997	0.913422
Chr7	17240000	17250000	84	0.97459	0.913108
Chr5	20680000	20690000	131	0.98092	0.912858
Chr5	17290000	17300000	69	0.978091	0.91251
Chr9	12900000	12910000	73	0.97002	0.912327
Chr5	18860000	18870000	83	0.97504	0.912278
Chr8	23030000	23040000	91	0.966943	0.912011
Chr1	37370000	37380000	122	0.970915	0.911886
Chr1	5040000	5050000	140	0.975598	0.911628
Chr9	22800000	22810000	74	0.971298	0.911456
Chr12	7570000	7580000	112	0.96274	0.911342
Chr7	2470000	2480000	73	0.97191	0.910504
Chr9	12750000	12760000	178	0.961059	0.909995
Chr7	25410000	25420000	52	0.964039	0.909792
Chr1	27270000	27280000	56	0.983951	0.90945
Chr3	35790000	35800000	94	0.927666	0.909037
Chr4	29620000	29630000	100	0.969991	0.90859
Chr12	3160000	3170000	79	0.96251	0.90841
Chr1	28950000	28960000	107	0.96876	0.908229
Chr9	18790000	18800000	124	0.957658	0.90818
Chr1	31080000	31090000	73	0.959413	0.908069
Chr8	22980000	22990000	91	0.984737	0.907762
Chr7	5850000	5860000	86	0.91298	0.907693
Chr5	17310000	17320000	128	0.971026	0.907371
Chr7	21680000	21690000	84	0.974633	0.907094
Chr1	42960000	42970000	79	0.954588	0.907067
Chr1	37500000	37510000	35	0.982519	0.906799
Chr4	32990000	33000000	74	0.909408	0.90636
Chr1	30710000	30720000	155	0.961662	0.906265
Chr12	3190000	3200000	107	0.965335	0.906243
Chr7	4130000	4140000	88	0.979768	0.906154
Chr1	37150000	37160000	68	0.986168	0.90596
Chr12	9050000	9060000	272	0.974488	0.905953
Chr12	2210000	2220000	83	0.964089	0.905858
Chr1	27660000	27670000	38	0.970273	0.905684
Chr3	3010000	3020000	191	0.97018	0.905124
Chr2	33710000	33720000	28	0.968644	0.904861
Chr1	36730000	36740000	66	0.956463	0.904828
Chr2	20280000	20290000	81	0.956169	0.904571
Chr1	31590000	31600000	101	0.950685	0.90438
Chr7	5880000	5890000	32	0.931413	0.904376
Chr7	4310000	4320000	47	0.956692	0.904133
Chr9	18120000	18130000	48	0.955287	0.904
Chr6	12890000	12900000	212	0.979327	0.903859
Chr5	17170000	17180000	134	0.977129	0.90374
Chr8	23210000	23220000	74	0.977591	0.903532
Chr8	22700000	22710000	73	0.983413	0.903469
Chr11	1480000	1490000	50	0.952495	0.902911
Chr6	13850000	13860000	84	0.978264	0.902904
Chr12	3200000	3210000	49	0.963903	0.902325
Chr11	1330000	1340000	60	0.97958	0.902172
Chr1	30860000	30870000	132	0.959742	0.902037
Chr4	24510000	24520000	55	0.982679	0.901725
Chr12	19710000	19720000	155	0.950295	0.901363
Chr1	9470000	9480000	60	0.973061	0.901306
Chr4	25010000	25020000	51	0.956572	0.901185
Chr7	24220000	24230000	88	0.955024	0.901181
Chr6	28280000	28290000	30	0.967847	0.90078
Chr8	28280000	28290000	105	0.97399	0.900237
Chr7	6880000	6890000	135	0.968049	0.900078
Chr8	2000000	2010000	303	0.93678	0.899803
Chr3	6450000	6460000	53	0.984429	0.899227
Chr4	24990000	25000000	47	0.953531	0.898848
Chr8	28310000	28320000	84	0.971374	0.89872
Chr1	39900000	39910000	76	0.971437	0.898545
Chr9	18860000	18870000	113	0.972523	0.898414
Chr5	23380000	23390000	101	0.953275	0.898178
Chr1	37570000	37580000	65	0.977745	0.897973
Chr1	7850000	7860000	31	0.97588	0.896623
Chr3	1120000	1130000	56	0.95316	0.896469
Chr1	10480000	10490000	118	0.978066	0.89605
Chr9	18200000	18210000	119	0.973775	0.895751
Chr1	37950000	37960000	62	0.9819	0.895645
Chr10	20300000	20310000	96	0.897185	0.895375
Chr3	32180000	32190000	78	0.980208	0.895229
Chr6	25900000	25910000	129	0.963025	0.895138
Chr10	900000	910000	158	0.965338	0.895125
Chr4	10690000	10700000	110	0.957977	0.89497
Chr7	23410000	23420000	112	0.964548	0.894225
Chr6	12280000	12290000	123	0.968241	0.894166
Chr10	22160000	22170000	52	0.91116	0.893907
Chr10	10990000	11000000	106	0.957906	0.893635
Chr2	34840000	34850000	67	0.96237	0.893604
Chr8	14210000	14220000	61	0.947422	0.893271
Chr11	1310000	1320000	24	0.97298	0.893153
Chr1	28940000	28950000	110	0.94958	0.89192
Chr10	16650000	16660000	202	0.909441	0.891821
Chr2	22690000	22700000	39	0.977297	0.891479
Chr3	17260000	17270000	90	0.95234	0.89134
Chr8	23230000	23240000	89	0.975204	0.890716
Chr8	1610000	1620000	113	0.959784	0.890441
Chr3	1600000	1610000	75	0.9804	0.889948
Chr2	5410000	5420000	53	0.975397	0.889754
Chr1	37760000	37770000	36	0.971967	0.889308
Chr1	11080000	11090000	130	0.966009	0.889028
Chr8	22190000	22200000	67	0.969719	0.889019
Chr8	22350000	22360000	111	0.967849	0.889011
Chr12	2420000	2430000	37	0.929342	0.888957
Chr7	4100000	4110000	42	0.963994	0.888395
Chr7	5940000	5950000	76	0.906952	0.887332
Chr4	28380000	28390000	36	0.887206	0.88713
Chr7	5840000	5850000	139	0.906647	0.886324
Chr1	37420000	37430000	63	0.971321	0.885932
Chr8	22520000	22530000	43	0.978124	0.884567
Chr4	24980000	24990000	117	0.965817	0.88431
Chr1	29260000	29270000	81	0.974214	0.883743
Chr2	32990000	33000000	123	0.974087	0.883126
Chr5	21110000	21120000	78	0.973206	0.882917
Chr12	7650000	7660000	55	0.950139	0.882881
Chr8	22300000	22310000	61	0.974969	0.882653
Chr3	6220000	6230000	87	0.984045	0.881829
Chr3	4710000	4720000	85	0.962739	0.881744
Chr5	18750000	18760000	103	0.974227	0.881631
Chr1	36690000	36700000	51	0.968735	0.881589
Chr12	2400000	2410000	109	0.924241	0.881513
Chr12	2410000	2420000	74	0.920672	0.881475
Chr8	22440000	22450000	70	0.97885	0.881153
Chr4	35180000	35190000	42	0.974932	0.880987
Chr3	31320000	31330000	110	0.960271	0.879886
Chr12	7610000	7620000	40	0.949675	0.87987
Chr4	35330000	35340000	84	0.967051	0.879784
Chr9	12640000	12650000	54	0.961824	0.879741
Chr1	37040000	37050000	57	0.972176	0.879584
Chr5	24280000	24290000	62	0.893322	0.879157
Chr1	37000000	37010000	22	0.965208	0.878304
Chr12	7690000	7700000	26	0.94436	0.87828
Chr7	5830000	5840000	42	0.927149	0.876709
Chr1	37010000	37020000	70	0.967723	0.876622
Chr3	4880000	4890000	107	0.96138	0.876455
Chr1	5120000	5130000	137	0.945832	0.876201
Chr3	31840000	31850000	87	0.971064	0.876135
Chr8	1450000	1460000	53	0.979328	0.875474
Chr5	23400000	23410000	125	0.968976	0.875454
Chr1	9440000	9450000	49	0.933151	0.874225
Chr3	23910000	23920000	108	0.885364	0.874207
Chr1	38240000	38250000	128	0.961491	0.873684
Chr2	8000000	8010000	69	0.885274	0.873663
Chr12	7640000	7650000	149	0.957213	0.87334
Chr12	7600000	7610000	69	0.951393	0.872792
Chr10	14420000	14430000	61	0.882332	0.872334
Chr2	32650000	32660000	47	0.976995	0.871275
Chr12	5480000	5490000	84	0.975164	0.871052
Chr5	18870000	18880000	72	0.969082	0.870427
Chr10	20660000	20670000	71	0.884208	0.870145
Chr1	38910000	38920000	42	0.885468	0.869883
Chr10	22150000	22160000	72	0.924349	0.869841
