# Supplementary material for: Whole Genome Resequencing of 20 Accessions of Rice Landraces Reveals Javanica Genomic Structure Variation and Allelic Genotypes of a Grain Weight Gene TGW2
Source: Front Plant Sci. 2022 Apr 25;13:857435. doi: 10.3389/fpls.2022.857435 (PMC9083905; doi:10.3389/fpls.2022.857435)
Supplement: Supplementary file 10 [file Table_7.XLSX]

## Sheet: gw7.variation
chromosome	position	ref	alt	R1	R2	R3	R4	R5	R6	R7	R8	R9	R10	R11	R12	R13	R14	R15	R16	R17	R18	R19	R20
Chr7	24665290	G	A	G	G	G	A	A	A	A	A	G	G	G	G	A	A	A	G	G	G	A	A
Chr7	24665973	A	C	C	C	C	A	A	A	A	A	C	A	C	C	A	A	A	C	C	C	A	A
Chr7	24666092	T	C	T	T	T	C	C	C	C	C	T	T	T	T	C	C	C	T	T	T	C	C
Chr7	24666135	G	C	G	G	G	G	G	G	G	G	G	C	G	G	G	G	G	G	G	G	G	G
Chr7	24666398	G	A	G	G	G	A	A	A	A	A	G	G	G	G	A	A	A	G	G	G	A	A
Chr7	24667068	G	A	A	A	A	A	A	A	A	A	A	A	A	A	A	A	A	A	A	A	A	A
Chr7	24667807	A	T	T	T	T	A	A	A	A	A	T	A	T	T	A	A	A	T	T	T	A	A
Chr7	24668286	C	G	C	C	C	C	C	C	C	C	C	G	C	C	C	C	C	C	C	C	C	C
Chr7	24668470	A	G	G	G	G	A	A	A	A	A	G	G	G	G	A	A	A	G	G	G	A	A
Chr7	24668499	A	AT,ATT	ATT	ATT	ATT	AT	AT	AT	AT	AT	ATT	ATT	ATT	ATT	AT	AT	AT	ATT	ATT	AT	AT	AT
Chr7	24668512	A	AAAAACTTTCTACTAGCAATAAACTGCTTT	AAAAACTTTCTACTAGCAATAAACTGCTTT	AAAAACTTTCTACTAGCAATAAACTGCTTT	AAAAACTTTCTACTAGCAATAAACTGCTTT	AAAAACTTTCTACTAGCAATAAACTGCTTT	AAAAACTTTCTACTAGCAATAAACTGCTTT	AAAAACTTTCTACTAGCAATAAACTGCTTT	AAAAACTTTCTACTAGCAATAAACTGCTTT	T	AAAAACTTTCTACTAGCAATAAACTGCTTT	AAAAACTTTCTACTAGCAATAAACTGCTTT	AAAAACTTTCTACTAGCAATAAACTGCTTT	AAAAACTTTCTACTAGCAATAAACTGCTTT	T	T	T	AAAAACTTTCTACTAGCAATAAACTGCTTT	AAAAACTTTCTACTAGCAATAAACTGCTTT	AAAAACTTTCTACTAGCAATAAACTGCTTT	T	T
Chr7	24668561	A	G	G	G	G	A	A	A	A	A	G	G	G	G	A	A	A	G	G	G	A	A
Chr7	24668711	T	TATGTCCCAAAAAA				TATGTCCCAAAAAA	T		TATGTCCCAAAAAA	TATGTCCCAAAAAA		T			TATGTCCCAAAAAA	TATGTCCCAAAAAA	TATGTCCCAAAAAA				TATGTCCCAAAAAA	TATGTCCCAAAAAA
Chr7	24668712	A	ATGTC	ATGTC	ATGTC	ATGTC			A			ATGTC	ATGTC	ATGTC					ATGTC	ATGTC
Chr7	24668713	A	C	C	C	C						C	C	C					C	C
Chr7	24668714	C	A	C			A	A		A	A					A	A	A				A	A
Chr7	24668715	ACTT	A	A	A	A				ACTT		A	A	A		ACTT			A	A		ACTT	ACTT
Chr7	24668718	TAAAAACAGA	T	TAAAAACAGA	TAAAAACAGA	TAAAAACAGA	TAAAAACAGA	TAAAAACAGA	TAAAAACAGA	TAAAAACAGA		TAAAAACAGA	TAAAAACAGA	TAAAAACAGA		TAAAAACAGA	TAAAAACAGA	TAAAAACAGA	TAAAAACAGA	TAAAAACAGA	T	TAAAAACAGA	TAAAAACAGA
Chr7	24668720	A	C				C	C		C	C					C	C	C				C	C
Chr7	24668728	T	TTTTTA	T	T	T	T	T	T	T		T	T	T		T	T	T	T	T	TTTTTA	T	T
Chr7	24668730	GCTTAAAAAC	G	GCTTAAAAAC	GCTTAAAAAC	GCTTAAAAAC	GCTTAAAAAC	GCTTAAAAAC	GCTTAAAAAC	GCTTAAAAAC		GCTTAAAAAC	GCTTAAAAAC	GCTTAAAAAC		GCTTAAAAAC	GCTTAAAAAC	GCTTAAAAAC	GCTTAAAAAC	GCTTAAAAAC	G	GCTTAAAAAC	GCTTAAAAAC
Chr7	24668731	C	CCTTTTT	CCTTTTT	CCTTTTT	CCTTTTT						CCTTTTT	CCTTTTT	CCTTTTT					CCTTTTT	CCTTTTT
Chr7	24668738	AC	A				A	A		A	A					A	A	A				A	A
Chr7	24668739	C	A	A	A	A						A	A	A					A	A	A
Chr7	24668740	A	AG	A	A	A	A	A	A	A		A	A	A		A	A	A	A	A	AG	A	A
Chr7	24668755	G	A	A	A	A	G	G	G	G	G	A	A	A		G		G	A	A	A	G	G
Chr7	24668943	C	T	T	T	T	C	C	C	C	C	T	C	T	T	C	C	C	T	T	T	C	C
Chr7	24668947	A	C	C	C	C	A	A	A	A	A	C	C	C	C	A	A	A	C	C	C	A	A
Chr7	24669157	A	C	C	C	C	C	C	C	C	C	C	C	C	C	C	C	C	C	C	C	C	C
Chr7	24669200	C	A	C	C	C	C	C	C	C	C	C	A	C	C	C	C		C	C	C	C	C
Chr7	24669225	T	C	C	C	C						C	T	C	C				C	C	C	T
Chr7	24669274	GTGATGGTATGATGAGATA	G	G	G		GTGATGGTATGATGAGATA	GTGATGGTATGATGAGATA	GTGATGGTATGATGAGATA	GTGATGGTATGATGAGATA	GTGATGGTATGATGAGATA	G	G	G	G	GTGATGGTATGATGAGATA	GTGATGGTATGATGAGATA	GTGATGGTATGATGAGATA	G			GTGATGGTATGATGAGATA	GTGATGGTATGATGAGATA
Chr7	24669383	GGTGGGGGGT	G	G		G		GGTGGGGGGT		GGTGGGGGGT	GGTGGGGGGT	G		G	G	GGTGGGGGGT		GGTGGGGGGT	G			GGTGGGGGGT	GGTGGGGGGT
Chr7	24669392	T	G								G					G						G	G
Chr7	24669524	G	A						A										A				A
Chr7	24669549	T	G				G		G	G							G	G				G	G
Chr7	24669610	TGCGGCTCG	T				T	T	T	T	T					T	T	T				T	T
Chr7	24669702	CGAGAGATGAA	C			C	C	C	C	C	C	C	C	C		C	C	C	C	C		C	C
Chr7	24669739	GGTGTGAATACTTT	G		G	G						G		G					G	G
Chr7	24669742	GTGAATACTTTCTA	G				G	G	G	G	G		G			G	G	G				G	G
Chr7	24669755	A	G		G	G						G		G					G	G
Chr7	24669785	T	A	A	A	A	A	A	A	A	A	A	A	A	A	A	A	A	A	A		A	A
Chr7	24669806	A	G	G	G	G	G	G	G	G	G	G	G	G	G	G	G	G	G	G		G	G
Chr7	24669821	C	T	C	C	C	T	T	T	T	T	C	C	C	C	T	T	T	C	C		T	T
Chr7	24669853	G	A	A	A	A	G	G	G	G	G	A	A	A	A	G	G	G	A	A		G	G
Chr7	24669858	G	C	C	C	C	G	G	G	G	G	C	C	C	C	G	G	G	C	C		G	G
Chr7	24669872	T	TATCTTC	TATCTTC	TATCTTC	TATCTTC	T	T	T	T	T	TATCTTC	TATCTTC	TATCTTC	TATCTTC	T	T	T	TATCTTC	TATCTTC		T	T
Chr7	24669899	C	T	T	T	T	C	C	C	C	C	T	T	T	T	C	C	C	T	T		C	C
Chr7	24669915	G	A	G	G	G	G	G	G	G	G	G	A	G	G	G	G	G	G	G		G	G
Chr7	24669957	A	G	G	G	G	A	A	A	A	A	G	G	G	G	A	A	A	G	G		A	A
Chr7	24669993	C	T	T	T	T	C	C	C	C	C	T	T	T	T	C	C	C	T	T		C	C
Chr7	24670027	C	T	T	T	T	C	C	C	C	C	T	T	T	T	C	C	C	T	T		C	C
Chr7	24670116	C	T	T	T	T	C	C	C	C	C	T	T	T	T	C	C	C	T	T		C	C
Chr7	24670156	AT	A	A	A	A	AT	AT	AT	AT	AT	A	A	A	A	AT	AT	AT	A	A	A	AT	AT
Chr7	24670177	C	T	T	T	T	C	C	C	C	C	T	C	T	T	C	C	C	T	T	T	C	C
Chr7	24670200	A	G	G	G	G	A	A	A	A	A	G	A	G	G	A	A	A	G	G	G	A	A
Chr7	24670233	G	T	T	T	T	G	G	G	G	G	T	G	T	T	G	G	G		T	T	G	G
Chr7	24670252	C	A	A	A	A	C	C	C	C	C	A		A	A	C	C	C		A	A	C	C
Chr7	24670255	G	C		G		C	C	C	C	C	G				C	C	C			G	C	C
Chr7	24670264	T	C	C	C		C	C	C	C	C	C	C	C	C	C	C	C		C	C	C	C
Chr7	24670274	C	CGGA			CGGA	C	C	C	C	C		CGGA			C	C	C				C	C
Chr7	24670278	G	GGAT	GGAT	GGAT	G	G	G	G	G	G	GGAT		GGAT	GGAT	G	G	G		GGAT	GGAT	G	G
Chr7	24670300	G	A	G	G	G	G	G	G	G	G	G	G	G	G	G	G	G	G	G	G	G	G
Chr7	24670365	A	G	G	G	G	G	G	G	G	G	G	G	G	G	G	G	G	G	G	G	G	G
Chr7	24670437	A	G	A	A	A	A	A	A	A	A	A	G	A	A	A	A	A	A	A	A	A	A

## Sheet: GSA1.variation
Chromosome	postion	ref	alt	R1	R2	R3	R4	R5	R6	R7	R8	R9	R10	R11	R12	R13	R14	R15	R16	R17	R18	R19	R20
Chr3	31297587	T	C	T	C	T	T	T	./.:.:0:.:.	C	C	C	C	C	C	C	C	C	C	C	C	C	C
Chr3	31297652	T	TCGC	T	TCGC	T		T	T	T	T	TCGC	TCGC	TCGC	TCGC	T	T	T	TCGC	TCGC	TCGC	T	T
Chr3	31297726	A	G	A	G	A	A	A	A	A	A	G	G	G	G	A	A	A	G	G	G	A	A
Chr3	31297814	A	G	A	G	A	A	A	A	A	A	G	G	G		A	A	A	G	G	G	A	A
Chr3	31297846	CGGGG	C	CGGGG	C	CGGGG	CGGGG	CGGGG	CGGGG	CGGGG	CGGGG	C	C	C	C	CGGGG	CGGGG	CGGGG	C	C	C	CGGGG	CGGGG
Chr3	31297942	A	G	A	G	A	A	A	A	A	A	G	G	G	G	A	A	A	G	G	G	A	A
Chr3	31297994	T	A	T	A	T	T	T	T	T	T	A	A	A		T	T	T	A	A	A	T	T
Chr3	31298026	C	CCCTCCGTTTT	C	CCCTCCGTTTT	C	C	C	C	C	C	CCCTCCGTTTT	CCCTCCGTTTT	CCCTCCGTTTT	CCCTCCGTTTT	C	C	C	CCCTCCGTTTT	CCCTCCGTTTT	CCCTCCGTTTT	C	C
Chr3	31298051	A	G	A	G	A	A		A	A		G	G	G		A	A	A	G	G	G		A
Chr3	31298109	T	C	T			T	T	T	T	T	C	C			T	T	T		C		T	T
Chr3	31298123	T	A	T			T	T	T	T	T	A	A			T	T	T		A		T	T
Chr3	31298130	A	T	A			A	A	A	A	A	T	T			A	A	A				A	A
Chr3	31298478	G	A	G	A	G	G	G	G	G	G	A	A	A	A	G	G	G	A	A	A	G	G
Chr3	31298672	T	TG	TG	TG	TG	TG	TG	TG	TG	TG	TG	TG	TG	TG	TG	TG	TG	TG	TG		TG	TG
Chr3	31298705	A	G	A	G	A	A		A	A	A	G	G	G	G	A	A	A	G	G		A	A
Chr3	31298791	CAA	CA,C	CA		CA		CA	CA	CA	CA	C	C	C	C	CA	CA	CA		C		CA	CA
Chr3	31298802	A	T	A		A	A	A	A	A	A	T	T	T	T	A	A	A		T		A	A
Chr3	31298826	GTTAAA	G	GTTAAA		GTTAAA	GTTAAA	GTTAAA	GTTAAA	GTTAAA	GTTAAA		G	G	G	GTTAAA	GTTAAA	GTTAAA		G		GTTAAA	GTTAAA
Chr3	31298844	A	G	A		A	A	A	A	A	A		G	G	G	A	A	A		G		A	A
Chr3	31298847	C	G	C		C	C	C	C	C	C		G	G	G	C	C	C		G		C	C
Chr3	31298854	T	C	T		T	T	T	T	T	T		C	C	C	T	T	T		C		T	T
Chr3	31298855	T	C	T		T	T	T	T	T	T		C	C	C	T	T	T		C		T	T
Chr3	31298859	A	G	A		A	A	A	A	A	A		G	G	G	A	A	A		G		A	A
Chr3	31298879	T	TC	T		T	T	T	T	T	T		TC	TC	TC	T	T	T		TC		T	T
Chr3	31298890	G	GT				G		GT		GT					GT	GT	G				G	G
Chr3	31298949	G	A	G		G	G		G	G	G	A	A	A	A	G	G	G	A	A	A	G	G
Chr3	31298985	C	T	C		C	C	C	C	C	C	T	T	T	T	C	C	C	T	T	T	C	C
Chr3	31299038	A	T	A	T	A	A	A	A	A	A	T	T	T	T	A	A	A	T	T	T	A	A
Chr3	31299298	G	C	G	C	G	G	G	G	G	G	C	C	C	C	G	G	G	C	C	C	G	G
Chr3	31299941	G	A	G	A	G	G	G	G	G	G	A	A	A	A	G	G	G	A	A	A	G	G
Chr3	31300126	C	T	C	T	C	C	C	C	C	C	T	T	T	T	C	C	C	T	T	T	C	C
Chr3	31300770	G	T	G	T	G	G	G	G	G	G	T	T	T	T	G	G	G	T	T	T	G	G
